# Supplementary material for: Nanopore Direct RNA-Seq Reveals Widespread and Predictable Non-Coding Transcriptional Variations in DNA Methylation-deficient Arabidopsis
Source: Research Square preprint supplement (doi:10.21203/rs.3.rs-6399991/v1), 2025-05-07
Supplement: Supplementary file 1 [file 02e3c355f6c269bb7ee53ce6.pdf]

A

Model performance

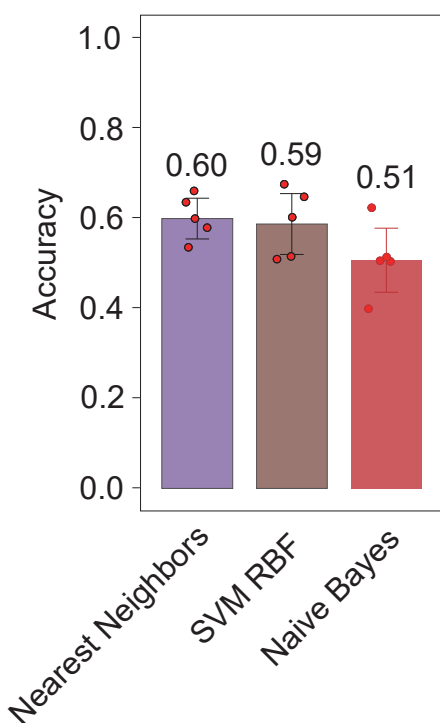

B

ROC curves

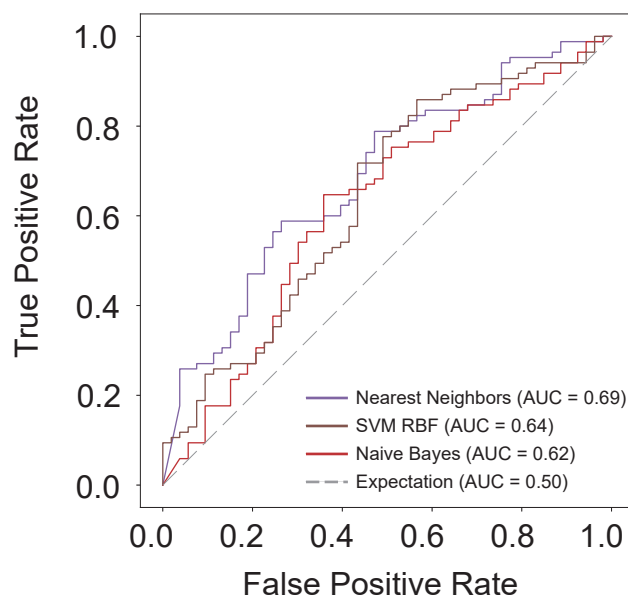

C

Precision-recall curves

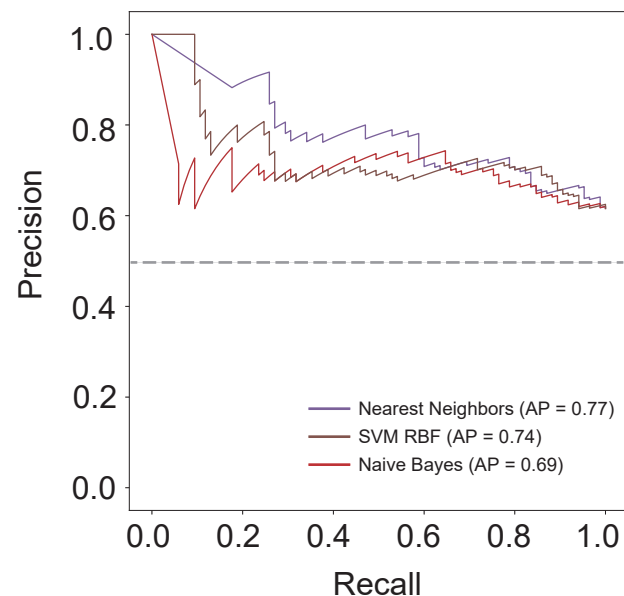

D

Top 7 Features in Models

Random Forest  
(Top 7 = 45.1%)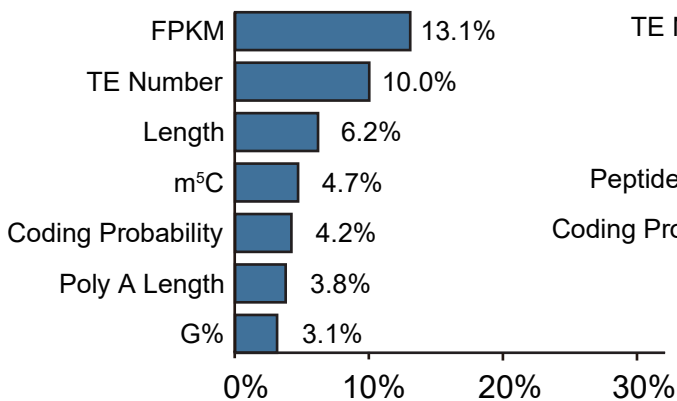XGBoost  
(Top 7 = 37.9%)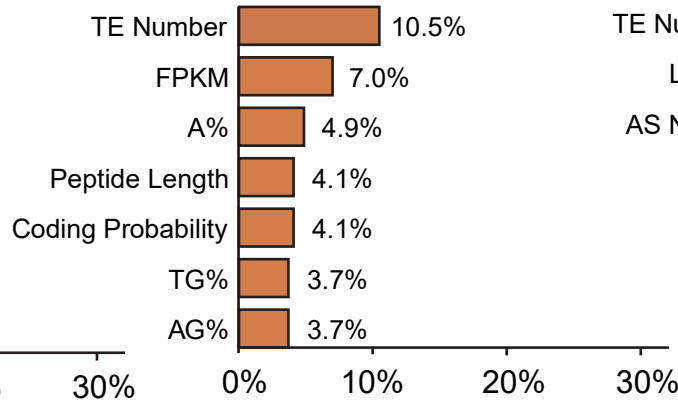SVM Linear  
(Top 7 = 66.5%)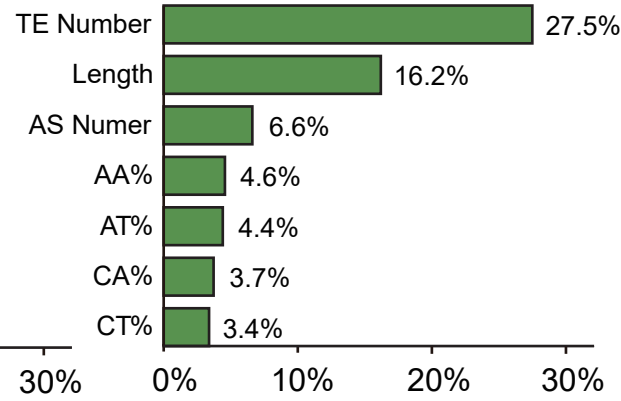Nearest Neighbors  
(Top 7 = 35.4%)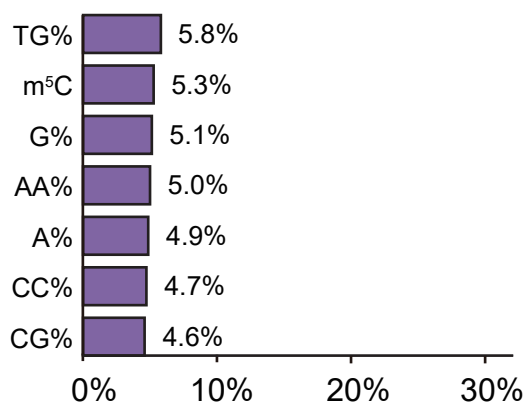SVM RBF  
(Top 7 = 32.1%)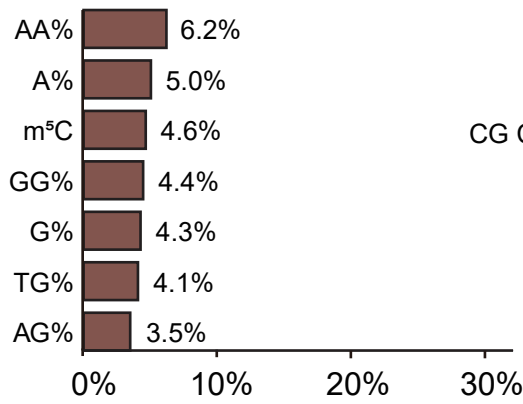Naive Bayes  
(Top 7 = 29.4%)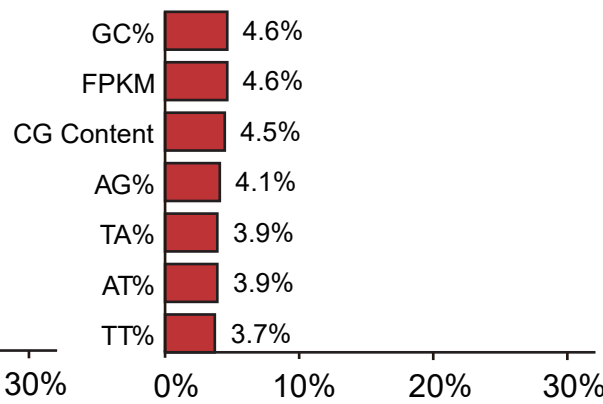

Normalized Feature Importance (%)
