# Supplementary material for: Nanopore Direct RNA-Seq Reveals Widespread and Predictable Non-Coding Transcriptional Variations in DNA Methylation-deficient Arabidopsis
Source: Research Square preprint supplement (doi:10.21203/rs.3.rs-6399991/v1), 2025-05-07
Supplement: Supplementary file 2 [file bb5834587725048f031d3891.xlsx]

## Sheet: Table S1
Table S1: Summary of dRNA-seq read statistics
Sample	Molecular Type	Sequencing technology	Read numbers	Total base	Average read length (bp)	Max read legnth (bp)	N50 (bp)
ddm1 1#	RNA	dRNA-seq(ONT)	7127874	6406371979	898.8	11492	1023
ddm1 2#	RNA	dRNA-seq(ONT)	11484850	7710413833	671.4	5839	883
met1 1#	RNA	dRNA-seq(ONT)	4741368	4561655018	962.1	10942	1139
met1 2#	RNA	dRNA-seq(ONT)	3161577	2886490669	913	9590	1041
WT 1#	RNA	dRNA-seq(ONT)	7129524	6977129890	978.6	14248	1145
WT 2#	RNA	dRNA-seq(ONT)	6911327	6473537045	936.7	14282	1097
ddm1 1#	DNA	DNA-seq (ONT)	505528	7061499924	13968.6	195796	14864
ddm1 2#	DNA	DNA-seq (ONT)	595318	9101989327	15289.3	208904	14037
met1 1#	DNA	DNA-seq (ONT)	462245	6332916913	13700.3	157029	13969
met1 2#	DNA	DNA-seq (ONT)	616308	7843829127	12727.1	167557	15289
WT 1#	DNA	DNA-seq (ONT)	446834	6641542974	14863.6	192227	13700
WT 2#	DNA	DNA-seq (ONT)	470877	6609869650	14037.4	171261	12727
ddm1 1#	RNA	ssRNA-seq	95708906	14356335900	150	150
ddm1 2#	RNA	ssRNA-seq	103956914	15593537100	150	150
met1 1#	RNA	ssRNA-seq	94132374	14119856100	150	150
met1 2#	RNA	ssRNA-seq	105827442	15874116300	150	150
WT 1#	RNA	ssRNA-seq	100918230	15137734500	150	150
WT 2#	RNA	ssRNA-seq	111795638	16769345700	150	150
WT buds_1*	RNA	dRNA-seq(ONT)	982453	983013109	1000.6	57487
WT buds_2*	RNA	dRNA-seq(ONT)	780410	721459374	924.5	24080
WT seedling_1*	RNA	dRNA-seq(ONT)	736859	724294462	982.9	20411
WT seedling_2*	RNA	dRNA-seq(ONT)	707220	711044347	1005.4	24734
* Zhang S, Li R, Zhang L, Chen S, Xie M, Yang L, Xia Y, Foyer CH, Zhao Z, Lam HM: New insights into Arabidopsis transcriptome complexity revealed by direct sequencing of native RNAs. Nucleic Acids Res 2020, 48:7700-7711.

## Sheet: Table S2
Table S2: Primary alginment of ONT DRS
sample	Total reads	Priamry mapped to genomic reads	Primary mapped to transcriptome	Mapping ratio	mapping ratio (transcriptome)
ddm1 1#	6242177	6248632	5933763	0.998967	0.94961
ddm1 2#	8851890	8859489	8309925	0.999142	0.937969
met1 1#	4037214	4039755	3952878	0.999371	0.978494
met1 2#	2942326	2944970	2886485	0.999102	0.980141
WT 1#	6379840	6386517	6331774	0.998955	0.991428
WT 2#	6030265	6036490	5974846	0.998969	0.989788

## Sheet: Table S3
Table S3: lincRNA annotation based on ONT LR
lincRNA_id	Type	Chr	Start	End	Strand
MSTRG.10755	ddm1_actived	Chr3	4929189	4930003	-
MSTRG.10813	ddm1_actived	Chr3	5153728	5156472	-
MSTRG.10850	ddm1_actived	Chr3	5283207	5286508	-
MSTRG.1086	ddm1_actived	Chr1	4333418	4334128	-
MSTRG.11475	ddm1_actived	Chr3	8101629	8102588	-
MSTRG.11744	ddm1_actived	Chr3	9609236	9610270	-
MSTRG.11926	ddm1_actived	Chr3	10481279	10484527	+
MSTRG.11976	ddm1_actived	Chr3	10810529	10811480	-
MSTRG.12047	ddm1_actived	Chr3	11435798	11438187	-
MSTRG.12058	ddm1_actived	Chr3	11512373	11513616	+
MSTRG.12082	ddm1_actived	Chr3	11794313	11797347	+
MSTRG.12083	ddm1_actived	Chr3	11797367	11798218	-
MSTRG.12085	ddm1_actived	Chr3	11818034	11818939	+
MSTRG.12098	ddm1_actived	Chr3	12004182	12442140	+
MSTRG.12111	ddm1_actived	Chr3	12186495	12192094	-
MSTRG.12112	ddm1_actived	Chr3	12210160	12227807	-
MSTRG.12113	ddm1_actived	Chr3	12212589	12249192	+
MSTRG.12117	ddm1_actived	Chr3	12291567	12293864	-
MSTRG.12122	ddm1_actived	Chr3	12378471	12381338	+
MSTRG.12124	ddm1_actived	Chr3	12385826	12387415	-
MSTRG.12128	ddm1_actived	Chr3	12441551	12442024	-
MSTRG.12135	ddm1_actived	Chr3	12512057	12517899	+
MSTRG.12141	ddm1_actived	Chr3	12560743	12562089	-
MSTRG.12142	ddm1_actived	Chr3	12563071	12570790	-
MSTRG.12164	ddm1_actived	Chr3	12846840	12848714	+
MSTRG.12166	ddm1_actived	Chr3	12901581	12904512	-
MSTRG.12171	ddm1_actived	Chr3	12970781	12981404	+
MSTRG.12185	ddm1_actived	Chr3	13203204	13209124	+
MSTRG.12192	ddm1_actived	Chr3	13310873	13313865	-
MSTRG.12208	ddm1_actived	Chr3	13454007	13454684	+
MSTRG.12213	ddm1_actived	Chr3	13501095	13502074	+
MSTRG.12217	ddm1_actived	Chr3	13565821	13568109	-
MSTRG.12223	ddm1_actived	Chr3	13651012	13653866	+
MSTRG.12224	ddm1_actived	Chr3	13653195	13653866	-
MSTRG.12233	ddm1_actived	Chr3	13898532	13919242	+
MSTRG.12234	ddm1_actived	Chr3	13902448	13914858	-
MSTRG.12235	ddm1_actived	Chr3	13918778	13919214	-
MSTRG.12239	ddm1_actived	Chr3	13973714	13974545	+
MSTRG.12241	ddm1_actived	Chr3	13980247	13983257	-
MSTRG.12244	ddm1_actived	Chr3	14055436	14056503	-
MSTRG.12249	ddm1_actived	Chr3	14097456	14098354	+
MSTRG.12250	ddm1_actived	Chr3	14102640	14104107	+
MSTRG.12255	ddm1_actived	Chr3	14134891	14135757	+
MSTRG.12261	ddm1_actived	Chr3	14191673	14204799	+
MSTRG.12269	ddm1_actived	Chr3	14261578	14266250	+
MSTRG.12270	ddm1_actived	Chr3	14273607	14285116	+
MSTRG.12278	ddm1_actived	Chr3	14344737	14351607	+
MSTRG.12288	ddm1_actived	Chr3	14473945	14474941	-
MSTRG.12289	ddm1_actived	Chr3	14475218	14478958	+
MSTRG.12291	ddm1_actived	Chr3	14497277	14502375	-
MSTRG.12296	ddm1_actived	Chr3	14549959	14556168	+
MSTRG.12302	ddm1_actived	Chr3	14656675	14660197	-
MSTRG.12304	ddm1_actived	Chr3	14712314	14717052	+
MSTRG.12312	ddm1_actived	Chr3	14785741	14791509	-
MSTRG.12315	ddm1_actived	Chr3	14799008	14804309	+
MSTRG.12326	ddm1_actived	Chr3	14997837	15001013	-
MSTRG.12334	ddm1_actived	Chr3	15133703	15138244	+
MSTRG.12364	ddm1_actived	Chr3	15411011	15412050	+
MSTRG.12379	ddm1_actived	Chr3	15546895	15548558	+
MSTRG.12380	ddm1_actived	Chr3	15560609	15562208	-
MSTRG.12383	ddm1_actived	Chr3	15570180	15571247	-
MSTRG.12394	ddm1_actived	Chr3	15641297	15642311	-
MSTRG.12416	ddm1_actived	Chr3	15808328	15810581	-
MSTRG.12429	ddm1_actived	Chr3	15919003	15923910	-
MSTRG.12434	ddm1_actived	Chr3	15955105	15956535	-
MSTRG.12568	ddm1_actived	Chr3	16957905	16962963	+
MSTRG.12646	ddm1_actived	Chr3	17402678	17407992	+
MSTRG.12652	ddm1_actived	Chr3	17433109	17434227	+
MSTRG.12725	ddm1_actived	Chr3	17775792	17776579	+
MSTRG.13857	ddm1_actived	Chr3	22655660	22656661	-
MSTRG.13860	ddm1_actived	Chr3	22661260	22662232	-
MSTRG.14236	ddm1_actived	Chr4	862768	865574	-
MSTRG.14262	ddm1_actived	Chr4	1017751	1020996	+
MSTRG.14400	ddm1_actived	Chr4	1802100	1804615	+
MSTRG.14430	ddm1_actived	Chr4	2013157	2014307	+
MSTRG.14431	ddm1_actived	Chr4	2013653	2015614	-
MSTRG.14432	ddm1_actived	Chr4	2015946	2018538	+
MSTRG.14438	ddm1_actived	Chr4	2036501	2040297	+
MSTRG.14444	ddm1_actived	Chr4	2071075	2073978	-
MSTRG.14456	ddm1_actived	Chr4	2155226	2156728	+
MSTRG.14459	ddm1_actived	Chr4	2159337	2160401	+
MSTRG.14463	ddm1_actived	Chr4	2198191	2199317	-
MSTRG.14466	ddm1_actived	Chr4	2208636	2209613	+
MSTRG.14485	ddm1_actived	Chr4	2355859	2362444	-
MSTRG.14532	ddm1_actived	Chr4	2582583	2585216	+
MSTRG.14580	ddm1_actived	Chr4	3159799	3161418	+
MSTRG.14581	ddm1_actived	Chr4	3279684	3284925	+
MSTRG.14583	ddm1_actived	Chr4	3306150	3307999	-
MSTRG.14585	ddm1_actived	Chr4	3330669	3332200	+
MSTRG.14591	ddm1_actived	Chr4	3365825	3368666	+
MSTRG.14592	ddm1_actived	Chr4	3371432	3468285	-
MSTRG.14594	ddm1_actived	Chr4	3457330	3459013	-
MSTRG.14595	ddm1_actived	Chr4	3409982	3418124	+
MSTRG.14598	ddm1_actived	Chr4	3445272	3445938	-
MSTRG.14599	ddm1_actived	Chr4	3463794	3468475	+
MSTRG.14600	ddm1_actived	Chr4	3479646	3481600	+
MSTRG.14603	ddm1_actived	Chr4	3501602	3506729	-
MSTRG.14606	ddm1_actived	Chr4	3518550	3521176	+
MSTRG.14608	ddm1_actived	Chr4	3526049	3527065	+
MSTRG.14620	ddm1_actived	Chr4	3648324	3650529	+
MSTRG.14630	ddm1_actived	Chr4	3720278	3721066	+
MSTRG.14631	ddm1_actived	Chr4	3726047	3729265	+
MSTRG.14635	ddm1_actived	Chr4	3767241	3767895	+
MSTRG.14637	ddm1_actived	Chr4	3790371	3792547	-
MSTRG.14639	ddm1_actived	Chr4	3839307	3869646	-
MSTRG.14640	ddm1_actived	Chr4	3839467	3869646	+
MSTRG.14642	ddm1_actived	Chr4	3860328	3864596	-
MSTRG.14648	ddm1_actived	Chr4	3912899	3914496	+
MSTRG.14649	ddm1_actived	Chr4	3915031	3916533	-
MSTRG.14660	ddm1_actived	Chr4	4017027	4022323	-
MSTRG.14666	ddm1_actived	Chr4	4077850	4080641	+
MSTRG.14680	ddm1_actived	Chr4	4325914	4329402	+
MSTRG.14682	ddm1_actived	Chr4	4340259	4341388	+
MSTRG.14685	ddm1_actived	Chr4	4349764	4352614	-
MSTRG.14688	ddm1_actived	Chr4	4373429	4376673	+
MSTRG.14689	ddm1_actived	Chr4	4394435	4395487	+
MSTRG.14692	ddm1_actived	Chr4	4401868	4406756	-
MSTRG.14696	ddm1_actived	Chr4	4442611	4445925	-
MSTRG.14700	ddm1_actived	Chr4	4519171	4521032	-
MSTRG.14703	ddm1_actived	Chr4	4620197	4621244	-
MSTRG.14706	ddm1_actived	Chr4	4641287	4641937	-
MSTRG.14711	ddm1_actived	Chr4	4761425	4777893	+
MSTRG.14713	ddm1_actived	Chr4	4796682	4799795	+
MSTRG.14719	ddm1_actived	Chr4	4835304	4838221	+
MSTRG.14720	ddm1_actived	Chr4	4842806	4843831	-
MSTRG.14727	ddm1_actived	Chr4	4890705	4892246	+
MSTRG.14732	ddm1_actived	Chr4	4980809	4983811	-
MSTRG.14733	ddm1_actived	Chr4	4985501	4988751	-
MSTRG.14734	ddm1_actived	Chr4	4990152	4991662	+
MSTRG.14735	ddm1_actived	Chr4	4994573	4997757	-
MSTRG.14738	ddm1_actived	Chr4	5051944	5052983	+
MSTRG.14789	ddm1_actived	Chr4	5560169	5560983	-
MSTRG.14809	ddm1_actived	Chr4	5752213	5753003	+
MSTRG.14830	ddm1_actived	Chr4	5913730	5915178	+
MSTRG.14839	ddm1_actived	Chr4	5943464	5946436	+
MSTRG.14970	ddm1_actived	Chr4	6725039	6726019	+
MSTRG.15070	ddm1_actived	Chr4	7358127	7358830	+
MSTRG.15562	ddm1_actived	Chr4	9795882	9797164	-
MSTRG.15667	ddm1_actived	Chr4	10268150	10269157	+
MSTRG.18815	ddm1_actived	Chr5	5217666	5218426	+
MSTRG.18923	ddm1_actived	Chr5	5630292	5632073	+
MSTRG.19341	ddm1_actived	Chr5	7414929	7415783	-
MSTRG.19678	ddm1_actived	Chr5	9344567	9347065	-
MSTRG.19696	ddm1_actived	Chr5	9461543	9462477	+
MSTRG.19743	ddm1_actived	Chr5	9710666	9712531	-
MSTRG.19749	ddm1_actived	Chr5	9760626	9762102	+
MSTRG.19774	ddm1_actived	Chr5	9938378	9940536	-
MSTRG.19777	ddm1_actived	Chr5	9949083	9954005	-
MSTRG.19779	ddm1_actived	Chr5	9954388	9955796	+
MSTRG.19796	ddm1_actived	Chr5	10075848	10077843	+
MSTRG.19806	ddm1_actived	Chr5	10144884	10198660	+
MSTRG.19813	ddm1_actived	Chr5	10195287	10196474	-
MSTRG.19827	ddm1_actived	Chr5	10365552	10369186	-
MSTRG.19831	ddm1_actived	Chr5	10397914	10400242	+
MSTRG.19833	ddm1_actived	Chr5	10419581	10420668	+
MSTRG.19840	ddm1_actived	Chr5	10501927	10502830	+
MSTRG.19841	ddm1_actived	Chr5	10503626	10504676	+
MSTRG.19843	ddm1_actived	Chr5	10507938	10509665	-
MSTRG.19864	ddm1_actived	Chr5	10757245	10759929	-
MSTRG.19865	ddm1_actived	Chr5	10758060	10760057	+
MSTRG.19871	ddm1_actived	Chr5	10801923	10803174	+
MSTRG.19877	ddm1_actived	Chr5	10843363	10845604	-
MSTRG.19884	ddm1_actived	Chr5	10894068	10895181	-
MSTRG.19886	ddm1_actived	Chr5	10904902	10905547	-
MSTRG.19889	ddm1_actived	Chr5	10940033	10959281	+
MSTRG.19890	ddm1_actived	Chr5	10946407	10953649	-
MSTRG.19894	ddm1_actived	Chr5	11076173	11079069	+
MSTRG.19896	ddm1_actived	Chr5	11093067	11095754	+
MSTRG.19901	ddm1_actived	Chr5	11122078	11213948	+
MSTRG.19905	ddm1_actived	Chr5	11171316	11174212	-
MSTRG.19906	ddm1_actived	Chr5	11190120	11193818	-
MSTRG.19908	ddm1_actived	Chr5	11194018	11194469	+
MSTRG.19909	ddm1_actived	Chr5	11199811	11202866	-
MSTRG.19915	ddm1_actived	Chr5	11321408	11326614	-
MSTRG.19917	ddm1_actived	Chr5	11345413	11346558	+
MSTRG.19922	ddm1_actived	Chr5	11458799	11461106	+
MSTRG.19929	ddm1_actived	Chr5	11534470	11537541	-
MSTRG.19930	ddm1_actived	Chr5	11550303	11551379	+
MSTRG.19931	ddm1_actived	Chr5	11558982	11562290	+
MSTRG.19932	ddm1_actived	Chr5	11589050	11592187	+
MSTRG.19935	ddm1_actived	Chr5	11623649	11631259	-
MSTRG.19936	ddm1_actived	Chr5	11635347	11635976	+
MSTRG.19938	ddm1_actived	Chr5	11641605	11646541	-
MSTRG.19941	ddm1_actived	Chr5	11696494	11816338	-
MSTRG.19950	ddm1_actived	Chr5	11838480	11998827	+
MSTRG.19958	ddm1_actived	Chr5	12100113	12102366	-
MSTRG.19972	ddm1_actived	Chr5	12293740	12296636	+
MSTRG.19974	ddm1_actived	Chr5	12308443	12310257	+
MSTRG.19975	ddm1_actived	Chr5	12335247	12336623	-
MSTRG.19978	ddm1_actived	Chr5	12353681	12354308	-
MSTRG.19979	ddm1_actived	Chr5	12370477	12372917	-
MSTRG.19980	ddm1_actived	Chr5	12386155	12389043	+
MSTRG.19981	ddm1_actived	Chr5	12441168	12444935	-
MSTRG.20000	ddm1_actived	Chr5	12623675	12634905	+
MSTRG.20006	ddm1_actived	Chr5	12730291	12732245	+
MSTRG.20007	ddm1_actived	Chr5	12750874	12752973	-
MSTRG.20015	ddm1_actived	Chr5	12945962	12949211	-
MSTRG.20018	ddm1_actived	Chr5	12966735	12969482	-
MSTRG.20023	ddm1_actived	Chr5	13001686	13008078	+
MSTRG.20067	ddm1_actived	Chr5	13410370	13412976	+
MSTRG.20077	ddm1_actived	Chr5	13566852	13568268	+
MSTRG.20102	ddm1_actived	Chr5	13800070	13801040	+
MSTRG.20128	ddm1_actived	Chr5	14052087	14055990	-
MSTRG.20179	ddm1_actived	Chr5	14588447	14589510	-
MSTRG.20245	ddm1_actived	Chr5	15155125	15156161	+
MSTRG.20280	ddm1_actived	Chr5	15454258	15454965	+
MSTRG.20312	ddm1_actived	Chr5	15636347	15637472	-
MSTRG.20699	ddm1_actived	Chr5	17603328	17605834	+
MSTRG.20955	ddm1_actived	Chr5	18933119	18934277	-
MSTRG.21278	ddm1_actived	Chr5	20630630	20632279	+
MSTRG.2207	ddm1_actived	Chr1	9175579	9177636	+
MSTRG.2258	ddm1_actived	Chr1	9371158	9373177	-
MSTRG.2583	ddm1_actived	Chr1	11102540	11103702	+
MSTRG.2621	ddm1_actived	Chr1	11302618	11305124	-
MSTRG.2720	ddm1_actived	Chr1	11900767	11901590	-
MSTRG.2763	ddm1_actived	Chr1	12139166	12139931	+
MSTRG.2764	ddm1_actived	Chr1	12139940	12142518	-
MSTRG.2771	ddm1_actived	Chr1	12172878	12177030	-
MSTRG.2832	ddm1_actived	Chr1	12627474	12630165	+
MSTRG.2840	ddm1_actived	Chr1	12732192	12733107	-
MSTRG.2874	ddm1_actived	Chr1	12995247	12996260	-
MSTRG.2877	ddm1_actived	Chr1	13021911	13022652	-
MSTRG.2887	ddm1_actived	Chr1	13126825	13128064	-
MSTRG.2910	ddm1_actived	Chr1	13282158	13283278	-
MSTRG.2912	ddm1_actived	Chr1	13286130	13288895	-
MSTRG.2913	ddm1_actived	Chr1	13295116	13297398	+
MSTRG.2915	ddm1_actived	Chr1	13418423	13421117	-
MSTRG.2918	ddm1_actived	Chr1	13446073	13447844	+
MSTRG.2923	ddm1_actived	Chr1	13477760	13478410	+
MSTRG.2926	ddm1_actived	Chr1	13486034	13486908	-
MSTRG.2928	ddm1_actived	Chr1	13501255	13502580	+
MSTRG.2956	ddm1_actived	Chr1	13778342	13782024	+
MSTRG.2964	ddm1_actived	Chr1	13838494	13853594	-
MSTRG.2965	ddm1_actived	Chr1	13842044	13843199	+
MSTRG.2966	ddm1_actived	Chr1	13857774	13859107	+
MSTRG.2990	ddm1_actived	Chr1	14095602	14096703	-
MSTRG.2992	ddm1_actived	Chr1	14111115	14113542	-
MSTRG.2999	ddm1_actived	Chr1	14192411	14195499	+
MSTRG.3001	ddm1_actived	Chr1	14197004	14197706	-
MSTRG.3008	ddm1_actived	Chr1	14286732	14287809	+
MSTRG.3012	ddm1_actived	Chr1	14323942	14325862	+
MSTRG.3014	ddm1_actived	Chr1	14377887	14380015	+
MSTRG.3017	ddm1_actived	Chr1	14423592	14482538	+
MSTRG.3025	ddm1_actived	Chr1	14590698	14593774	-
MSTRG.3039	ddm1_actived	Chr1	14864778	14875147	-
MSTRG.3050	ddm1_actived	Chr1	15061080	15069520	-
MSTRG.3054	ddm1_actived	Chr1	15155044	15158559	+
MSTRG.3063	ddm1_actived	Chr1	15398393	15405019	-
MSTRG.3064	ddm1_actived	Chr1	15417132	15420727	+
MSTRG.3075	ddm1_actived	Chr1	15670743	15673537	-
MSTRG.3081	ddm1_actived	Chr1	15704950	15710049	-
MSTRG.3084	ddm1_actived	Chr1	15744575	15745081	+
MSTRG.3095	ddm1_actived	Chr1	15962075	15964550	+
MSTRG.3099	ddm1_actived	Chr1	15992824	15993970	-
MSTRG.3100	ddm1_actived	Chr1	15998393	15999709	+
MSTRG.3105	ddm1_actived	Chr1	16085481	16088428	+
MSTRG.3107	ddm1_actived	Chr1	16111331	16114249	+
MSTRG.3110	ddm1_actived	Chr1	16122678	16124050	+
MSTRG.3124	ddm1_actived	Chr1	16285667	16286786	-
MSTRG.3126	ddm1_actived	Chr1	16297670	16298719	-
MSTRG.3133	ddm1_actived	Chr1	16365070	16366483	-
MSTRG.3141	ddm1_actived	Chr1	16459066	16459922	-
MSTRG.3206	ddm1_actived	Chr1	17024354	17030406	+
MSTRG.3247	ddm1_actived	Chr1	17312498	17315162	+
MSTRG.3286	ddm1_actived	Chr1	17489006	17490193	-
MSTRG.3516	ddm1_actived	Chr1	18850451	18854410	-
MSTRG.3655	ddm1_actived	Chr1	19596308	19599676	-
MSTRG.379	ddm1_actived	Chr1	1441789	1442645	+
MSTRG.4672	ddm1_actived	Chr1	25056903	25058267	+
MSTRG.4675	ddm1_actived	Chr1	25095897	25096889	+
MSTRG.5642	ddm1_actived	Chr1	29379678	29380373	+
MSTRG.5900	ddm1_actived	Chr2	38257	38830	+
MSTRG.6042	ddm1_actived	Chr2	823902	825543	+
MSTRG.6126	ddm1_actived	Chr2	1267582	1268464	-
MSTRG.6140	ddm1_actived	Chr2	1387214	1388927	+
MSTRG.6175	ddm1_actived	Chr2	1601390	1602394	-
MSTRG.6187	ddm1_actived	Chr2	1671022	1735229	+
MSTRG.6212	ddm1_actived	Chr2	1767452	1768506	+
MSTRG.6219	ddm1_actived	Chr2	1801857	1803765	-
MSTRG.6229	ddm1_actived	Chr2	1888759	1889814	-
MSTRG.6251	ddm1_actived	Chr2	2107895	2109270	-
MSTRG.6252	ddm1_actived	Chr2	2109739	2115403	-
MSTRG.6273	ddm1_actived	Chr2	2278865	2279388	+
MSTRG.6276	ddm1_actived	Chr2	2295010	2296975	+
MSTRG.6304	ddm1_actived	Chr2	2508117	2509502	+
MSTRG.6309	ddm1_actived	Chr2	2552601	2554885	+
MSTRG.6317	ddm1_actived	Chr2	2617547	2619244	+
MSTRG.6319	ddm1_actived	Chr2	2632258	2635316	+
MSTRG.6325	ddm1_actived	Chr2	2678721	2680595	-
MSTRG.6330	ddm1_actived	Chr2	2728541	2729190	-
MSTRG.6334	ddm1_actived	Chr2	2772118	2773638	+
MSTRG.6336	ddm1_actived	Chr2	2805088	2806601	+
MSTRG.6337	ddm1_actived	Chr2	2808484	2809518	-
MSTRG.6353	ddm1_actived	Chr2	2945885	2946497	+
MSTRG.6365	ddm1_actived	Chr2	3198706	3211338	+
MSTRG.6389	ddm1_actived	Chr2	3432795	3438622	-
MSTRG.6417	ddm1_actived	Chr2	3586611	3587167	+
MSTRG.6420	ddm1_actived	Chr2	3595877	3597620	-
MSTRG.6427	ddm1_actived	Chr2	3637249	3651008	-
MSTRG.6435	ddm1_actived	Chr2	3726359	3727966	+
MSTRG.6447	ddm1_actived	Chr2	3847044	3849000	-
MSTRG.6448	ddm1_actived	Chr2	3852818	3854036	+
MSTRG.6452	ddm1_actived	Chr2	3913883	3925752	-
MSTRG.6455	ddm1_actived	Chr2	3943532	3945212	+
MSTRG.6464	ddm1_actived	Chr2	4040711	4043830	+
MSTRG.6471	ddm1_actived	Chr2	4165888	4168924	+
MSTRG.6475	ddm1_actived	Chr2	4197884	4202707	-
MSTRG.6513	ddm1_actived	Chr2	4685043	4687859	+
MSTRG.6518	ddm1_actived	Chr2	4721368	4723122	+
MSTRG.6519	ddm1_actived	Chr2	4723702	4727270	-
MSTRG.6520	ddm1_actived	Chr2	4727517	4736289	+
MSTRG.6526	ddm1_actived	Chr2	4822793	4823795	+
MSTRG.6527	ddm1_actived	Chr2	4830137	4831923	+
MSTRG.6537	ddm1_actived	Chr2	4907008	4908377	-
MSTRG.6547	ddm1_actived	Chr2	4962503	4964294	-
MSTRG.6550	ddm1_actived	Chr2	4994771	4995888	+
MSTRG.6558	ddm1_actived	Chr2	5045751	5047913	-
MSTRG.6563	ddm1_actived	Chr2	5086634	5090159	-
MSTRG.6574	ddm1_actived	Chr2	5216748	5217866	-
MSTRG.6583	ddm1_actived	Chr2	5338573	5341401	-
MSTRG.6588	ddm1_actived	Chr2	5365988	5371210	+
MSTRG.6600	ddm1_actived	Chr2	5517655	5520460	+
MSTRG.6601	ddm1_actived	Chr2	5524019	5527088	-
MSTRG.6605	ddm1_actived	Chr2	5585272	5591439	-
MSTRG.6631	ddm1_actived	Chr2	5763491	5764421	+
MSTRG.6650	ddm1_actived	Chr2	5944700	5945575	-
MSTRG.6671	ddm1_actived	Chr2	6074101	6075529	+
MSTRG.6680	ddm1_actived	Chr2	6175974	6176925	-
MSTRG.6691	ddm1_actived	Chr2	6263365	6264308	-
MSTRG.6696	ddm1_actived	Chr2	6305540	6307092	+
MSTRG.6712	ddm1_actived	Chr2	6447010	6471740	+
MSTRG.6732	ddm1_actived	Chr2	6580952	6583144	-
MSTRG.6773	ddm1_actived	Chr2	6877774	6886004	-
MSTRG.6775	ddm1_actived	Chr2	6882269	6886004	+
MSTRG.6792	ddm1_actived	Chr2	6954119	6958790	+
MSTRG.6801	ddm1_actived	Chr2	7005358	7008278	+
MSTRG.6806	ddm1_actived	Chr2	7065013	7066709	-
MSTRG.7321	ddm1_actived	Chr2	9652501	9655024	+
MSTRG.7394	ddm1_actived	Chr2	10002442	10004976	+
MSTRG.7461	ddm1_actived	Chr2	10353303	10358696	+
MSTRG.1004	non-ddm1_actived	Chr1	3960911	3961694	-
MSTRG.10101	non-ddm1_actived	Chr3	2296022	2297759	-
MSTRG.10108	non-ddm1_actived	Chr3	2317445	2321194	-
MSTRG.10575	non-ddm1_actived	Chr3	4136992	4137689	-
MSTRG.10768	non-ddm1_actived	Chr3	4967141	4970274	-
MSTRG.10842	non-ddm1_actived	Chr3	5260625	5265678	+
MSTRG.10990	non-ddm1_actived	Chr3	5861453	5862446	+
MSTRG.11329	non-ddm1_actived	Chr3	7387476	7388288	+
MSTRG.11343	non-ddm1_actived	Chr3	7441178	7441668	+
MSTRG.11734	non-ddm1_actived	Chr3	9555915	9557604	-
MSTRG.11755	non-ddm1_actived	Chr3	9665583	9669423	+
MSTRG.11780	non-ddm1_actived	Chr3	9782099	9783506	+
MSTRG.11916	non-ddm1_actived	Chr3	10400126	10401424	-
MSTRG.11960	non-ddm1_actived	Chr3	10737921	10738559	+
MSTRG.12056	non-ddm1_actived	Chr3	11498853	11501412	-
MSTRG.12086	non-ddm1_actived	Chr3	11860560	11861610	-
MSTRG.12089	non-ddm1_actived	Chr3	11924774	11925965	+
MSTRG.12140	non-ddm1_actived	Chr3	12559364	12560065	-
MSTRG.12156	non-ddm1_actived	Chr3	12731155	12731947	-
MSTRG.12172	non-ddm1_actived	Chr3	12982865	12983135	-
MSTRG.12180	non-ddm1_actived	Chr3	13137191	13137861	+
MSTRG.12251	non-ddm1_actived	Chr3	14104661	14105549	+
MSTRG.12260	non-ddm1_actived	Chr3	14151688	14156608	-
MSTRG.12262	non-ddm1_actived	Chr3	14193702	14204799	-
MSTRG.12265	non-ddm1_actived	Chr3	14238948	14240938	+
MSTRG.12321	non-ddm1_actived	Chr3	14917014	14918687	+
MSTRG.12362	non-ddm1_actived	Chr3	15406023	15409007	+
MSTRG.12381	non-ddm1_actived	Chr3	15560628	15562189	+
MSTRG.12404	non-ddm1_actived	Chr3	15722013	15722694	+
MSTRG.12438	non-ddm1_actived	Chr3	15983311	16020946	+
MSTRG.12472	non-ddm1_actived	Chr3	16341001	16341937	+
MSTRG.12525	non-ddm1_actived	Chr3	16755220	16756297	-
MSTRG.12578	non-ddm1_actived	Chr3	17065307	17066573	-
MSTRG.12616	non-ddm1_actived	Chr3	17254370	17255255	-
MSTRG.12653	non-ddm1_actived	Chr3	17434262	17441243	-
MSTRG.12654	non-ddm1_actived	Chr3	17445017	17452952	+
MSTRG.13130	non-ddm1_actived	Chr3	19548984	19549598	+
MSTRG.1321	non-ddm1_actived	Chr1	5223139	5224131	-
MSTRG.13722	non-ddm1_actived	Chr3	22076459	22078354	-
MSTRG.13746	non-ddm1_actived	Chr3	22173663	22175297	-
MSTRG.13792	non-ddm1_actived	Chr3	22365415	22366170	-
MSTRG.13833	non-ddm1_actived	Chr3	22575486	22577569	+
MSTRG.13856	non-ddm1_actived	Chr3	22655782	22656329	+
MSTRG.14188	non-ddm1_actived	Chr4	630469	630892	+
MSTRG.14217	non-ddm1_actived	Chr4	761558	762601	+
MSTRG.14239	non-ddm1_actived	Chr4	876785	879733	-
MSTRG.14306	non-ddm1_actived	Chr4	1200518	1203380	-
MSTRG.14389	non-ddm1_actived	Chr4	1644176	1645111	-
MSTRG.14411	non-ddm1_actived	Chr4	1868765	1876530	-
MSTRG.14461	non-ddm1_actived	Chr4	2181211	2194314	+
MSTRG.14489	non-ddm1_actived	Chr4	2375444	2376361	-
MSTRG.14514	non-ddm1_actived	Chr4	2506821	2507986	-
MSTRG.14586	non-ddm1_actived	Chr4	3342312	3343296	-
MSTRG.14605	non-ddm1_actived	Chr4	3507126	3507999	.
MSTRG.14636	non-ddm1_actived	Chr4	3780620	3781315	+
MSTRG.14646	non-ddm1_actived	Chr4	3888475	3889284	+
MSTRG.14653	non-ddm1_actived	Chr4	3939249	3940741	-
MSTRG.14654	non-ddm1_actived	Chr4	3939279	3940775	+
MSTRG.14659	non-ddm1_actived	Chr4	3997361	4033913	+
MSTRG.14675	non-ddm1_actived	Chr4	4275071	4278721	+
MSTRG.14678	non-ddm1_actived	Chr4	4309934	4312021	+
MSTRG.14683	non-ddm1_actived	Chr4	4341400	4341977	-
MSTRG.14691	non-ddm1_actived	Chr4	4388197	4421960	-
MSTRG.14697	non-ddm1_actived	Chr4	4442611	4444122	+
MSTRG.14725	non-ddm1_actived	Chr4	4866640	4868358	+
MSTRG.14800	non-ddm1_actived	Chr4	5644307	5645128	+
MSTRG.14812	non-ddm1_actived	Chr4	5770260	5772002	-
MSTRG.1500	non-ddm1_actived	Chr1	5899966	5901073	+
MSTRG.151	non-ddm1_actived	Chr1	557275	558933	+
MSTRG.15112	non-ddm1_actived	Chr4	7563055	7563962	-
MSTRG.15113	non-ddm1_actived	Chr4	7563110	7563990	+
MSTRG.15156	non-ddm1_actived	Chr4	7842963	7847462	+
MSTRG.15166	non-ddm1_actived	Chr4	7895885	7898475	-
MSTRG.15960	non-ddm1_actived	Chr4	11860444	11878920	-
MSTRG.16102	non-ddm1_actived	Chr4	12570566	12571552	-
MSTRG.17218	non-ddm1_actived	Chr4	17280858	17282718	-
MSTRG.17219	non-ddm1_actived	Chr4	17280578	17282718	+
MSTRG.17478	non-ddm1_actived	Chr4	18296797	18308842	+
MSTRG.17790	non-ddm1_actived	Chr5	896661	902762	-
MSTRG.17880	non-ddm1_actived	Chr5	1322553	1335061	+
MSTRG.17888	non-ddm1_actived	Chr5	1341812	1343443	-
MSTRG.17909	non-ddm1_actived	Chr5	1420607	1422628	-
MSTRG.1845	non-ddm1_actived	Chr1	7443219	7444062	+
MSTRG.19158	non-ddm1_actived	Chr5	6630915	6631955	+
MSTRG.19159	non-ddm1_actived	Chr5	6634158	6635117	-
MSTRG.19166	non-ddm1_actived	Chr5	6663619	6664435	-
MSTRG.1930	non-ddm1_actived	Chr1	7908529	7909582	-
MSTRG.19344	non-ddm1_actived	Chr5	7420434	7421276	+
MSTRG.19484	non-ddm1_actived	Chr5	8209289	8214672	-
MSTRG.19517	non-ddm1_actived	Chr5	8373110	8373829	-
MSTRG.19537	non-ddm1_actived	Chr5	8468334	8469284	-
MSTRG.19619	non-ddm1_actived	Chr5	8955801	8956679	-
MSTRG.19838	non-ddm1_actived	Chr5	10489756	10490196	+
MSTRG.19856	non-ddm1_actived	Chr5	10615237	10617863	+
MSTRG.19885	non-ddm1_actived	Chr5	10894106	10895162	+
MSTRG.19942	non-ddm1_actived	Chr5	11686953	11715338	+
MSTRG.19949	non-ddm1_actived	Chr5	11830762	11945583	-
MSTRG.19951	non-ddm1_actived	Chr5	12007456	12017613	-
MSTRG.20013	non-ddm1_actived	Chr5	12922464	12923139	+
MSTRG.20114	non-ddm1_actived	Chr5	13908418	13910260	+
MSTRG.20173	non-ddm1_actived	Chr5	14550298	14550825	-
MSTRG.20212	non-ddm1_actived	Chr5	14884331	14887040	-
MSTRG.20607	non-ddm1_actived	Chr5	17133042	17134260	+
MSTRG.20664	non-ddm1_actived	Chr5	17430280	17431876	-
MSTRG.20692	non-ddm1_actived	Chr5	17559517	17568802	+
MSTRG.20776	non-ddm1_actived	Chr5	17951512	17959766	+
MSTRG.20810	non-ddm1_actived	Chr5	18131794	18132497	-
MSTRG.20834	non-ddm1_actived	Chr5	18238095	18238839	-
MSTRG.20871	non-ddm1_actived	Chr5	18495016	18495821	-
MSTRG.21099	non-ddm1_actived	Chr5	19623467	19624231	-
MSTRG.2131	non-ddm1_actived	Chr1	8827130	8835112	+
MSTRG.2132	non-ddm1_actived	Chr1	8827129	8829371	-
MSTRG.21342	non-ddm1_actived	Chr5	20904646	20905566	-
MSTRG.2138	non-ddm1_actived	Chr1	8861914	8862490	+
MSTRG.21654	non-ddm1_actived	Chr5	22461760	22462579	+
MSTRG.21696	non-ddm1_actived	Chr5	22627658	22633351	-
MSTRG.22331	non-ddm1_actived	Chr5	25469992	25471992	-
MSTRG.22790	non-ddm1_actived	ChrM	47307	47710	-
MSTRG.237	non-ddm1_actived	Chr1	874908	875900	-
MSTRG.243	non-ddm1_actived	Chr1	885581	890027	-
MSTRG.245	non-ddm1_actived	Chr1	892874	894310	+
MSTRG.2596	non-ddm1_actived	Chr1	11170948	11172066	+
MSTRG.2608	non-ddm1_actived	Chr1	11228894	11230058	+
MSTRG.275	non-ddm1_actived	Chr1	1008489	1011062	+
MSTRG.2825	non-ddm1_actived	Chr1	12582128	12582819	+
MSTRG.2845	non-ddm1_actived	Chr1	12751222	12752727	+
MSTRG.2891	non-ddm1_actived	Chr1	13145600	13146823	+
MSTRG.2893	non-ddm1_actived	Chr1	13145600	13146823	-
MSTRG.2911	non-ddm1_actived	Chr1	13282369	13283148	+
MSTRG.3016	non-ddm1_actived	Chr1	14421226	14455346	-
MSTRG.3033	non-ddm1_actived	Chr1	14832707	14834246	-
MSTRG.3036	non-ddm1_actived	Chr1	14847780	14857865	+
MSTRG.3043	non-ddm1_actived	Chr1	14875865	14884151	-
MSTRG.3061	non-ddm1_actived	Chr1	15300358	15306930	-
MSTRG.3161	non-ddm1_actived	Chr1	16637851	16643467	-
MSTRG.3234	non-ddm1_actived	Chr1	17252916	17253978	+
MSTRG.3276	non-ddm1_actived	Chr1	17443180	17444213	+
MSTRG.3448	non-ddm1_actived	Chr1	18447621	18448238	+
MSTRG.3637	non-ddm1_actived	Chr1	19496504	19497725	+
MSTRG.388	non-ddm1_actived	Chr1	1477469	1478443	-
MSTRG.402	non-ddm1_actived	Chr1	1523671	1524822	+
MSTRG.4043	non-ddm1_actived	Chr1	21522849	21523729	-
MSTRG.4060	non-ddm1_actived	Chr1	21614545	21617011	-
MSTRG.4077	non-ddm1_actived	Chr1	21742883	21743994	-
MSTRG.4374	non-ddm1_actived	Chr1	23435030	23435778	-
MSTRG.4625	non-ddm1_actived	Chr1	24788866	24790411	+
MSTRG.4683	non-ddm1_actived	Chr1	25137205	25137962	-
MSTRG.4844	non-ddm1_actived	Chr1	25891013	25891780	-
MSTRG.4873	non-ddm1_actived	Chr1	26036546	26037716	+
MSTRG.4994	non-ddm1_actived	Chr1	26583354	26584789	+
MSTRG.501	non-ddm1_actived	Chr1	1942803	1944967	-
MSTRG.5319	non-ddm1_actived	Chr1	27984294	27985230	-
MSTRG.5375	non-ddm1_actived	Chr1	28196857	28204279	-
MSTRG.5437	non-ddm1_actived	Chr1	28515270	28515909	-
MSTRG.5554	non-ddm1_actived	Chr1	28981498	28983477	+
MSTRG.5734	non-ddm1_actived	Chr1	29745990	29746843	+
MSTRG.5744	non-ddm1_actived	Chr1	29804470	29809506	-
MSTRG.5765	non-ddm1_actived	Chr1	29911182	29914615	-
MSTRG.5876	non-ddm1_actived	Chr1	30363494	30364765	+
MSTRG.5898	non-ddm1_actived	Chr2	9918	10372	-
MSTRG.6139	non-ddm1_actived	Chr2	1382481	1383512	-
MSTRG.6181	non-ddm1_actived	Chr2	1629671	1630651	-
MSTRG.6241	non-ddm1_actived	Chr2	2023289	2023997	+
MSTRG.6349	non-ddm1_actived	Chr2	2919871	2922153	-
MSTRG.6352	non-ddm1_actived	Chr2	2935033	2936139	+
MSTRG.6364	non-ddm1_actived	Chr2	3141969	3143096	-
MSTRG.6366	non-ddm1_actived	Chr2	3225828	3230940	-
MSTRG.6380	non-ddm1_actived	Chr2	3324874	3326039	+
MSTRG.6382	non-ddm1_actived	Chr2	3332772	3333469	+
MSTRG.6430	non-ddm1_actived	Chr2	3671929	3672761	-
MSTRG.6487	non-ddm1_actived	Chr2	4382658	4383188	-
MSTRG.6530	non-ddm1_actived	Chr2	4864754	4865573	-
MSTRG.6640	non-ddm1_actived	Chr2	5864858	5865625	-
MSTRG.6676	non-ddm1_actived	Chr2	6121198	6122128	+
MSTRG.6685	non-ddm1_actived	Chr2	6212190	6212988	+
MSTRG.6711	non-ddm1_actived	Chr2	6440042	6440758	+
MSTRG.6724	non-ddm1_actived	Chr2	6518840	6525240	+
MSTRG.6744	non-ddm1_actived	Chr2	6644267	6645521	-
MSTRG.6752	non-ddm1_actived	Chr2	6738474	6740860	+
MSTRG.6774	non-ddm1_actived	Chr2	6876579	6877434	+
MSTRG.6905	non-ddm1_actived	Chr2	7632765	7633819	+
MSTRG.6975	non-ddm1_actived	Chr2	7995729	7997185	-
MSTRG.7025	non-ddm1_actived	Chr2	8353242	8355947	+
MSTRG.7161	non-ddm1_actived	Chr2	8930990	8935496	-
MSTRG.7206	non-ddm1_actived	Chr2	9074660	9079622	-
MSTRG.7331	non-ddm1_actived	Chr2	9713555	9714341	-
MSTRG.7403	non-ddm1_actived	Chr2	10064157	10067455	+
MSTRG.7439	non-ddm1_actived	Chr2	10247844	10254641	-
MSTRG.7442	non-ddm1_actived	Chr2	10271113	10273602	-
MSTRG.7446	non-ddm1_actived	Chr2	10285905	10286799	+
MSTRG.7492	non-ddm1_actived	Chr2	10538877	10549441	-
MSTRG.7537	non-ddm1_actived	Chr2	10770667	10774294	-
MSTRG.7634	non-ddm1_actived	Chr2	11277961	11279038	+
MSTRG.7644	non-ddm1_actived	Chr2	11327537	11331858	+
MSTRG.7706	non-ddm1_actived	Chr2	11688256	11689291	+
MSTRG.7715	non-ddm1_actived	Chr2	11721536	11722492	-
MSTRG.7999	non-ddm1_actived	Chr2	13170871	13177223	+
MSTRG.8056	non-ddm1_actived	Chr2	13446003	13446715	+
MSTRG.8155	non-ddm1_actived	Chr2	13909384	13911033	+
MSTRG.8687	non-ddm1_actived	Chr2	16276941	16279352	-
MSTRG.8748	non-ddm1_actived	Chr2	16539326	16540453	-
MSTRG.8856	non-ddm1_actived	Chr2	16982371	16982835	-
MSTRG.9241	non-ddm1_actived	Chr2	18562041	18563718	+
MSTRG.9245	non-ddm1_actived	Chr2	18570567	18572196	-
MSTRG.9264	non-ddm1_actived	Chr2	18659231	18666413	-
MSTRG.9833	non-ddm1_actived	Chr3	1198011	1200168	+
MSTRG.9852	non-ddm1_actived	Chr3	1284729	1286562	-
MSTRG.991	non-ddm1_actived	Chr1	3895149	3896958	-
MSTRG.9981	non-ddm1_actived	Chr3	1848770	1850542	+

## Sheet: Table S4
Table S4: lincRNA comprised DNA structure varation
ID	LincRNA ID	LincRNA Chromosome	LincRNA Start	LincRNA Ends	LincRNA type	Chromosome	SV Start	SV Ends	SV ID	SV Type
1	MSTRG.10850	3	5283207	5286508	ddm1_actived	3	5285662	5285662	cuteSV.BND.55	BND
2	MSTRG.12098	3	12004182	12442140	ddm1_actived	3	12245180	12245180	cuteSV.INS.192	INS
2	MSTRG.12098	3	12004182	12442140	ddm1_actived	3	12254209	12254209	cuteSV.DEL.200	DEL
3	MSTRG.12113	3	12212589	12249192	ddm1_actived	3	12245180	12245180	cuteSV.INS.192	INS
4	MSTRG.12261	3	14191673	14204799	ddm1_actived	3	14201470	14201470	cuteSV.INS.226	INS
4	MSTRG.12261	3	14191673	14204799	ddm1_actived	3	14192875	14192875	cuteSV.INS.262	INS
4	MSTRG.12261	3	14191673	14204799	ddm1_actived	3	14192930	14192930	cuteSV.INS.263	INS
4	MSTRG.12261	3	14191673	14204799	ddm1_actived	3	14200049	14200049	cuteSV.INS.268	INS
4	MSTRG.12261	3	14191673	14204799	ddm1_actived	3	14201442	14201442	cuteSV.INS.270	INS
4	MSTRG.12261	3	14191673	14204799	ddm1_actived	3	14193699	14193699	cuteSV.DEL.271	DEL
4	MSTRG.12261	3	14191673	14204799	ddm1_actived	3	14194869	14194869	cuteSV.DEL.272	DEL
4	MSTRG.12261	3	14191673	14204799	ddm1_actived	3	14195104	14195104	cuteSV.DEL.273	DEL
4	MSTRG.12261	3	14191673	14204799	ddm1_actived	3	14197764	14197764	cuteSV.DEL.276	DEL
5	MSTRG.12262	3	14193702	14204799	non-ddm1_actived	3	14201470	14201470	cuteSV.INS.226	INS
5	MSTRG.12262	3	14193702	14204799	non-ddm1_actived	3	14192875	14192875	cuteSV.INS.262	INS
5	MSTRG.12262	3	14193702	14204799	non-ddm1_actived	3	14192930	14192930	cuteSV.INS.263	INS
5	MSTRG.12262	3	14193702	14204799	non-ddm1_actived	3	14200049	14200049	cuteSV.INS.268	INS
5	MSTRG.12262	3	14193702	14204799	non-ddm1_actived	3	14201442	14201442	cuteSV.INS.270	INS
5	MSTRG.12262	3	14193702	14204799	non-ddm1_actived	3	14193699	14193699	cuteSV.DEL.271	DEL
5	MSTRG.12262	3	14193702	14204799	non-ddm1_actived	3	14194869	14194869	cuteSV.DEL.272	DEL
5	MSTRG.12262	3	14193702	14204799	non-ddm1_actived	3	14195104	14195104	cuteSV.DEL.273	DEL
5	MSTRG.12262	3	14193702	14204799	non-ddm1_actived	3	14197764	14197764	cuteSV.DEL.276	DEL
6	MSTRG.12288	3	14473945	14474941	ddm1_actived	3	14476895	14476895	cuteSV.BND.76	BND
6	MSTRG.12288	3	14473945	14474941	ddm1_actived	3	14476899	14476899	cuteSV.BND.77	BND
7	MSTRG.12289	3	14475218	14478958	ddm1_actived	3	14476895	14476895	cuteSV.BND.76	BND
7	MSTRG.12289	3	14475218	14478958	ddm1_actived	3	14476899	14476899	cuteSV.BND.77	BND
8	MSTRG.12334	3	15133703	15138244	ddm1_actived	3	15132295	15132295	cuteSV.INS.288	INS
9	MSTRG.12404	3	15722013	15722694	non-ddm1_actived	3	15722693	15722693	cuteSV.BND.65	BND
10	MSTRG.14659	4	3997361	4033913	non-ddm1_actived	4	3999581	3999581	cuteSV.DEL.430	DEL
10	MSTRG.14659	4	3997361	4033913	non-ddm1_actived	4	4009669	4009669	cuteSV.DEL.438	DEL
11	MSTRG.19901	5	11122078	11213948	ddm1_actived	5	11185789	11185789	cuteSV.DEL.423	DEL
12	MSTRG.19941	5	11696494	11816338	ddm1_actived	5	11705481	11705481	cuteSV.INS.348	INS
12	MSTRG.19941	5	11696494	11816338	ddm1_actived	5	11709598	11709598	cuteSV.INS.411	INS
12	MSTRG.19941	5	11696494	11816338	ddm1_actived	5	11711928	11711928	cuteSV.INS.414	INS
12	MSTRG.19941	5	11696494	11816338	ddm1_actived	5	11726026	11726026	cuteSV.INS.416	INS
12	MSTRG.19941	5	11696494	11816338	ddm1_actived	5	11726060	11726060	cuteSV.INS.417	INS
12	MSTRG.19941	5	11696494	11816338	ddm1_actived	5	11726184	11726184	cuteSV.INS.418	INS
12	MSTRG.19941	5	11696494	11816338	ddm1_actived	5	11727439	11727439	cuteSV.INS.419	INS
12	MSTRG.19941	5	11696494	11816338	ddm1_actived	5	11727648	11727648	cuteSV.INS.420	INS
12	MSTRG.19941	5	11696494	11816338	ddm1_actived	5	11738067	11738067	cuteSV.INS.422	INS
12	MSTRG.19941	5	11696494	11816338	ddm1_actived	5	11702908	11702908	cuteSV.DEL.430	DEL
12	MSTRG.19941	5	11696494	11816338	ddm1_actived	5	11707685	11707685	cuteSV.DEL.438	DEL
12	MSTRG.19941	5	11696494	11816338	ddm1_actived	5	11734260	11734260	cuteSV.DEL.498	DEL
12	MSTRG.19941	5	11696494	11816338	ddm1_actived	5	11735478	11735478	cuteSV.DEL.501	DEL
12	MSTRG.19941	5	11696494	11816338	ddm1_actived	5	11753639	11753639	cuteSV.DEL.506	DEL
12	MSTRG.19941	5	11696494	11816338	ddm1_actived	5	11785044	11785044	cuteSV.DEL.508	DEL
13	MSTRG.19942	5	11686953	11715338	non-ddm1_actived	5	11705481	11705481	cuteSV.INS.348	INS
13	MSTRG.19942	5	11686953	11715338	non-ddm1_actived	5	11709598	11709598	cuteSV.INS.411	INS
13	MSTRG.19942	5	11686953	11715338	non-ddm1_actived	5	11711928	11711928	cuteSV.INS.414	INS
13	MSTRG.19942	5	11686953	11715338	non-ddm1_actived	5	11702908	11702908	cuteSV.DEL.430	DEL
13	MSTRG.19942	5	11686953	11715338	non-ddm1_actived	5	11707685	11707685	cuteSV.DEL.438	DEL
14	MSTRG.19949	5	11830762	11945583	non-ddm1_actived	5	11860931	11860931	cuteSV.INS.433	INS
14	MSTRG.19949	5	11830762	11945583	non-ddm1_actived	5	11873816	11873816	cuteSV.INS.438	INS
14	MSTRG.19949	5	11830762	11945583	non-ddm1_actived	5	11877004	11877004	cuteSV.INS.440	INS
14	MSTRG.19949	5	11830762	11945583	non-ddm1_actived	5	11930305	11930305	cuteSV.INS.446	INS
14	MSTRG.19949	5	11830762	11945583	non-ddm1_actived	5	11945567	11945567	cuteSV.INS.450	INS
14	MSTRG.19949	5	11830762	11945583	non-ddm1_actived	5	11846229	11846229	cuteSV.DEL.515	DEL
14	MSTRG.19949	5	11830762	11945583	non-ddm1_actived	5	11885784	11885784	cuteSV.DEL.521	DEL
14	MSTRG.19949	5	11830762	11945583	non-ddm1_actived	5	11891942	11891942	cuteSV.DEL.524	DEL
14	MSTRG.19949	5	11830762	11945583	non-ddm1_actived	5	11895132	11895132	cuteSV.DEL.468	DEL
15	MSTRG.19950	5	11838480	11998827	ddm1_actived	5	11860931	11860931	cuteSV.INS.433	INS
15	MSTRG.19950	5	11838480	11998827	ddm1_actived	5	11873816	11873816	cuteSV.INS.438	INS
15	MSTRG.19950	5	11838480	11998827	ddm1_actived	5	11877004	11877004	cuteSV.INS.440	INS
15	MSTRG.19950	5	11838480	11998827	ddm1_actived	5	11930305	11930305	cuteSV.INS.446	INS
15	MSTRG.19950	5	11838480	11998827	ddm1_actived	5	11945567	11945567	cuteSV.INS.450	INS
15	MSTRG.19950	5	11838480	11998827	ddm1_actived	5	11846229	11846229	cuteSV.DEL.515	DEL
15	MSTRG.19950	5	11838480	11998827	ddm1_actived	5	11885784	11885784	cuteSV.DEL.521	DEL
15	MSTRG.19950	5	11838480	11998827	ddm1_actived	5	11891942	11891942	cuteSV.DEL.524	DEL
15	MSTRG.19950	5	11838480	11998827	ddm1_actived	5	11895132	11895132	cuteSV.DEL.468	DEL
15	MSTRG.19950	5	11838480	11998827	ddm1_actived	5	11957492	11957492	cuteSV.DEL.535	DEL
16	MSTRG.3126	1	16297670	16298719	ddm1_actived	1	16296261	16296261	cuteSV.DEL.110	DEL
17	MSTRG.5898	2	9918	10372	non-ddm1_actived	2	10349	10349	cuteSV.BND.30	BND
17	MSTRG.5898	2	9918	10372	non-ddm1_actived	2	8445	8445	cuteSV.BND.43	BND
18	MSTRG.6219	2	1801857	1803765	ddm1_actived	2	1803467	1803467	cuteSV.DEL.111	DEL
19	MSTRG.6520	2	4727517	4736289	ddm1_actived	2	4733716	4733716	cuteSV.DEL.148	DEL

## Sheet: Table S5
Table S5: Arabidopsis population accessions used in RNA-seq
Name	SRA_Sample_ID	GEO_id	Ecotype_id	Country	Area	Tissue
Cvi-0	SAMN04910312	GSM2135874	6911	Cape Verde	Africa	Leaf
Aitba-1	SAMN04910372	GSM2136127	9606	Morocco	Africa	Leaf
Aitba-2	SAMN04910804	GSM2136388	9939	Morocco	Africa	Leaf
Toufl-1	SAMN04910805	GSM2136389	9940	Morocco	Africa	Leaf
Tnz-1	SAMN04910931	GSM2135735	10024	Tanzania, United Republic of	Africa	Leaf
Kz-13	SAMN04910306	GSM2135868	6830	Kazakhstan	Central Asia	Leaf
Kar-1	SAMN04910555	GSM2135950	763	Kyrgyzstan	Central Asia	Leaf
Zal-1	SAMN04910556	GSM2135951	768	Kyrgyzstan	Central Asia	Leaf
Sij-2	SAMN04910640	GSM2135719	10009	Uzbekistan	Central Asia	Leaf
Sij-4	SAMN04910641	GSM2135720	10010	Uzbekistan	Central Asia	Leaf
KZ10	SAMN04910649	GSM2135729	10019	Kazakhstan	Central Asia	Leaf
Sij-1	SAMN04910660	GSM2135718	10008	Uzbekistan	Central Asia	Leaf
Sij 1/96	SAMN04910864	GSM2136235	9745	Uzbekistan	Central Asia	Leaf
UduI 1-11	SAMN04910297	GSM2135859	6296	Czech Republic	Central Europe	Leaf
UduI 3-36	SAMN04910299	GSM2135861	6390	Czech Republic	Central Europe	Leaf
ZdrI 2-9	SAMN04910301	GSM2135863	6434	Czech Republic	Central Europe	Leaf
ZdrI 2-21	SAMN04910302	GSM2135864	6445	Czech Republic	Central Europe	Leaf
ANH-1	SAMN04910303	GSM2135865	6680	Germany	Central Europe	Leaf
Mrk-0	SAMN04910319	GSM2135878	6937	Germany	Central Europe	Leaf
Pu2-8	SAMN04910320	GSM2135882	6957	Czech Republic	Central Europe	Leaf
HKT2.4	SAMN04910334	GSM2136436	9995	Germany	Central Europe	Leaf
Nie1-2	SAMN04910335	GSM2136437	9996	Germany	Central Europe	Leaf
Rue3.1-31	SAMN04910336	GSM2136438	9997	Germany	Central Europe	Leaf
Star-8	SAMN04910337	GSM2136439	9998	Germany	Central Europe	Leaf
TueSB30-3	SAMN04910338	GSM2136440	9999		Central Europe	Leaf
Uod-7	SAMN04910464	GSM2135889	6976	Austria	Central Europe	Leaf
Wei-0	SAMN04910465	GSM2135890	6979	Switzerland	Central Europe	Leaf
Bd-0	SAMN04910468	GSM2135893	7013	Germany	Central Europe	Leaf
Bch-1	SAMN04910469	GSM2135894	7028	Germany	Central Europe	Leaf
Da-0	SAMN04910473	GSM2135898	7094	Germany	Central Europe	Leaf
Do-0	SAMN04910474	GSM2135899	7102	Germany	Central Europe	Leaf
Dra-0	SAMN04910475	GSM2135900	7103	Czech Republic	Central Europe	Leaf
Dr-0	SAMN04910476	GSM2135901	7106	Germany	Central Europe	Leaf
En-2	SAMN04910479	GSM2135904	7119	Germany	Central Europe	Leaf
Gd-1	SAMN04910480	GSM2135905	7161	Germany	Central Europe	Leaf
Hn-0	SAMN04910482	GSM2135907	7165	Germany	Central Europe	Leaf
Hh-0	SAMN04910484	GSM2135909	7169	Germany	Central Europe	Leaf
Kb-0	SAMN04910486	GSM2135911	7202	Germany	Central Europe	Leaf
Li-7	SAMN04910488	GSM2135913	7231	Germany	Central Europe	Leaf
Mnz-0	SAMN04910489	GSM2135914	7244	Germany	Central Europe	Leaf
Rak-2	SAMN04910526	GSM2135981	8365	Czech Republic	Central Europe	Leaf
Rd-0	SAMN04910527	GSM2135982	8366		Central Europe	Leaf
Sap-0	SAMN04910528	GSM2135983	8378	Czech Republic	Central Europe	Leaf
Uod-2	SAMN04910532	GSM2135987	8428	Austria	Central Europe	Leaf
Lisse	SAMN04910533	GSM2135988	8430		Central Europe	Leaf
H55	SAMN04910550	GSM2135945	7461	Czech Republic	Central Europe	Leaf
Lp2-6	SAMN04910554	GSM2135949	7521	Czech Republic	Central Europe	Leaf
Hod	SAMN04910565	GSM2135960	8235	Czech Republic	Central Europe	Leaf
HSm	SAMN04910566	GSM2135961	8236	Czech Republic	Central Europe	Leaf
Koln	SAMN04910568	GSM2135963	8239	Germany	Central Europe	Leaf
DraII-1	SAMN04910576	GSM2135971	8284	Czech Republic	Central Europe	Leaf
En-1	SAMN04910577	GSM2135972	8290	Germany	Central Europe	Leaf
Ge-0	SAMN04910578	GSM2135973	8297	Switzerland	Central Europe	Leaf
Lip-0	SAMN04910579	GSM2135974	8325		Central Europe	Leaf
Mv-0	SAMN04910580	GSM2135915	7248		Central Europe	Leaf
Me-0	SAMN04910581	GSM2135916	7250	Germany	Central Europe	Leaf
Or-0	SAMN04910584	GSM2135919	7282	Germany	Central Europe	Leaf
Po-0	SAMN04910587	GSM2135922	7308	Germany	Central Europe	Leaf
Ste-0	SAMN04910594	GSM2135929	7346	Germany	Central Europe	Leaf
Tscha-1	SAMN04910599	GSM2135934	7372	Austria	Central Europe	Leaf
Wc-1	SAMN04910602	GSM2135939	7404	Germany	Central Europe	Leaf
Zu-1	SAMN04910604	GSM2135941	7418	Switzerland	Central Europe	Leaf
Jl-3	SAMN04910605	GSM2135942	7424	Czech Republic	Central Europe	Leaf
Bor-1	SAMN04910622	GSM2135807	5837	Czech Republic	Central Europe	Leaf
DraII-6	SAMN04910624	GSM2135809	5874	Czech Republic	Central Europe	Leaf
DraIV 1-8	SAMN04910625	GSM2135810	5890	Czech Republic	Central Europe	Leaf
DraIV 1-11	SAMN04910626	GSM2135811	5893	Czech Republic	Central Europe	Leaf
DraIV 2-9	SAMN04910627	GSM2135812	5907	Czech Republic	Central Europe	Leaf
DraIV 3-7	SAMN04910628	GSM2135813	5921	Czech Republic	Central Europe	Leaf
DraIV 5-12	SAMN04910629	GSM2135814	5950	Czech Republic	Central Europe	Leaf
DraIV 6-13	SAMN04910630	GSM2135815	5984	Czech Republic	Central Europe	Leaf
DraIV 6-22	SAMN04910634	GSM2135816	5993	Czech Republic	Central Europe	Leaf
Duk	SAMN04910635	GSM2135817	6008	Czech Republic	Central Europe	Leaf
Jl-2	SAMN04910651	GSM2135731	10020	Czech Republic	Central Europe	Leaf
Hl-0	SAMN04910652	GSM2135732	10021	Germany	Central Europe	Leaf
Uk-3	SAMN04910653	GSM2135733	10022	Germany	Central Europe	Leaf
Tuescha-9	SAMN04910655	GSM2135714	10000	Germany	Central Europe	Leaf
TueV-13	SAMN04910656	GSM2135715	10001	Germany	Central Europe	Leaf
TueWal-2	SAMN04910657	GSM2135716	10002	Germany	Central Europe	Leaf
Doubravnik7	SAMN04910661	GSM2135765	410	Czech Republic	Central Europe	Leaf
Draha2	SAMN04910662	GSM2135766	424	Czech Republic	Central Europe	Leaf
Borky1	SAMN04910663	GSM2135767	428	Czech Republic	Central Europe	Leaf
Ru4-16	SAMN04910722	GSM2136246	9768	Germany	Central Europe	Leaf
HE-1	SAMN04910723	GSM2136247	9769	Germany	Central Europe	Leaf
KBG2-13	SAMN04910724	GSM2136248	9770	Germany	Central Europe	Leaf
Pfn-N2.2-6	SAMN04910725	GSM2136249	9771	Germany	Central Europe	Leaf
Hof-1	SAMN04910726	GSM2136250	9772	Germany	Central Europe	Leaf
Alt-1	SAMN04910727	GSM2136251	9774	Germany	Central Europe	Leaf
Berg-1	SAMN04910728	GSM2136252	9775	Germany	Central Europe	Leaf
Fell3-7	SAMN04910729	GSM2136253	9776	Germany	Central Europe	Leaf
Gn-1	SAMN04910730	GSM2136254	9777	Germany	Central Europe	Leaf
Bach-7	SAMN04910731	GSM2136255	9778	Germany	Central Europe	Leaf
Bai-10	SAMN04910732	GSM2136256	9779	Germany	Central Europe	Leaf
Fell2-4	SAMN04910733	GSM2136257	9780	Germany	Central Europe	Leaf
Kus2-2	SAMN04910734	GSM2136258	9781	Germany	Central Europe	Leaf
Lu3-30	SAMN04910735	GSM2136259	9782	Germany	Central Europe	Leaf
Tu-PK-7	SAMN04910736	GSM2136260	9783	Germany	Central Europe	Leaf
Erg2-6	SAMN04910737	GSM2136261	9784	Germany	Central Europe	Leaf
Ha-HBT1-2	SAMN04910738	GSM2136262	9785	Germany	Central Europe	Leaf
Ha-P-13	SAMN04910739	GSM2136263	9786	Germany	Central Europe	Leaf
KBG1-14	SAMN04910740	GSM2136264	9788	Germany	Central Europe	Leaf
Obh-13	SAMN04910741	GSM2136265	9789	Germany	Central Europe	Leaf
Gn2-3	SAMN04910742	GSM2136266	9790	Germany	Central Europe	Leaf
Haes-1	SAMN04910743	GSM2136267	9791	Germany	Central Europe	Leaf
Lu4-2	SAMN04910744	GSM2136268	9792	Germany	Central Europe	Leaf
Ru-N2	SAMN04910745	GSM2136269	9793	Germany	Central Europe	Leaf
Tu-B1-2	SAMN04910746	GSM2136270	9794	Germany	Central Europe	Leaf
Wank-2	SAMN04910747	GSM2136271	9795	Germany	Central Europe	Leaf
Bach2-1	SAMN04910748	GSM2136272	9796	Germany	Central Europe	Leaf
Ha-HBT2-10	SAMN04910749	GSM2136273	9797	Germany	Central Europe	Leaf
Ha-P2-1	SAMN04910750	GSM2136274	9798	Germany	Central Europe	Leaf
Stiav-1	SAMN04910845	GSM2136219	9728	Slovakia	Central Europe	Leaf
Stiav-2	SAMN04910846	GSM2136220	9729	Slovakia	Central Europe	Leaf
Bela-1	SAMN04910847	GSM2136221	9730	Slovakia	Central Europe	Leaf
Stiav-3	SAMN04910848	GSM2136222	9731	Slovakia	Central Europe	Leaf
Halca-1	SAMN04910849	GSM2136223	9732	Slovakia	Central Europe	Leaf
Bela-2	SAMN04910850	GSM2136224	9733	Slovakia	Central Europe	Leaf
Bela-3	SAMN04910851	GSM2136225	9734	Slovakia	Central Europe	Leaf
Bela-4	SAMN04910852	GSM2136226	9735	Slovakia	Central Europe	Leaf
Zdarec3	SAMN04910960	GSM2135764	403	Czech Republic	Central Europe	Leaf
Hart-2	SAMN04910961	GSM2136275	9799	Germany	Central Europe	Leaf
Ha-S-B	SAMN04910962	GSM2136276	9800	Germany	Central Europe	Leaf
Ha-SP-2	SAMN04910963	GSM2136277	9801	Germany	Central Europe	Leaf
Kus3-1	SAMN04910964	GSM2136278	9802	Germany	Central Europe	Leaf
Muh-2	SAMN04910965	GSM2136279	9803	Germany	Central Europe	Leaf
Obe1-15	SAMN04910966	GSM2136280	9804	Germany	Central Europe	Leaf
Pfn-10	SAMN04910967	GSM2136281	9805	Germany	Central Europe	Leaf
Ru-2	SAMN04910968	GSM2136282	9806	Germany	Central Europe	Leaf
Schl-7	SAMN04910969	GSM2136283	9807	Germany	Central Europe	Leaf
Tu-B2-3	SAMN04910970	GSM2136284	9808	Germany	Central Europe	Leaf
Tu-KB-6	SAMN04910971	GSM2136285	9809	Germany	Central Europe	Leaf
Tu-NK-12	SAMN04910972	GSM2136286	9811	Germany	Central Europe	Leaf
Tu-W1	SAMN04910973	GSM2136287	9812	Germany	Central Europe	Leaf
BI-4	SAMN04910974	GSM2136288	9813	Germany	Central Europe	Leaf
Fell1-10	SAMN04910975	GSM2136289	9814	Germany	Central Europe	Leaf
Ha-HBT3-11	SAMN04910976	GSM2136290	9815	Germany	Central Europe	Leaf
Tu-WH	SAMN04910977	GSM2136291	9816	Germany	Central Europe	Leaf
Sapporo-0	SAMN04910593	GSM2135928	7330	Japan	Eastern Asia	Leaf
Tsu-0	SAMN04910600	GSM2135935	7373	Japan	Eastern Asia	Leaf
Panik-1	SAMN04910373	GSM2136128	9607	Russian Federation	Eastern Europe	Leaf
Karag-2	SAMN04910374	GSM2136129	9608	Russian Federation	Eastern Europe	Leaf
Adam-1	SAMN04910375	GSM2136130	9609	Russian Federation	Eastern Europe	Leaf
Lesno-4	SAMN04910376	GSM2136131	9610	Russian Federation	Eastern Europe	Leaf
Lesno-1	SAMN04910377	GSM2136132	9611	Russian Federation	Eastern Europe	Leaf
Lesno-2	SAMN04910378	GSM2136133	9612	Russian Federation	Eastern Europe	Leaf
Balan-1	SAMN04910379	GSM2136134	9613	Russian Federation	Eastern Europe	Leaf
Parti-1	SAMN04910380	GSM2136135	9615	Russian Federation	Eastern Europe	Leaf
Krazo-1	SAMN04910381	GSM2136136	9616	Russian Federation	Eastern Europe	Leaf
Karag-1	SAMN04910382	GSM2136137	9617	Russian Federation	Eastern Europe	Leaf
Basta-1	SAMN04910383	GSM2136138	9619	Russian Federation	Eastern Europe	Leaf
Basta-2	SAMN04910384	GSM2136139	9620	Russian Federation	Eastern Europe	Leaf
Basta-3	SAMN04910385	GSM2136140	9621	Russian Federation	Eastern Europe	Leaf
Bijisk-4	SAMN04910386	GSM2136141	9622	Russian Federation	Eastern Europe	Leaf
Chaba-1	SAMN04910387	GSM2136142	9623	Russian Federation	Eastern Europe	Leaf
Chaba-2	SAMN04910388	GSM2136143	9624	Russian Federation	Eastern Europe	Leaf
Kolyv-3	SAMN04910389	GSM2136144	9626	Russian Federation	Eastern Europe	Leaf
Kolyv-5	SAMN04910390	GSM2136145	9627	Russian Federation	Eastern Europe	Leaf
Kolyv-6	SAMN04910391	GSM2136146	9628	Russian Federation	Eastern Europe	Leaf
K-oze-1	SAMN04910392	GSM2136147	9629	Russian Federation	Eastern Europe	Leaf
Lebja-1	SAMN04910393	GSM2136149	9631	Russian Federation	Eastern Europe	Leaf
Lebja-2	SAMN04910394	GSM2136150	9632	Russian Federation	Eastern Europe	Leaf
Lebja-4	SAMN04910395	GSM2136151	9633	Russian Federation	Eastern Europe	Leaf
Masl-1	SAMN04910396	GSM2136152	9634	Russian Federation	Eastern Europe	Leaf
Noveg-1	SAMN04910397	GSM2136153	9636	Russian Federation	Eastern Europe	Leaf
K-oze-3	SAMN04910398	GSM2136148	9630	Russian Federation	Eastern Europe	Leaf
Noveg-2	SAMN04910399	GSM2136154	9637	Russian Federation	Eastern Europe	Leaf
Kn-0	SAMN04910485	GSM2135910	7186	Lithuania	Eastern Europe	Leaf
Wil-1	SAMN04910530	GSM2135985	8419	Lithuania	Eastern Europe	Leaf
Petergof	SAMN04910586	GSM2135921	7296	Russian Federation	Eastern Europe	Leaf
Rsch-4	SAMN04910590	GSM2135925	7322	Russian Federation	Eastern Europe	Leaf
Wil-2	SAMN04910603	GSM2135940	7413	Lithuania	Eastern Europe	Leaf
Ws-0	SAMN04910608	GSM2135938	7396	Russian Federation	Eastern Europe	Leaf
Kastel-1	SAMN04910658	GSM2135717	10006	Ukraine	Eastern Europe	Leaf
Kly-1	SAMN04910696	GSM2136400	9951	Russian Federation	Eastern Europe	Leaf
Kly-4	SAMN04910697	GSM2136401	9952		Eastern Europe	Leaf
Koz-2	SAMN04910698	GSM2136402	9953	Russian Federation	Eastern Europe	Leaf
Leb-3	SAMN04910699	GSM2136403	9954	Russian Federation	Eastern Europe	Leaf
Borsk-2	SAMN04910700	GSM2136404	9957	Russian Federation	Eastern Europe	Leaf
Shigu-1	SAMN04910701	GSM2136405	9958	Russian Federation	Eastern Europe	Leaf
Shigu-2	SAMN04910702	GSM2136406	9959	Russian Federation	Eastern Europe	Leaf
Kidr-1	SAMN04910703	GSM2136407	9960	Russian Federation	Eastern Europe	Leaf
Krazo-2	SAMN04910704	GSM2136408	9961	Russian Federation	Eastern Europe	Leaf
Noveg-3	SAMN04910811	GSM2136155	9638	Russian Federation	Eastern Europe	Leaf
Panke-1	SAMN04910812	GSM2136156	9639	Russian Federation	Eastern Europe	Leaf
Rakit-1	SAMN04910813	GSM2136157	9640	Russian Federation	Eastern Europe	Leaf
Rakit-3	SAMN04910814	GSM2136158	9642	Russian Federation	Eastern Europe	Leaf
LI-OF-065	SAMN04910298	GSM2135860	630	United States	Northern America	Leaf
Bg-2	SAMN04910304	GSM2135866	6709	United States	Northern America	Leaf
CSHL-5	SAMN04910305	GSM2135867	6744	United States	Northern America	Leaf
LI-EF-018	SAMN04910307	GSM2135869	687		Northern America	Leaf
Col-0	SAMN04910339	GSM2136441	6909	United States	Northern America	Leaf
Buckhorn Pass	SAMN04910470	GSM2135895	7033	United States	Northern America	Leaf
LIN S-5	SAMN04910505	GSM2136020	915	United States	Northern America	Leaf
CHA-41	SAMN04910509	GSM2136024	932	United States	Northern America	Leaf
LP3413.41	SAMN04910534	GSM2135989	8472	United States	Northern America	Leaf
328ME059	SAMN04910535	GSM2135990	8584	United States	Northern America	Leaf
MIC-31	SAMN04910536	GSM2135991	870	United States	Northern America	Leaf
WAR	SAMN04910551	GSM2135946	7477	United States	Northern America	Leaf
RRS-10	SAMN04910552	GSM2135947	7515	United States	Northern America	Leaf
KNO1.37	SAMN04910557	GSM2135952	7717	United States	Northern America	Leaf
PNA3.10	SAMN04910558	GSM2135953	7917	United States	Northern America	Leaf
KYC-33	SAMN04910559	GSM2135954	801	United States	Northern America	Leaf
PT2.21	SAMN04910560	GSM2135955	8077	United States	Northern America	Leaf
RMX3.22	SAMN04910561	GSM2135956	8132	United States	Northern America	Leaf
Dem-4	SAMN04910563	GSM2135958	8233	United States	Northern America	Leaf
NC-6	SAMN04910570	GSM2135965	8246	United States	Northern America	Leaf
LI-SET-019	SAMN04910583	GSM2135918	728	United States	Northern America	Leaf
Tac-0	SAMN04910595	GSM2135930	7350	United States	Northern America	Leaf
Tul-0	SAMN04910601	GSM2135936	7377	United States	Northern America	Leaf
UKSW06-179	SAMN04910664	GSM2135768	4779		Northern America	Leaf
BRR60	SAMN04910672	GSM2135776	506	United States	Northern America	Leaf
Bg-5	SAMN04910932	GSM2135736	10026	United States	Northern America	Leaf
KBS-Mac-74	SAMN04910941	GSM2135745	1741	United States	Northern America	Leaf
Mdn-1	SAMN04910942	GSM2135746	1829	United States	Northern America	Leaf
MNF-Pot-75	SAMN04910943	GSM2135747	1872	United States	Northern America	Leaf
MNF-Riv-21	SAMN04910944	GSM2135748	1890	United States	Northern America	Leaf
MNF-Che-2	SAMN04910945	GSM2135749	1925	United States	Northern America	Leaf
MNF-Jac-12	SAMN04910946	GSM2135750	1954	United States	Northern America	Leaf
MNF-Pin-39	SAMN04910947	GSM2135751	2016	United States	Northern America	Leaf
MNF-Pin-40	SAMN04910948	GSM2135752	2017	United States	Northern America	Leaf
Map-8	SAMN04910949	GSM2135753	2031		Northern America	Leaf
Ste-40	SAMN04910950	GSM2135759	2317	United States	Northern America	Leaf
Paw-26	SAMN04910951	GSM2135754	2171	United States	Northern America	Leaf
Pent-23	SAMN04910952	GSM2135755	2202	United States	Northern America	Leaf
Pent-46	SAMN04910953	GSM2135756	2212		Northern America	Leaf
SLSP-31	SAMN04910954	GSM2135757	2276	United States	Northern America	Leaf
SLSP-35	SAMN04910955	GSM2135758	2278	United States	Northern America	Leaf
Yng-4	SAMN04910956	GSM2135760	2370	United States	Northern America	Leaf
TOM 07	SAMN04910293	GSM2135855	6241	Sweden	Northern Europe	Leaf
TV-7	SAMN04910294	GSM2135856	6255	Sweden	Northern Europe	Leaf
TV-22	SAMN04910295	GSM2135857	6268	Sweden	Northern Europe	Leaf
TV-38	SAMN04910296	GSM2135858	6284	Sweden	Northern Europe	Leaf
ZdrI 1-23	SAMN04910300	GSM2135862	6424		Northern Europe	Leaf
Bil-5	SAMN04910308	GSM2135870	6900	Sweden	Northern Europe	Leaf
Fab-2	SAMN04910316	GSM2135875	6917	Sweden	Northern Europe	Leaf
Nyl-2	SAMN04910340	GSM2135825	6064	Sweden	Northern Europe	Leaf
T1070	SAMN04910342	GSM2135827	6097		Northern Europe	Leaf
T1090	SAMN04910343	GSM2135828	6099	Sweden	Northern Europe	Leaf
T460	SAMN04910344	GSM2135829	6106	Sweden	Northern Europe	Leaf
T470	SAMN04910345	GSM2135830	6107	Sweden	Northern Europe	Leaf
T480	SAMN04910346	GSM2135831	6108	Sweden	Northern Europe	Leaf
T530	SAMN04910347	GSM2135832	6111	Sweden	Northern Europe	Leaf
T800	SAMN04910348	GSM2135833	6133	Sweden	Northern Europe	Leaf
T850	SAMN04910349	GSM2135834	6137	Sweden	Northern Europe	Leaf
T860	SAMN04910350	GSM2135835	6138	Sweden	Northern Europe	Leaf
T880	SAMN04910351	GSM2135836	6140	Sweden	Northern Europe	Leaf
T930	SAMN04910352	GSM2135837	6145	Sweden	Northern Europe	Leaf
T960	SAMN04910353	GSM2135838	6148	Sweden	Northern Europe	Leaf
TAA 04	SAMN04910354	GSM2135839	6154	Sweden	Northern Europe	Leaf
TAA 14	SAMN04910355	GSM2135840	6163	Sweden	Northern Europe	Leaf
TAA 17	SAMN04910356	GSM2135841	6166	Sweden	Northern Europe	Leaf
TAD 01	SAMN04910357	GSM2135842	6169	Sweden	Northern Europe	Leaf
TAD 03	SAMN04910358	GSM2135843	6171	Sweden	Northern Europe	Leaf
TAD 06	SAMN04910359	GSM2135844	6174	Sweden	Northern Europe	Leaf
TAL 03	SAMN04910360	GSM2135845	6177	Sweden	Northern Europe	Leaf
TDr-8	SAMN04910361	GSM2135846	6194		Northern Europe	Leaf
TDr-9	SAMN04910362	GSM2135847	6195	Sweden	Northern Europe	Leaf
TDr-13	SAMN04910363	GSM2135848	6198	Sweden	Northern Europe	Leaf
TDr-16	SAMN04910364	GSM2135849	6201	Sweden	Northern Europe	Leaf
TDr-18	SAMN04910365	GSM2135850	6203	Sweden	Northern Europe	Leaf
TFA 07	SAMN04910366	GSM2135851	6217	Sweden	Northern Europe	Leaf
TFA 08	SAMN04910367	GSM2135852	6218	Sweden	Northern Europe	Leaf
TGR 01	SAMN04910368	GSM2135853	6220	Sweden	Northern Europe	Leaf
TOM 06	SAMN04910369	GSM2135854	6240		Northern Europe	Leaf
Ull2-3	SAMN04910462	GSM2135887	6973	Sweden	Northern Europe	Leaf
Ull2-5	SAMN04910463	GSM2135888	6974	Sweden	Northern Europe	Leaf
Hau-0	SAMN04910481	GSM2135906	7164	Denmark	Northern Europe	Leaf
HolA-1 2	SAMN04910510	GSM2136029	9405	Sweden	Northern Europe	Leaf
Kal 1	SAMN04910511	GSM2136030	9408	Sweden	Northern Europe	Leaf
Kia 1	SAMN04910512	GSM2136031	9409	Sweden	Northern Europe	Leaf
Adal 1	SAMN04910513	GSM2136025	9321	Sweden	Northern Europe	Leaf
Gron 12	SAMN04910514	GSM2136026	9386	Sweden	Northern Europe	Leaf
Gron 14	SAMN04910515	GSM2136027	9388	Sweden	Northern Europe	Leaf
HolA-1 1	SAMN04910516	GSM2136028	9404	Sweden	Northern Europe	Leaf
Lan 1	SAMN04910517	GSM2136032	9421	Sweden	Northern Europe	Leaf
Nyl 13	SAMN04910518	GSM2136033	9433	Sweden	Northern Europe	Leaf
Spro 2	SAMN04910519	GSM2136034	9451	Sweden	Northern Europe	Leaf
Lu-1	SAMN04910520	GSM2135975	8334	Sweden	Northern Europe	Leaf
Ost-0	SAMN04910523	GSM2135978	8351	Sweden	Northern Europe	Leaf
Var2-6	SAMN04910553	GSM2135948	7517		Northern Europe	Leaf
Bro1-6	SAMN04910562	GSM2135957	8231	Sweden	Northern Europe	Leaf
Gul1-2	SAMN04910564	GSM2135959	8234	Sweden	Northern Europe	Leaf
San-2	SAMN04910571	GSM2135966	8247	Sweden	Northern Europe	Leaf
Ba5-1	SAMN04910572	GSM2135967	8259	Sweden	Northern Europe	Leaf
Boo2-1	SAMN04910574	GSM2135969	8266	Sweden	Northern Europe	Leaf
Oy-0	SAMN04910585	GSM2135920	7288	Norway	Northern Europe	Leaf
Ting-1	SAMN04910597	GSM2135932	7354	Sweden	Northern Europe	Leaf
Ko-2	SAMN04910606	GSM2135943	7427	Denmark	Northern Europe	Leaf
Ber	SAMN04910609	GSM2135944	7458	Denmark	Northern Europe	Leaf
Dra-3	SAMN04910623	GSM2135808	5860	Sweden	Northern Europe	Leaf
Eds-9	SAMN04910631	GSM2135819	6017	Sweden	Northern Europe	Leaf
Fja1-5	SAMN04910632	GSM2135820	6020	Sweden	Northern Europe	Leaf
Fly2-2	SAMN04910633	GSM2135821	6024	Sweden	Northern Europe	Leaf
Eden-1	SAMN04910636	GSM2135818	6009	Sweden	Northern Europe	Leaf
Gro-3	SAMN04910637	GSM2135822	6025	Sweden	Northern Europe	Leaf
Hov3-5	SAMN04910638	GSM2135823	6038	Sweden	Northern Europe	Leaf
Lis-3	SAMN04910639	GSM2135824	6041	Sweden	Northern Europe	Leaf
Ale-Stenar-64-24	SAMN04910650	GSM2135730	1002	Sweden	Northern Europe	Leaf
Ale-Stenar-56-14	SAMN04910716	GSM2136417	997	Sweden	Northern Europe	Leaf
Brosarp-34-145	SAMN04910933	GSM2135737	1066	Sweden	Northern Europe	Leaf
Aledal-6-49	SAMN04910935	GSM2135739	1158	Sweden	Northern Europe	Leaf
Angso-74-430	SAMN04910936	GSM2135740	1317		Northern Europe	Leaf
Rod-17-319	SAMN04910938	GSM2135742	1435	Sweden	Northern Europe	Leaf
Haz-10	SAMN04910940	GSM2135744	1684		Northern Europe	Leaf
Nz-1	SAMN04910582	GSM2135917	7263	New Zealand	Pacific Island	Leaf
Kas-2	SAMN04910531	GSM2135986	8424	India	Southern Asia	Leaf
IP-Cum-1	SAMN04910263	GSM2136065	9537	Spain	Southern Europe	Leaf
IP-Cur-4	SAMN04910264	GSM2136066	9538	Spain	Southern Europe	Leaf
IP-Elb-0	SAMN04910265	GSM2136067	9540	Spain	Southern Europe	Leaf
IP-Fue-2	SAMN04910266	GSM2136068	9541	Spain	Southern Europe	Leaf
IP-Fun-0	SAMN04910267	GSM2136069	9542	Spain	Southern Europe	Leaf
IP-Gra-0	SAMN04910268	GSM2136070	9543	Spain	Southern Europe	Leaf
IP-Gua-1	SAMN04910269	GSM2136071	9544	Spain	Southern Europe	Leaf
IP-Her-12	SAMN04910270	GSM2136072	9545	Spain	Southern Europe	Leaf
IP-Hom-4	SAMN04910271	GSM2136073	9546	Spain	Southern Europe	Leaf
IP-Hor-0	SAMN04910272	GSM2136074	9547	Spain	Southern Europe	Leaf
IP-Hoy-0	SAMN04910273	GSM2136075	9548	Spain	Southern Europe	Leaf
IP-Hum-2	SAMN04910274	GSM2136076	9549	Spain	Southern Europe	Leaf
IP-Iso-4	SAMN04910275	GSM2136077	9550	Spain	Southern Europe	Leaf
IP-Jim-1	SAMN04910276	GSM2136078	9551	Spain	Southern Europe	Leaf
IP-Lab-7	SAMN04910277	GSM2136079	9552	Spain	Southern Europe	Leaf
IP-Ldd-0	SAMN04910278	GSM2136080	9553	Spain	Southern Europe	Leaf
IP-Lso-0	SAMN04910279	GSM2136081	9554	Spain	Southern Europe	Leaf
IP-Men-2	SAMN04910280	GSM2136082	9556	Spain	Southern Europe	Leaf
IP-Moa-0	SAMN04910281	GSM2136083	9557	Spain	Southern Europe	Leaf
IP-Nav-0	SAMN04910282	GSM2136089	9563	Spain	Southern Europe	Leaf
IP-Moc-11	SAMN04910283	GSM2136084	9558	Spain	Southern Europe	Leaf
IP-Mon-5	SAMN04910284	GSM2136085	9559	Spain	Southern Europe	Leaf
IP-Mot-0	SAMN04910285	GSM2136086	9560	Spain	Southern Europe	Leaf
IP-Mun-0	SAMN04910286	GSM2136087	9561	Spain	Southern Europe	Leaf
IP-Mur-0	SAMN04910287	GSM2136088	9562	Spain	Southern Europe	Leaf
IP-Nog-17	SAMN04910288	GSM2136090	9564	Spain	Southern Europe	Leaf
IP-Orb-10	SAMN04910289	GSM2136091	9565	Spain	Southern Europe	Leaf
IP-Oso-0	SAMN04910290	GSM2136092	9566	Spain	Southern Europe	Leaf
IP-Pal-0	SAMN04910291	GSM2136093	9567	Spain	Southern Europe	Leaf
IP-Pan-0	SAMN04910292	GSM2136094	9568	Spain	Southern Europe	Leaf
C24	SAMN04910309	GSM2135871	6906	Portugal	Southern Europe	Leaf
LL-0	SAMN04910318	GSM2135877	6933	Spain	Southern Europe	Leaf
Apost-1	SAMN04910323	GSM2136425	9982	Italy	Southern Europe	Leaf
Ciste-1	SAMN04910324	GSM2136426	9983	Italy	Southern Europe	Leaf
Ciste-2	SAMN04910325	GSM2136427	9984		Southern Europe	Leaf
Slavi-1	SAMN04910326	GSM2136428	9985	Bulgaria	Southern Europe	Leaf
Lecho-1	SAMN04910327	GSM2136429	9987	Bulgaria	Southern Europe	Leaf
IP-Voz-0	SAMN04910370	GSM2136125	9601	Spain	Southern Europe	Leaf
IP-Vpa-1	SAMN04910371	GSM2136126	9602		Southern Europe	Leaf
IP-Pds-1	SAMN04910400	GSM2136095	9569	Spain	Southern Europe	Leaf
IP-Pob-0	SAMN04910401	GSM2136096	9570	Spain	Southern Europe	Leaf
IP-Pue-0	SAMN04910402	GSM2136097	9572	Spain	Southern Europe	Leaf
IP-Rds-0	SAMN04910403	GSM2136098	9573	Spain	Southern Europe	Leaf
IP-Rel-0	SAMN04910404	GSM2136099	9574	Spain	Southern Europe	Leaf
IP-Ren-6	SAMN04910405	GSM2136100	9575	Spain	Southern Europe	Leaf
IP-Rev-0	SAMN04910406	GSM2136101	9576	Spain	Southern Europe	Leaf
IP-Ria-0	SAMN04910407	GSM2136102	9577	Spain	Southern Europe	Leaf
IP-Sac-0	SAMN04910408	GSM2136103	9578	Spain	Southern Europe	Leaf
IP-San-10	SAMN04910409	GSM2136104	9579	Spain	Southern Europe	Leaf
IP-Scm-0	SAMN04910410	GSM2136105	9580	Spain	Southern Europe	Leaf
IP-Sdv-3	SAMN04910411	GSM2136106	9581	Spain	Southern Europe	Leaf
IP-Ses-0	SAMN04910412	GSM2136107	9582	Spain	Southern Europe	Leaf
IP-Sne-0	SAMN04910413	GSM2136108	9583	Spain	Southern Europe	Leaf
IP-Stp-0	SAMN04910414	GSM2136109	9584	Spain	Southern Europe	Leaf
IP-Svi-0	SAMN04910415	GSM2136110	9585	Spain	Southern Europe	Leaf
IP-Tam-0	SAMN04910416	GSM2136111	9586	Spain	Southern Europe	Leaf
IP-Tdc-0	SAMN04910417	GSM2136112	9587	Spain	Southern Europe	Leaf
IP-Tol-7	SAMN04910418	GSM2136113	9588	Spain	Southern Europe	Leaf
IP-Trs-0	SAMN04910419	GSM2136114	9590	Spain	Southern Europe	Leaf
IP-Vad-0	SAMN04910420	GSM2136115	9591	Spain	Southern Europe	Leaf
IP-Vae-2	SAMN04910421	GSM2136116	9592	Spain	Southern Europe	Leaf
IP-Vaz-0	SAMN04910422	GSM2136117	9593	Spain	Southern Europe	Leaf
IP-Vdm-0	SAMN04910423	GSM2136118	9594	Spain	Southern Europe	Leaf
IP-Vdt-0	SAMN04910424	GSM2136119	9595	Spain	Southern Europe	Leaf
IP-Ver-5	SAMN04910425	GSM2136120	9596	Spain	Southern Europe	Leaf
IP-Vig-1	SAMN04910426	GSM2136121	9597	Spain	Southern Europe	Leaf
IP-Vim-0	SAMN04910427	GSM2136122	9598	Spain	Southern Europe	Leaf
IP-Vin-0	SAMN04910428	GSM2136123	9599	Spain	Southern Europe	Leaf
IP-Vis-0	SAMN04910429	GSM2136124	9600	Spain	Southern Europe	Leaf
IP-Alo-0	SAMN04910431	GSM2136036	9506	Portugal	Southern Europe	Leaf
IP-Coa-0	SAMN04910432	GSM2136037	9507	Portugal	Southern Europe	Leaf
IP-Mos-1	SAMN04910433	GSM2136038	9508	Portugal	Southern Europe	Leaf
IP-Reg-0	SAMN04910434	GSM2136039	9509	Portugal	Southern Europe	Leaf
IP-Rei-0	SAMN04910435	GSM2136040	9510	Portugal	Southern Europe	Leaf
IP-Vav-0	SAMN04910436	GSM2136041	9511	Portugal	Southern Europe	Leaf
IP-Vid-1	SAMN04910437	GSM2136042	9512	Portugal	Southern Europe	Leaf
IP-Adc-5	SAMN04910438	GSM2136043	9513	Spain	Southern Europe	Leaf
IP-Adm-0	SAMN04910439	GSM2136044	9514	Spain	Southern Europe	Leaf
IP-Ala-0	SAMN04910440	GSM2136045	9515	Spain	Southern Europe	Leaf
IP-Ali-1	SAMN04910441	GSM2136046	9516	Spain	Southern Europe	Leaf
IP-All-0	SAMN04910442	GSM2136047	9517	Spain	Southern Europe	Leaf
IP-Alm-0	SAMN04910443	GSM2136048	9518	Spain	Southern Europe	Leaf
IP-Ang-0	SAMN04910444	GSM2136049	9519	Spain	Southern Europe	Leaf
IP-Ara-4	SAMN04910445	GSM2136050	9520	Spain	Southern Europe	Leaf
IP-Bar-1	SAMN04910446	GSM2136051	9521	Spain	Southern Europe	Leaf
IP-Bea-0	SAMN04910447	GSM2136052	9522	Spain	Southern Europe	Leaf
IP-Ben-0	SAMN04910448	GSM2136053	9523	Spain	Southern Europe	Leaf
IP-Ber-0	SAMN04910449	GSM2136054	9524	Spain	Southern Europe	Leaf
IP-Bis-0	SAMN04910450	GSM2136055	9525	Spain	Southern Europe	Leaf
IP-Cab-3	SAMN04910451	GSM2136056	9526	Spain	Southern Europe	Leaf
IP-Cad-0	SAMN04910452	GSM2136057	9527	Spain	Southern Europe	Leaf
IP-Cap-1	SAMN04910453	GSM2136058	9529	Spain	Southern Europe	Leaf
IP-Car-1	SAMN04910454	GSM2136059	9530	Spain	Southern Europe	Leaf
IP-Cdc-3	SAMN04910455	GSM2136060	9531	Spain	Southern Europe	Leaf
IP-Cdo-0	SAMN04910456	GSM2136061	9532	Spain	Southern Europe	Leaf
IP-Cem-0	SAMN04910457	GSM2136062	9533	Spain	Southern Europe	Leaf
IP-Cmo-3	SAMN04910458	GSM2136063	9534	Spain	Southern Europe	Leaf
IP-Coc-1	SAMN04910459	GSM2136064	9535	Spain	Southern Europe	Leaf
Ts-1	SAMN04910460	GSM2135885	6970	Spain	Southern Europe	Leaf
Ts-5	SAMN04910461	GSM2135886	6971	Spain	Southern Europe	Leaf
Ct-1	SAMN04910472	GSM2135897	7067	Italy	Southern Europe	Leaf
Mir-0	SAMN04910521	GSM2135976	8337	Italy	Southern Europe	Leaf
Pa-1	SAMN04910524	GSM2135979	8353	Italy	Southern Europe	Leaf
Pla-0	SAMN04910525	GSM2135980	8357	Spain	Southern Europe	Leaf
Bla-1	SAMN04910573	GSM2135968	8264	Spain	Southern Europe	Leaf
Sf-1	SAMN04910591	GSM2135926	7327	Spain	Southern Europe	Leaf
Sf-2	SAMN04910592	GSM2135927	7328	Spain	Southern Europe	Leaf
Tiv-1	SAMN04910598	GSM2135933	7355	Italy	Southern Europe	Leaf
Del-10	SAMN04910646	GSM2135726	10016	Serbia	Southern Europe	Leaf
Petro-1	SAMN04910647	GSM2135727	10017	Serbia	Southern Europe	Leaf
Dobra-1	SAMN04910648	GSM2135728	10018	Serbia	Southern Europe	Leaf
Mer-6	SAMN04910691	GSM2136395	9946	Spain	Southern Europe	Leaf
Ped-0	SAMN04910692	GSM2136396	9947	Spain	Southern Europe	Leaf
Pra-6	SAMN04910693	GSM2136397	9948	Spain	Southern Europe	Leaf
Qui-0	SAMN04910694	GSM2136398	9949	Spain	Southern Europe	Leaf
Vie-0	SAMN04910695	GSM2136399	9950	Spain	Southern Europe	Leaf
Galdo-1	SAMN04910705	GSM2136409	9962	Italy	Southern Europe	Leaf
Lago-1	SAMN04910706	GSM2136410	9963	Italy	Southern Europe	Leaf
Mammo-1	SAMN04910707	GSM2136411	9964	Italy	Southern Europe	Leaf
Mammo-2	SAMN04910708	GSM2136412	9965	Italy	Southern Europe	Leaf
Monte-1	SAMN04910709	GSM2136413	9966	Italy	Southern Europe	Leaf
Moran-1	SAMN04910710	GSM2136414	9967		Southern Europe	Leaf
Timpo-1	SAMN04910711	GSM2136415	9968	Italy	Southern Europe	Leaf
Valsi-1	SAMN04910712	GSM2136416	9969	Italy	Southern Europe	Leaf
Bozen-1.2	SAMN04910713	GSM2136419	9972	Italy	Southern Europe	Leaf
Mitterberg-1-181	SAMN04910714	GSM2136420	9973	Italy	Southern Europe	Leaf
Rovero-1	SAMN04910715	GSM2136421	9976	Italy	Southern Europe	Leaf
Altenb-2	SAMN04910717	GSM2136418	9970	Italy	Southern Europe	Leaf
Voeran-1	SAMN04910718	GSM2136422	9979	Italy	Southern Europe	Leaf
Angel-1	SAMN04910719	GSM2136423	9980	Italy	Southern Europe	Leaf
Angit-1	SAMN04910720	GSM2136424	9981	Italy	Southern Europe	Leaf
Etna-2	SAMN04910721	GSM2136245	9762	Italy	Southern Europe	Leaf
Castelfed-1-196	SAMN04910751	GSM2136185	9680		Southern Europe	Leaf
Castelfed-1-197	SAMN04910752	GSM2136186	9681		Southern Europe	Leaf
Castelfed-1-198	SAMN04910753	GSM2136187	9682		Southern Europe	Leaf
Castelfed-1-199	SAMN04910754	GSM2136188	9683		Southern Europe	Leaf
Castelfed-2-200	SAMN04910755	GSM2136189	9684	Italy	Southern Europe	Leaf
Castelfed-3-206	SAMN04910756	GSM2136190	9690	Italy	Southern Europe	Leaf
Castelfed-3-209	SAMN04910757	GSM2136191	9693	Italy	Southern Europe	Leaf
Castelfed-4-214	SAMN04910758	GSM2136192	9696	Italy	Southern Europe	Leaf
Dolen-1	SAMN04910759	GSM2136193	9697	Bulgaria	Southern Europe	Leaf
Goced-1	SAMN04910760	GSM2136194	9698	Bulgaria	Southern Europe	Leaf
Kolar-1	SAMN04910761	GSM2136195	9699	Bulgaria	Southern Europe	Leaf
Ivano-1	SAMN04910762	GSM2136196	9701	Bulgaria	Southern Europe	Leaf
Kolar-2	SAMN04910763	GSM2136197	9702	Bulgaria	Southern Europe	Leaf
Melni-1	SAMN04910764	GSM2136198	9703	Bulgaria	Southern Europe	Leaf
Melni-2	SAMN04910765	GSM2136199	9704	Bulgaria	Southern Europe	Leaf
Choto-1	SAMN04910766	GSM2136200	9705	Bulgaria	Southern Europe	Leaf
Dospa-1	SAMN04910767	GSM2136201	9706	Bulgaria	Southern Europe	Leaf
Podvi-1	SAMN04910768	GSM2136202	9707	Bulgaria	Southern Europe	Leaf
Kardz-1	SAMN04910769	GSM2136203	9708	Bulgaria	Southern Europe	Leaf
Zerev-1	SAMN04910770	GSM2136204	9709	Bulgaria	Southern Europe	Leaf
Zerev-1	SAMN04910771	GSM2136205	9710	Bulgaria	Southern Europe	Leaf
Dolna-1	SAMN04910772	GSM2136206	9711		Southern Europe	Leaf
Dolna-1	SAMN04910773	GSM2136207	9712		Southern Europe	Leaf
Stara-1	SAMN04910774	GSM2136208	9713	Bulgaria	Southern Europe	Leaf
Grivo-1	SAMN04910775	GSM2136209	9714	Bulgaria	Southern Europe	Leaf
Kardz-2	SAMN04910776	GSM2136210	9717	Bulgaria	Southern Europe	Leaf
Koren-1	SAMN04910777	GSM2136211	9719	Bulgaria	Southern Europe	Leaf
Malak-1	SAMN04910778	GSM2136212	9720	Bulgaria	Southern Europe	Leaf
Schip-1	SAMN04910779	GSM2136213	9721	Bulgaria	Southern Europe	Leaf
Groch-1	SAMN04910780	GSM2136214	9722	Bulgaria	Southern Europe	Leaf
Vas-0	SAMN04910781	GSM2136365	9904	Spain	Southern Europe	Leaf
Ven-0	SAMN04910782	GSM2136366	9905	Spain	Southern Europe	Leaf
Mah-6	SAMN04910783	GSM2136367	9906	Spain	Southern Europe	Leaf
Fei-0	SAMN04910806	GSM2136390	9941	Portugal	Southern Europe	Leaf
Agu-1	SAMN04910807	GSM2136391	9942	Spain	Southern Europe	Leaf
Cdm-0	SAMN04910808	GSM2136392	9943		Southern Europe	Leaf
Don-0	SAMN04910809	GSM2136393	9944	Spain	Southern Europe	Leaf
Leo-1	SAMN04910810	GSM2136394	9945	Spain	Southern Europe	Leaf
Zupan-1	SAMN04910815	GSM2136159	9644	Croatia	Southern Europe	Leaf
Gradi-1	SAMN04910816	GSM2136160	9645	Croatia	Southern Europe	Leaf
Basen-1	SAMN04910818	GSM2136162	9647	Italy	Southern Europe	Leaf
Bisig-1	SAMN04910819	GSM2136163	9648	Italy	Southern Europe	Leaf
Bivio-1	SAMN04910820	GSM2136164	9649	Italy	Southern Europe	Leaf
Corig-1	SAMN04910821	GSM2136165	9650	Italy	Southern Europe	Leaf
Filet-1	SAMN04910822	GSM2136166	9651	Italy	Southern Europe	Leaf
Fondi-1	SAMN04910823	GSM2136167	9652	Italy	Southern Europe	Leaf
Giffo-1	SAMN04910824	GSM2136168	9653	Italy	Southern Europe	Leaf
Liri-1	SAMN04910825	GSM2136169	9654	Italy	Southern Europe	Leaf
Marce-1	SAMN04910826	GSM2136170	9655	Italy	Southern Europe	Leaf
Marti-1	SAMN04910827	GSM2136171	9656	Italy	Southern Europe	Leaf
Nicas-1	SAMN04910828	GSM2136172	9658	Italy	Southern Europe	Leaf
Pigna-1	SAMN04910829	GSM2136173	9659	Italy	Southern Europe	Leaf
Mitterberg-1-182	SAMN04910830	GSM2136179	9666		Southern Europe	Leaf
Mitterberg-2-184	SAMN04910831	GSM2136180	9668	Italy	Southern Europe	Leaf
Sarno-1	SAMN04910832	GSM2136174	9660	Italy	Southern Europe	Leaf
Cimin-1	SAMN04910833	GSM2136175	9661	Italy	Southern Europe	Leaf
Stilo-1	SAMN04910834	GSM2136176	9662	Italy	Southern Europe	Leaf
Teano-1	SAMN04910835	GSM2136177	9663	Italy	Southern Europe	Leaf
Mitterberg-1-180	SAMN04910836	GSM2136178	9665	Italy	Southern Europe	Leaf
Mitterberg-2-185	SAMN04910837	GSM2136181	9669		Southern Europe	Leaf
Mitterberg-3-189	SAMN04910838	GSM2136182	9673		Southern Europe	Leaf
Mitterberg-4-194	SAMN04910839	GSM2136183	9678	Italy	Southern Europe	Leaf
Castelfed-1-195	SAMN04910840	GSM2136184	9679	Italy	Southern Europe	Leaf
Slavi-2	SAMN04910841	GSM2136215	9723	Bulgaria	Southern Europe	Leaf
Epidauros-1	SAMN04910842	GSM2136216	9725	Greece	Southern Europe	Leaf
Faneronemi-3	SAMN04910843	GSM2136217	9726	Greece	Southern Europe	Leaf
Olympia-2	SAMN04910844	GSM2136218	9727	Greece	Southern Europe	Leaf
Teiu-2	SAMN04910853	GSM2136227	9736	Romania	Southern Europe	Leaf
Ulies-1	SAMN04910854	GSM2136228	9737	Romania	Southern Europe	Leaf
Bran-1	SAMN04910855	GSM2136229	9738	Romania	Southern Europe	Leaf
Toc-1	SAMN04910856	GSM2136230	9739	Romania	Southern Europe	Leaf
Orast-1	SAMN04910857	GSM2136231	9741	Romania	Southern Europe	Leaf
Teiu-1	SAMN04910858	GSM2136232	9742	Romania	Southern Europe	Leaf
Furni-1	SAMN04910859	GSM2136233	9743	Romania	Southern Europe	Leaf
Iasi-1	SAMN04910860	GSM2136234	9744	Romania	Southern Europe	Leaf
Knjas-1	SAMN04910861	GSM2136239	9749	Serbia	Southern Europe	Leaf
Sredn-1	SAMN04910862	GSM2136240	9754	Serbia	Southern Europe	Leaf
Vajug-1	SAMN04910863	GSM2136241	9755	Serbia	Southern Europe	Leaf
Malii-1	SAMN04910865	GSM2136236	9746	Serbia	Southern Europe	Leaf
Zabar-1	SAMN04910866	GSM2136237	9747	Serbia	Southern Europe	Leaf
Zagub-1	SAMN04910867	GSM2136238	9748	Serbia	Southern Europe	Leaf
Staro-2	SAMN04910868	GSM2136242	9756	Serbia	Southern Europe	Leaf
Staro-1	SAMN04910869	GSM2136243	9757		Southern Europe	Leaf
Cha-0	SAMN04910871	GSM2136305	9833	Spain	Southern Europe	Leaf
Cho-0	SAMN04910872	GSM2136306	9834	Spain	Southern Europe	Leaf
Cir-0	SAMN04910873	GSM2136307	9835	Spain	Southern Europe	Leaf
Cod-0	SAMN04910874	GSM2136308	9836	Spain	Southern Europe	Leaf
Cot-0	SAMN04910875	GSM2136309	9838	Spain	Southern Europe	Leaf
Coy-0	SAMN04910876	GSM2136310	9839	Spain	Southern Europe	Leaf
Dar-0	SAMN04910877	GSM2136311	9840	Spain	Southern Europe	Leaf
Ees-0	SAMN04910878	GSM2136312	9841	Spain	Southern Europe	Leaf
Elp-0	SAMN04910879	GSM2136313	9843	Spain	Southern Europe	Leaf
Esn-2	SAMN04910880	GSM2136314	9844	Spain	Southern Europe	Leaf
Evs-0	SAMN04910881	GSM2136315	9845	Spain	Southern Europe	Leaf
Ezc-2	SAMN04910882	GSM2136316	9846	Spain	Southern Europe	Leaf
Glo-1	SAMN04910883	GSM2136317	9848	Spain	Southern Europe	Leaf
Gud-3	SAMN04910884	GSM2136318	9849	Spain	Southern Europe	Leaf
Hec-0	SAMN04910885	GSM2136319	9850	Spain	Southern Europe	Leaf
Hue-3	SAMN04910886	GSM2136320	9851	Spain	Southern Europe	Leaf
Ini-0	SAMN04910887	GSM2136321	9852	Spain	Southern Europe	Leaf
Lac-0	SAMN04910888	GSM2136322	9853	Spain	Southern Europe	Leaf
Laf-1	SAMN04910889	GSM2136323	9854	Spain	Southern Europe	Leaf
Lam-0	SAMN04910890	GSM2136324	9855	Spain	Southern Europe	Leaf
Lch-0	SAMN04910891	GSM2136325	9856	Spain	Southern Europe	Leaf
Loz-0	SAMN04910892	GSM2136326	9858	Spain	Southern Europe	Leaf
Lro-0	SAMN04910893	GSM2136327	9859	Spain	Southern Europe	Leaf
Lum-0	SAMN04910894	GSM2136328	9860	Spain	Southern Europe	Leaf
Mac-0	SAMN04910895	GSM2136329	9861	Spain	Southern Europe	Leaf
Mad-0	SAMN04910896	GSM2136330	9862	Spain	Southern Europe	Leaf
Mat-0	SAMN04910897	GSM2136331	9864	Spain	Southern Europe	Leaf
Mdd-0	SAMN04910898	GSM2136332	9866	Spain	Southern Europe	Leaf
Mie-1	SAMN04910899	GSM2136333	9867	Spain	Southern Europe	Leaf
Moe-0	SAMN04910900	GSM2136334	9868	Spain	Southern Europe	Leaf
Moz-0	SAMN04910901	GSM2136335	9870	Spain	Southern Europe	Leaf
Nac-0	SAMN04910902	GSM2136336	9871	Spain	Southern Europe	Leaf
Nag-0	SAMN04910903	GSM2136337	9872	Spain	Southern Europe	Leaf
Ndc-0	SAMN04910904	GSM2136338	9873	Spain	Southern Europe	Leaf
Oja-0	SAMN04910905	GSM2136339	9874	Spain	Southern Europe	Leaf
Ovi-1	SAMN04910906	GSM2136340	9875	Spain	Southern Europe	Leaf
Pad-0	SAMN04910907	GSM2136341	9876	Spain	Southern Europe	Leaf
Pdl-0	SAMN04910908	GSM2136342	9877	Spain	Southern Europe	Leaf
Pee-0	SAMN04910909	GSM2136343	9878	Spain	Southern Europe	Leaf
Per-0	SAMN04910910	GSM2136344	9879	Spain	Southern Europe	Leaf
Pib-1	SAMN04910911	GSM2136345	9880	Spain	Southern Europe	Leaf
Pie-0	SAMN04910912	GSM2136346	9881	Spain	Southern Europe	Leaf
Pil-0	SAMN04910913	GSM2136347	9882	Spain	Southern Europe	Leaf
Piq-0	SAMN04910914	GSM2136348	9883	Spain	Southern Europe	Leaf
Prd-0	SAMN04910915	GSM2136349	9885	Spain	Southern Europe	Leaf
Pru-0	SAMN04910916	GSM2136350	9886	Spain	Southern Europe	Leaf
Pva-1	SAMN04910917	GSM2136351	9888	Spain	Southern Europe	Leaf
Rib-1	SAMN04910918	GSM2136352	9890	Spain	Southern Europe	Leaf
Sal-0	SAMN04910919	GSM2136353	9891	Spain	Southern Europe	Leaf
Sam-0	SAMN04910920	GSM2136354	9892	Spain	Southern Europe	Leaf
Sca-0	SAMN04910921	GSM2136355	9893	Spain	Southern Europe	Leaf
Sen-0	SAMN04910922	GSM2136356	9894	Spain	Southern Europe	Leaf
Som-0	SAMN04910923	GSM2136359	9898	Spain	Southern Europe	Leaf
Tau-0	SAMN04910924	GSM2136360	9899	Spain	Southern Europe	Leaf
Tri-0	SAMN04910925	GSM2136361	9900	Spain	Southern Europe	Leaf
Urd-1	SAMN04910926	GSM2136362	9901	Spain	Southern Europe	Leaf
Usa-0	SAMN04910927	GSM2136363	9902	Spain	Southern Europe	Leaf
Sfb-6	SAMN04910928	GSM2136357	9895	Spain	Southern Europe	Leaf
Smt-1	SAMN04910929	GSM2136358	9897	Spain	Southern Europe	Leaf
Val-0	SAMN04910930	GSM2136364	9903	Spain	Southern Europe	Leaf
Ace-0	SAMN04910978	GSM2136292	9817	Spain	Southern Europe	Leaf
Amu-0	SAMN04910979	GSM2136293	9819	Spain	Southern Europe	Leaf
Aru-0	SAMN04910980	GSM2136294	9821	Spain	Southern Europe	Leaf
Bos-0	SAMN04910981	GSM2136299	9827	Spain	Southern Europe	Leaf
Bra-0	SAMN04910982	GSM2136300	9828		Southern Europe	Leaf
Bae-0	SAMN04910983	GSM2136295	9823	Spain	Southern Europe	Leaf
Bes-5	SAMN04910984	GSM2136296	9824	Spain	Southern Europe	Leaf
Boa-0	SAMN04910985	GSM2136297	9825	Spain	Southern Europe	Leaf
Bor-0	SAMN04910986	GSM2136298	9826	Spain	Southern Europe	Leaf
Bur-0	SAMN04910987	GSM2136301	9829	Spain	Southern Europe	Leaf
Bus-0	SAMN04910988	GSM2136302	9830	Spain	Southern Europe	Leaf
Cas-0	SAMN04910989	GSM2136303	9831	Spain	Southern Europe	Leaf
Cat-0	SAMN04910990	GSM2136304	9832	Spain	Southern Europe	Leaf
Strand-1	SAMN04910654	GSM2135734	10023		Unknown	Leaf
Aiell-1	SAMN04910817	GSM2136161	9646		Unknown	Leaf
Mt-0	SAMN04910313	GSM2135879	6939	Libya	Western Asia	Leaf
Bak-2	SAMN04910328	GSM2136430	9988	Georgia	Western Asia	Leaf
Bak-7	SAMN04910329	GSM2136431	9989	Georgia	Western Asia	Leaf
Lag2.2	SAMN04910330	GSM2136432	9990	Georgia	Western Asia	Leaf
Vash-1	SAMN04910331	GSM2136433	9991	Georgia	Western Asia	Leaf
Dog-4	SAMN04910332	GSM2136434	9992	Turkey	Western Asia	Leaf
Nemrut-1	SAMN04910333	GSM2136435	9993	Turkey	Western Asia	Leaf
Lag1-5	SAMN04910490	GSM2136005	9103	Georgia	Western Asia	Leaf
Lag1-6	SAMN04910491	GSM2136006	9104	Georgia	Western Asia	Leaf
Lag1-7	SAMN04910492	GSM2136007	9105	Georgia	Western Asia	Leaf
Lag1-8	SAMN04910493	GSM2136008	9106	Georgia	Western Asia	Leaf
Lag2-4	SAMN04910494	GSM2136009	9111	Georgia	Western Asia	Leaf
Lag2-6	SAMN04910495	GSM2136010	9113	Georgia	Western Asia	Leaf
Lag2-7	SAMN04910496	GSM2136011	9114	Georgia	Western Asia	Leaf
Lag2-10	SAMN04910497	GSM2136012	9115	Georgia	Western Asia	Leaf
Bak-5	SAMN04910498	GSM2136013	9121	Georgia	Western Asia	Leaf
Geg-14	SAMN04910499	GSM2136014	9125	Armenia	Western Asia	Leaf
Yeg-2	SAMN04910500	GSM2136015	9128	Armenia	Western Asia	Leaf
Yeg-4	SAMN04910501	GSM2136016	9130	Armenia	Western Asia	Leaf
Yeg-5	SAMN04910502	GSM2136017	9131	Armenia	Western Asia	Leaf
Yeg-7	SAMN04910503	GSM2136018	9133	Armenia	Western Asia	Leaf
Yeg-8	SAMN04910504	GSM2136019	9134	Armenia	Western Asia	Leaf
Xan-3	SAMN04910537	GSM2135992	9067	Azerbaijan	Western Asia	Leaf
Lerik1-4	SAMN04910538	GSM2135993	9075	Azerbaijan	Western Asia	Leaf
Lerik1-7	SAMN04910539	GSM2135994	9078	Azerbaijan	Western Asia	Leaf
Lerik2-1	SAMN04910540	GSM2135995	9079	Azerbaijan	Western Asia	Leaf
Lerik2-3	SAMN04910541	GSM2135996	9081	Azerbaijan	Western Asia	Leaf
Lerik2-6	SAMN04910542	GSM2135997	9084	Azerbaijan	Western Asia	Leaf
Lerik2-7	SAMN04910543	GSM2135998	9085	Azerbaijan	Western Asia	Leaf
Nar-3	SAMN04910544	GSM2135999	9089	Azerbaijan	Western Asia	Leaf
Nar-5	SAMN04910545	GSM2136000	9091	Azerbaijan	Western Asia	Leaf
Istisu-5	SAMN04910546	GSM2136001	9095	Azerbaijan	Western Asia	Leaf
Istisu-9	SAMN04910547	GSM2136002	9099	Azerbaijan	Western Asia	Leaf
Lag1-2	SAMN04910548	GSM2136003	9100	Georgia	Western Asia	Leaf
Lag1-4	SAMN04910549	GSM2136004	9102	Georgia	Western Asia	Leaf
Yeg-1	SAMN04910642	GSM2135721	10011	Armenia	Western Asia	Leaf
Istisu-1	SAMN04910643	GSM2135722	10012		Western Asia	Leaf
Lerik1-3	SAMN04910644	GSM2135723	10013	Azerbaijan	Western Asia	Leaf
Sha	SAMN04910645	GSM2135725	10015	Afghanistan	Western Asia	Leaf
Xan-1	SAMN04910659	GSM2135724	10014	Azerbaijan	Western Asia	Leaf
Anz-0	SAMN04910870	GSM2136244	9759	Iran, Islamic Republic of	Western Asia	Leaf
CIBC-17	SAMN04910310	GSM2135872	6907	United Kingdom	Western Europe	Leaf
CIBC-5	SAMN04910311	GSM2135873	6908	United Kingdom	Western Europe	Leaf
NFA-10	SAMN04910314	GSM2135880	6943	United Kingdom	Western Europe	Leaf
NFA-8	SAMN04910315	GSM2135881	6944	United Kingdom	Western Europe	Leaf
HR-10	SAMN04910317	GSM2135876	6923	United Kingdom	Western Europe	Leaf
Ren-11	SAMN04910321	GSM2135883	6960	France	Western Europe	Leaf
Sq-1	SAMN04910322	GSM2135884	6966	United Kingdom	Western Europe	Leaf
11C1	SAMN04910430	GSM2136035	9503	United Kingdom	Western Europe	Leaf
Alst-1	SAMN04910466	GSM2135891	6989	United Kingdom	Western Europe	Leaf
Ang-0	SAMN04910467	GSM2135892	6992	Belgium	Western Europe	Leaf
Bur-0	SAMN04910471	GSM2135896	7058	Ireland	Western Europe	Leaf
Durh-1	SAMN04910477	GSM2135902	7107	United Kingdom	Western Europe	Leaf
Edi-0	SAMN04910478	GSM2135903	7111	United Kingdom	Western Europe	Leaf
Hi-0	SAMN04910483	GSM2135908	7167	Netherlands	Western Europe	Leaf
Le-0	SAMN04910487	GSM2135912	7218	Netherlands	Western Europe	Leaf
Edinburgh-1	SAMN04910506	GSM2136021	9298	United Kingdom	Western Europe	Leaf
Ullapool-8	SAMN04910507	GSM2136022	9312	United Kingdom	Western Europe	Leaf
Gol-2	SAMN04910508	GSM2136023	9314	United Kingdom	Western Europe	Leaf
Na-1	SAMN04910522	GSM2135977	8343	France	Western Europe	Leaf
Kent	SAMN04910567	GSM2135962	8238	United Kingdom	Western Europe	Leaf
PHW-34	SAMN04910569	GSM2135964	8244	France	Western Europe	Leaf
Cen-0	SAMN04910575	GSM2135970	8275	France	Western Europe	Leaf
Rhen-1	SAMN04910588	GSM2135923	7316	Netherlands	Western Europe	Leaf
Rou-0	SAMN04910589	GSM2135924	7320	France	Western Europe	Leaf
Tha-1	SAMN04910596	GSM2135931	7353	Netherlands	Western Europe	Leaf
Ven-1	SAMN04910607	GSM2135937	7384	Netherlands	Western Europe	Leaf
Kil-0	SAMN04910610	GSM2135795	5748	United Kingdom	Western Europe	Leaf
UKID63	SAMN04910611	GSM2135796	5768		Western Europe	Leaf
Set-1	SAMN04910612	GSM2135797	5772	United Kingdom	Western Europe	Leaf
Sna-1	SAMN04910613	GSM2135798	5778	United Kingdom	Western Europe	Leaf
UKID74	SAMN04910614	GSM2135799	5779	United Kingdom	Western Europe	Leaf
Ty-1	SAMN04910615	GSM2135800	5784	United Kingdom	Western Europe	Leaf
UKID93	SAMN04910616	GSM2135801	5798		Western Europe	Leaf
UKID96	SAMN04910617	GSM2135802	5800	United Kingdom	Western Europe	Leaf
UKID107	SAMN04910618	GSM2135803	5811	United Kingdom	Western Europe	Leaf
UKID114	SAMN04910619	GSM2135804	5818	United Kingdom	Western Europe	Leaf
UKID116	SAMN04910620	GSM2135805	5822	United Kingdom	Western Europe	Leaf
App1-14	SAMN04910621	GSM2135806	5831		Western Europe	Leaf
UKSW06-207	SAMN04910665	GSM2135769	4807	United Kingdom	Western Europe	Leaf
UKSW06-226	SAMN04910666	GSM2135770	4826	United Kingdom	Western Europe	Leaf
UKSW06-285	SAMN04910667	GSM2135771	4884	United Kingdom	Western Europe	Leaf
UKSW06-333	SAMN04910668	GSM2135772	4931	United Kingdom	Western Europe	Leaf
UKSW06-341	SAMN04910669	GSM2135773	4939		Western Europe	Leaf
UKSW06-360	SAMN04910670	GSM2135774	4958	United Kingdom	Western Europe	Leaf
UKSE06-118	SAMN04910671	GSM2135775	5023	United Kingdom	Western Europe	Leaf
UKSE06-252	SAMN04910673	GSM2135777	5104	United Kingdom	Western Europe	Leaf
UKSE06-325	SAMN04910674	GSM2135778	5151	United Kingdom	Western Europe	Leaf
UKSE06-432	SAMN04910675	GSM2135779	5210	United Kingdom	Western Europe	Leaf
UKSE06-470	SAMN04910676	GSM2135780	5236	United Kingdom	Western Europe	Leaf
UKSE06-533	SAMN04910677	GSM2135781	5276	United Kingdom	Western Europe	Leaf
UKSE06-541	SAMN04910678	GSM2135782	5279	United Kingdom	Western Europe	Leaf
UKSE06-639	SAMN04910679	GSM2135783	5349	United Kingdom	Western Europe	Leaf
UKNW06-003	SAMN04910680	GSM2135784	5353	United Kingdom	Western Europe	Leaf
UKNW06-102	SAMN04910681	GSM2135785	5395	United Kingdom	Western Europe	Leaf
UKNW06-233	SAMN04910682	GSM2135786	5486	United Kingdom	Western Europe	Leaf
UKNW06-354	SAMN04910683	GSM2135787	5535	United Kingdom	Western Europe	Leaf
UKNW06-403	SAMN04910684	GSM2135788	5577	United Kingdom	Western Europe	Leaf
UKNW06-481	SAMN04910685	GSM2135789	5644	United Kingdom	Western Europe	Leaf
Bra-1	SAMN04910686	GSM2135790	5717	United Kingdom	Western Europe	Leaf
UKID11	SAMN04910687	GSM2135791	5718		Western Europe	Leaf
Cal-2	SAMN04910688	GSM2135792	5720	United Kingdom	Western Europe	Leaf
Cnt-1	SAMN04910689	GSM2135793	5726	United Kingdom	Western Europe	Leaf
For-2	SAMN04910690	GSM2135794	5741	United Kingdom	Western Europe	Leaf
ENC-2-1	SAMN04910784	GSM2136368	9907	France	Western Europe	Leaf
ESP-1-11	SAMN04910785	GSM2136369	9908	France	Western Europe	Leaf
GEN-8	SAMN04910786	GSM2136370	9909	France	Western Europe	Leaf
ARGE-1-15	SAMN04910787	GSM2136371	9911	France	Western Europe	Leaf
CON-7	SAMN04910788	GSM2136372	9913	France	Western Europe	Leaf
MAR-4-16	SAMN04910789	GSM2136373	9915	France	Western Europe	Leaf
SAUL-24	SAMN04910790	GSM2136374	9918	France	Western Europe	Leaf
DIR-9	SAMN04910791	GSM2136375	9920	France	Western Europe	Leaf
FOR-23	SAMN04910792	GSM2136376	9921	France	Western Europe	Leaf
PLY-20	SAMN04910793	GSM2136377	9924	France	Western Europe	Leaf
ARR-17	SAMN04910794	GSM2136378	9927		Western Europe	Leaf
BEZ-9	SAMN04910795	GSM2136379	9928	France	Western Europe	Leaf
ISS-20	SAMN04910796	GSM2136380	9929	France	Western Europe	Leaf
LEC-25	SAMN04910797	GSM2136381	9930		Western Europe	Leaf
MOU2-25	SAMN04910798	GSM2136382	9931	France	Western Europe	Leaf
VED-10	SAMN04910799	GSM2136383	9933	France	Western Europe	Leaf
QUI-8	SAMN04910800	GSM2136384	9934	France	Western Europe	Leaf
LCL-16	SAMN04910801	GSM2136385	9936	France	Western Europe	Leaf
CATS-6	SAMN04910802	GSM2136386	9937	France	Western Europe	Leaf
WAV-8	SAMN04910803	GSM2136387	9938	France	Western Europe	Leaf
LDV-18	SAMN04910934	GSM2135738	108	France	Western Europe	Leaf
LDV-46	SAMN04910937	GSM2135741	139		Western Europe	Leaf
MAR2-3	SAMN04910939	GSM2135743	159	France	Western Europe	Leaf
PYL-6	SAMN04910957	GSM2135761	265	France	Western Europe	Leaf
TOU-A1-88	SAMN04910958	GSM2135762	350	France	Western Europe	Leaf
TOU-A1-89	SAMN04910959	GSM2135763	351	France	Western Europe	Leaf
Sr	SAMN04910341	GSM2135826				Leaf
Sr	SAMN04910529	GSM2135984			#N/A	Leaf

## Sheet: Table S6
Table S6: lincRNA features used in machine learing
ID	id	exon_number	polyA length	FPKM	as_number	m6A	m5C	length	TE_number	CG_content	peptide_length	Fickett_score	pI	ORF_integrity	coding_probability	coding_label	A%	T%	C%	G%	AA%	AT%	AC%	AG%	TA%	TT%	TC%	TG%	CA%	CT%	CC%	CG%	GA%	GT%	GC%	GG%	Class
1	MSTRG.1004	2	127.41	0.842604	1	NA	NA	783	0	33.72	41	0.42336	8.53485	1	0.0215174	-1	37.55	28.74	18.14	15.58	16.5	8.95	7.16	4.86	9.21	9.85	4.73	4.99	5.37	5.63	3.84	3.32	6.52	4.22	2.43	2.43	0
2	MSTRG.10101	3	156.245	2.96689	3	NA	NA	1737	0	34.77	50	0.34546	10.0196	1	0.0252741	-1	40.18	25.04	20.55	14.22	17.86	9.04	7.32	5.99	7.26	7.89	5.59	4.32	9.45	5.3	4.09	1.73	5.65	2.76	3.57	2.19	0
3	MSTRG.10108	3	131.09	7.09945	1	1	NA	3749	1	37.58	86	0.30336	9.29987	1	0.062801	-1	30.22	32.2	22.27	15.31	10.89	7.92	6.08	5.31	6.56	11.77	8.7	5.18	7.66	8.08	4.8	1.73	5.12	4.43	2.69	3.07	0
4	MSTRG.10575	2	67.13	25.1577	1	NA	6.59218	697	0	35.44	53	0.33873	8.21185	1	0.0190104	-1	36.3	28.26	19.23	16.21	14.8	9.34	5.6	6.61	7.33	8.33	7.9	4.74	7.33	6.47	3.02	2.3	6.9	4.02	2.73	2.59	0
5	MSTRG.10755	2	65.64	4.87603	2	0	NA	814	2	36.61	75	0.29592	9.18451	1	0.0420766	-1	35.75	27.64	17.08	19.53	10.33	9.72	5.04	10.7	5.54	10.46	7.13	4.43	6.77	4.92	3.69	1.72	13.04	2.58	1.23	2.71	1
6	MSTRG.10768	4	91.99	3.44359	4	NA	NA	3133	1	39.87	56	0.40808	9.38141	1	0.0490521	-1	32.43	27.71	21.74	18.13	10.89	8.01	6.58	6.96	5.27	8.94	7.66	5.81	8.65	6.35	4.09	2.65	7.6	4.41	3.42	2.71	0
7	MSTRG.10813	3	98.2275	10.3865	4	0.5	NA	2744	1	35.6	84	0.32147	7.57233	1	0.0666651	-1	33.24	31.16	21.21	14.4	12.03	8.93	7.07	5.21	6.67	11.56	7.07	5.83	8.53	7.22	4.08	1.39	6.02	3.46	2.99	1.93	1
8	MSTRG.10842	3	67.87	100.819	2	0.1163	6.18271	5053	1	33.21	138	0.28949	7.63385	1	0.342654	-1	33.54	33.25	15.63	17.57	12.29	10.41	5.44	5.4	9.48	12.15	5.09	6.53	5.34	5.11	2.83	2.34	6.43	5.58	2.28	3.29	0
9	MSTRG.10850	2	99.52	1.19381	2	0.875	9.07069	3301	1	37.59	78	0.3948	9.35797	1	0.116911	-1	31.48	30.93	23.08	14.51	10.3	8.88	7.55	4.76	7.94	10.27	7.7	5.03	8.7	7	5	2.39	4.55	4.76	2.85	2.33	1
10	MSTRG.1086	2	59.265	4.73784	2	NA	3.45679	710	1	37.89	79	0.37794	10.0197	1	0.105518	-1	34.37	27.75	23.24	14.65	12.27	7.9	8.46	5.78	5.08	11.42	7.05	4.23	10.16	5.92	4.94	2.26	6.91	2.54	2.68	2.4	1
11	MSTRG.10990	2	84.285	16.3593	2	NA	3.32226	993	0	31.92	56	0.34867	7.66632	1	0.022092	-1	26.28	41.79	16.92	15.01	5.95	11.9	3.83	4.64	9.78	16.03	8.77	7.16	4.54	7.76	2.82	1.81	6.05	6.05	1.51	1.41	0
12	MSTRG.11329	2	92.64	1.0926	2	NA	NA	812	1	38.79	74	0.27118	7.64459	1	0.042133	-1	26.48	34.73	23.65	15.15	9.12	7.03	4.93	5.43	5.43	12.82	10.85	5.55	7.27	9.37	4.69	2.34	4.69	5.43	3.21	1.85	0
13	MSTRG.11343	2	93.525	0.61497	1	NA	NA	490	0	38.78	61	0.32654	9.69025	1	0.0322328	-1	23.88	37.35	22.86	15.92	7.77	5.73	6.34	4.09	3.68	17.59	9.2	6.75	6.13	9.2	4.91	2.66	6.13	4.91	2.45	2.45	0
14	MSTRG.11475	2	124.2	4.53552	1	1	NA	959	1	33.16	47	0.32577	11.5816	1	0.0253232	-1	37.23	29.61	20.33	12.83	14.2	11.9	6.16	5.01	7.41	10.13	7.52	4.49	9.19	4.7	4.8	1.67	6.37	2.92	1.88	1.67	1
15	MSTRG.11734	5	139.3	0.847576	1	NA	NA	1689	0	35.88	54	0.32528	9.16254	1	0.0221907	-1	37.83	26.29	19.66	16.22	14.75	8.47	6.81	7.82	6.75	8.83	6.04	4.68	9.24	5.69	3.08	1.6	7.11	3.26	3.73	2.13	0
16	MSTRG.11744	2	146.65	4.40668	1	NA	NA	1034	3	33.66	44	0.27464	9.69403	1	0.0194709	-1	38.39	27.95	16.34	17.31	14.42	10.94	6.1	6.87	7.26	8.91	5.61	6.2	7.55	4.26	2.71	1.84	9.2	3.87	1.94	2.32	1
17	MSTRG.11755	3	95.845	105.417	5	0.39585	3.58654	3840	1	40.65	409	0.40766	7.70001	1	1	1	26.95	32.4	16.28	24.38	8.6	7.71	3.46	7.16	5.34	12.45	6.49	8.13	4.56	5.83	2.94	2.94	8.47	6.38	3.39	6.15	0
18	MSTRG.11780	4	101.895	12.0269	3	0.60715	5.1728	1407	1	35.25	48	0.32318	4.74921	1	0.027133	-1	27.36	37.38	16.06	19.19	8.18	8.96	4.27	5.97	6.47	16.29	6.26	8.32	5.05	7.11	2.28	1.64	7.68	5.05	3.27	3.2	0
19	MSTRG.11916	4	86.3	18.4044	2	NA	NA	1298	1	41.6	57	0.33597	6.73468	1	0.0226935	-1	36.75	21.65	15.18	26.43	13.8	5.71	4.63	12.64	3.78	6.94	4.86	6.01	6.09	4.16	2.62	2.31	13.11	4.86	3.08	5.4	0
20	MSTRG.11926	8	258.27	5.50793	3	0.25	8.79574	3248	1	41.04	108	0.37205	5.8205	1	0.450983	-1	26.2	32.76	18.81	22.23	7.39	6.96	3.73	8.1	5.45	12.23	8.01	7.08	5.82	7.48	3.88	1.63	7.55	6.07	3.2	5.42	1
21	MSTRG.11960	2	70.435	16.8256	1	NA	8.67978	638	1	34.01	50	0.37909	5.01312	1	0.0368903	-1	27.27	38.71	15.36	18.65	10.05	7.85	3.92	5.34	5.97	16.17	8.01	8.63	5.81	6.44	1.57	1.57	5.49	8.16	1.88	3.14	0
22	MSTRG.11976	3	64.905	7.53529	1	NA	6.21884	951	1	39.75	30	0.36542	3.7973	1	0.0190131	-1	32.18	28.08	20.93	18.82	9.79	8.11	6.53	7.68	8.21	8.42	6.11	5.37	6.95	6.53	5.05	2.42	7.26	4.95	3.26	3.37	1
23	MSTRG.12047	2	84.44	21.2461	2	0	4.17094	2389	2	29.47	40	0.23373	8.21039	1	0.0264179	-1	38.38	32.15	14.9	14.57	16.37	11.31	4.44	6.28	8.33	12.65	6.16	5.03	6.57	4.48	2.76	1.09	7.12	3.69	1.55	2.18	1
24	MSTRG.12056	4	79.4075	14.9109	7	NA	NA	2559	2	34.74	131	0.2958	5.42853	1	0.595163	1	37.05	28.21	17.55	17.19	14.46	9.34	5.75	7.47	7.9	8.84	6.57	4.93	7.15	5.59	2.58	2.23	7.54	4.42	2.66	2.58	0
25	MSTRG.12058	2	85.655	2.65658	1	0.337033	8.19803	1243	2	38.78	42	0.30942	6.79315	1	0.0106408	-1	25.34	35.88	16.49	22.28	7.97	8.37	3.46	5.56	5.96	14.81	7	8.05	4.35	5.88	3.22	3.06	7.09	6.76	2.82	5.64	1
26	MSTRG.12082	3	151.03	4.00648	3	0.25	9.02147	3034	1	41.76	340	0.44376	9.82831	1	0.999998	1	30.72	27.52	16.64	25.12	9.63	7.78	4.78	8.54	4.88	8.61	5.01	9	7.52	5.01	2.37	1.75	8.67	6.13	4.48	5.84	1
27	MSTRG.12083	2	50.38	5.80986	1	NA	NA	851	1	36.43	86	0.27819	9.89606	1	0.0588351	-1	34.67	28.91	22.8	13.63	13.06	9.06	8.47	4.12	5.65	11.29	7.76	4.12	10.12	6.24	4.35	2.12	5.76	2.35	2.24	3.29	1
28	MSTRG.12085	2	74.37	23.3995	1	NA	4.08915	905	0	29.83	33	0.33635	5.30267	1	0.00912533	-1	27.96	42.21	11.27	18.56	9.51	12.17	1.55	4.65	8.41	17.7	7.74	8.41	3.76	4.76	0.88	1.88	6.31	7.63	1.11	3.54	1
29	MSTRG.12086	4	59.76	0.356509	1	NA	NA	1050	0	39.33	62	0.39101	9.18268	1	0.052154	-1	34.1	26.57	22.1	17.24	13.73	7.72	7.72	4.86	5.15	8.29	7.15	6.01	7.05	6.77	4.86	3.43	8.2	3.72	2.38	2.96	0
30	MSTRG.12089	3	104.28	0	1	NA	NA	1191	1	31.74	36	0.33116	9.18231	1	0.011164	-1	35.01	33.25	11.34	20.4	13.45	10.5	3.28	7.82	8.74	12.94	4.62	6.89	4.71	3.53	1.43	1.68	8.07	6.3	2.02	4.03	0
31	MSTRG.12098	5	201.853	58.8835	2	0.592879	8.08522	437958	250	37.33	698	0.2831	7.24689	1	1	1	31.36	31.31	18.52	18.8	11	8.9	5.29	6.18	7.5	10.97	6.41	6.44	6.43	6.03	3.66	2.41	6.45	5.41	3.16	3.78	1
32	MSTRG.12111	3	190.96	14.3224	3	0.5284	7.09025	5599	4	42.72	80	0.31	9.12787	1	0.0529375	-1	28.9	28.38	21.36	21.36	9.04	6.95	5.56	7.36	5.61	8.29	7.72	6.77	6.75	7	4.25	3.36	7.5	6.15	3.82	3.88	1
33	MSTRG.12112	6	203.767	27.2289	5	0.40475	9.54834	17647	6	42.77	127	0.30132	9.58136	1	0.205206	-1	29.86	27.36	21.36	21.41	9.73	6.86	5.79	7.48	5.11	7.65	7.58	7.03	7.63	7.15	4.06	2.52	7.4	5.71	3.93	4.38	1
34	MSTRG.12113	2	191.875	0	2	NA	NA	36603	22	38.72	153	0.28719	8.91632	1	0.355155	-1	30.84	30.44	20.25	18.47	10.79	8.63	5.42	5.99	6.69	9.72	7.66	6.38	7.12	6.77	3.87	2.49	6.24	5.32	3.3	3.6	1
35	MSTRG.12117	5	128.685	9.5016	3	0.342833	8.03866	2297	1	47.54	137	0.33639	11.8926	1	0.236661	-1	29.17	23.29	24.42	23.12	9.71	5.71	6.18	7.53	4.97	6.27	6.79	5.27	6.93	6.75	6.49	4.27	7.58	4.53	4.97	6.05	1
36	MSTRG.12122	4	179.93	3.55143	3	NA	NA	2867	1	40.08	77	0.36709	10.9075	1	0.0870124	-1	25.6	34.32	20.58	19.5	7.19	7.33	4.85	6.21	5.76	12.81	8.48	7.29	6.04	8.06	3.7	2.79	6.63	6.14	3.56	3.18	1
37	MSTRG.12124	2	96.46	2.48241	1	0.30286	NA	1589	0	42.04	86	0.48965	3.85675	1	0.516973	1	30.27	27.69	18.88	23.16	10.96	7.56	3.46	8.25	5.1	9.7	6.8	6.11	5.67	5.79	4.6	2.83	8.56	4.66	4.03	5.92	1
38	MSTRG.12128	1	NA	NA	1	NA	NA	473	1	44.19	27	0.42664	10.0443	1	0.0170419	-1	30.66	25.16	23.89	20.3	9.53	6.78	5.51	8.9	5.3	8.69	5.72	5.3	8.05	6.14	6.57	3.18	7.84	3.6	6.14	2.75	1
39	MSTRG.12135	2	80.485	12.7172	3	0.414317	7.80505	5842	6	42.25	128	0.33775	9.56793	1	0.333195	-1	31.58	26.17	22.01	20.23	10.87	7.31	6.97	6.42	6.25	7.17	6.81	5.94	7.26	6.64	4.91	3.2	7.21	5.05	3.32	4.66	1
40	MSTRG.12140	2	84.35	14.161	1	NA	5.60345	701	1	35.95	32	0.43575	11.8393	1	0.0293099	-1	41.65	22.4	15.98	19.97	19.29	8	6.14	8.14	6.14	8.86	2.86	4.57	6.57	2.29	4	3.14	9.71	3.14	3	4.14	0
41	MSTRG.12141	3	74.265	24.0594	1	NA	3.90694	1346	0	35.81	41	0.37905	8.23029	1	0.0136433	-1	34.03	30.16	20.06	15.75	12.64	8.85	6.1	6.39	7.21	9.67	7.58	5.72	8.25	7.21	3.12	1.49	5.87	4.46	3.27	2.16	1
42	MSTRG.12142	7	134.743	9.29636	2	0.235733	7.3083	7719	5	39.18	144	0.28159	10.3723	1	0.21542	-1	31.34	29.49	22.24	16.93	9.83	8.89	6.35	6.27	6.37	9.38	7.9	5.82	9.07	6.97	4.38	1.83	6.05	4.25	3.61	3.02	1
43	MSTRG.12156	3	96.625	3.23841	2	0.1	NA	792	1	31.31	69	0.33319	9.3587	1	0.0427705	-1	36.49	32.2	17.93	13.38	14.41	11.63	5.94	4.42	8.47	12.39	6.83	4.55	7.59	4.93	2.78	2.65	6.07	3.16	2.4	1.77	0
44	MSTRG.12164	4	118.875	40.4579	7	NA	0.934181	1874	4	30.79	38	0.28116	9.30121	1	0.0140212	-1	33.19	36.02	15.31	15.47	12.23	11.59	4.59	4.75	9.45	14.04	6.25	6.3	6.19	4.86	2.08	2.19	5.29	5.55	2.4	2.24	1
45	MSTRG.12166	12	209.3	8.35323	7	0.277767	NA	2931	1	34.25	72	0.27816	9.91803	1	0.0414668	-1	35.52	30.23	19.17	15.08	13.28	9.8	6.42	6.04	8.02	10.17	6.42	5.63	7.65	6.59	3.72	1.19	6.59	3.65	2.63	2.22	1
46	MSTRG.12171	8	143.845	1.69297	1	0.4619	NA	10623	5	34.12	108	0.29643	9.72235	1	0.115711	-1	32.77	33.11	18	16.13	11.31	10.39	5.28	5.79	8.24	11.24	7.14	6.5	7.1	6.47	3.08	1.36	6.12	5.01	2.5	2.49	1
47	MSTRG.12172	1	34.58	0.09841	1	NA	NA	270	1	43.33	25	0.40233	7.95319	-1	0.0308659	-1	25.93	30.74	24.81	18.52	4.83	5.58	7.43	7.81	6.69	12.27	8.18	3.72	8.18	7.06	5.58	4.09	6.32	5.95	3.35	2.97	0
48	MSTRG.12180	2	46.06	1.87277	1	0	NA	670	2	37.01	62	0.37999	8.34027	1	0.0408649	-1	29.55	33.43	16.87	20.15	10.31	10.16	2.69	6.43	6.58	10.16	8.97	7.62	4.33	7.03	3.44	2.09	8.37	6.13	1.64	4.04	0
49	MSTRG.12185	11	166.875	28.4314	10	0.435575	4.73223	5920	4	39.04	349	0.29615	6.01715	1	0.999967	1	29	31.96	17.69	21.35	9.33	9.11	4.46	6.12	6.86	11.07	6.35	7.67	5.58	5.71	3.33	3.07	7.25	6.08	3.53	4.49	1
50	MSTRG.12192	12	167.608	3.23943	2	NA	NA	2992	1	33.89	72	0.32736	9.69513	1	0.0479945	-1	35.33	30.78	19.18	14.71	13.41	10.03	6.12	5.75	8.12	10.83	6.19	5.65	7.15	6.59	4.18	1.27	6.62	3.34	2.71	2.04	1
51	MSTRG.12208	2	61	2.65726	1	0.3333	NA	677	1	37.37	44	0.35233	9.89642	1	0.0201108	-1	31.76	30.87	18.91	18.46	11.09	8.14	4.73	7.69	6.36	11.69	8.43	4.44	4.73	6.8	3.55	3.85	9.62	4.29	2.07	2.51	1
52	MSTRG.12213	3	123.52	4.93413	2	NA	NA	979	3	36.98	53	0.27639	7.87714	1	0.0190641	-1	21.96	41.06	16.96	20.02	5.83	8.69	2.86	4.5	5.52	17.08	8.38	10.12	4.81	7.57	2.25	2.35	5.83	7.67	3.48	3.07	1
53	MSTRG.12217	2	78.38	1.37496	1	NA	NA	2288	3	30.81	53	0.37376	10.0641	1	0.0347406	-1	36.76	32.43	18.09	12.72	13.38	12.51	6.12	4.77	10.36	11.11	6.65	4.33	7.65	5.12	3.63	1.71	5.38	3.72	1.71	1.88	1
54	MSTRG.12223	2	83.04	30.4661	1	0	8.69606	2854	1	41.77	151	0.35683	8.85577	1	0.695583	1	27.05	31.18	20.53	21.23	7.29	7.61	5.12	7.05	5.96	11.15	7.29	6.8	6.66	6.87	4.24	2.77	7.15	5.57	3.86	4.63	1
55	MSTRG.12224	2	NA	NA	1	NA	NA	671	1	46.05	108	0.32628	10.2032	1	0.155907	-1	23.4	30.55	29.36	16.69	3.13	6.42	9.25	4.63	5.22	10.9	10	4.48	9.4	8.66	6.72	4.63	5.67	4.63	3.28	2.99	1
56	MSTRG.12233	5	125.545	1667.32	11	0.1667	7.64139	20710	13	41.74	513	0.3	5.67291	1	1	1	29.09	29.17	18.91	22.82	8.2	7.35	5.31	8.22	6.21	9.47	6.23	7.25	6.46	5.97	3.86	2.62	8.21	6.37	3.51	4.73	1
57	MSTRG.12234	2	77.795	0	2	NA	NA	12410	9	43.1	513	0.32661	5.67291	1	1	1	28.5	28.4	21.7	21.4	7.8	7.18	6.03	7.49	5.19	8.74	7.34	7.12	7.53	7.15	4.48	2.54	7.98	5.33	3.85	4.24	1
58	MSTRG.12235	1	143.795	0	1	NA	NA	436	1	38.3	6	0.35227	4.29816	1	0.00291619	-1	25	36.7	13.3	25	5.98	8.74	3.22	7.13	8.51	14.94	4.83	8.51	4.14	4.37	2.53	2.3	6.44	8.74	2.76	6.9	1
59	MSTRG.12239	2	193.28	13.6323	1	NA	NA	831	2	33.57	49	0.35297	8.65997	-1	0.0864702	-1	29.84	36.58	13	20.58	7.59	10.84	3.86	7.47	10.96	13.61	4.58	7.47	4.22	4.46	2.05	2.29	6.99	7.71	2.53	3.37	1
60	MSTRG.12241	5	195.347	19.131	2	0.400687	7.81655	3010	1	41.16	68	0.36432	11.2713	1	0.0596906	-1	34.35	24.49	19.07	22.09	11.4	7.05	6.35	9.54	5.58	6.85	6.21	5.85	7.38	5.95	2.99	2.76	10	4.62	3.52	3.95	1
61	MSTRG.12244	2	60.4275	27.3821	2	0.3333	4.36848	1067	1	36.83	47	0.41699	10.114	1	0.0414323	-1	37.21	25.96	18.28	18.56	16.42	8.54	5.44	6.85	5.91	7.97	6.75	5.35	7.5	4.69	3.38	2.72	7.41	4.69	2.72	3.66	1
62	MSTRG.12249	2	59.155	1.99435	2	NA	NA	898	1	38.31	41	0.39559	3.69257	1	0.0584502	-1	30.96	30.73	15.48	22.83	8.92	10.81	4.35	6.8	8.58	9.03	5.13	8.03	4.57	4.79	3.01	3.12	8.92	6.02	3.01	4.91	1
63	MSTRG.12250	3	133.73	9.74315	1	0.8333	5.61404	1467	1	37.29	76	0.39571	6.38153	1	0.115628	-1	27.54	35.17	17.04	20.25	8.66	8.94	4.91	5.05	7.71	13.1	6.55	7.84	5.8	5.46	2.73	3.07	5.39	7.71	2.8	4.3	1
64	MSTRG.12251	2	45.83	10.2399	3	0.7	6.09459	888	1	40.99	117	0.43779	5.92462	1	0.782132	1	28.72	30.29	17.12	23.87	8.34	7.67	5.41	7.33	6.99	11.27	5.19	6.88	4.62	5.07	3.38	3.95	8.79	6.2	3.16	5.75	0
65	MSTRG.12255	2	NA	NA	3	0.75	NA	866	1	41.22	117	0.44244	5.92462	1	0.789172	1	28.52	30.25	17.09	24.13	7.86	7.86	5.43	7.4	7.05	11.33	4.97	6.82	4.97	4.86	3.35	3.93	8.67	6.24	3.35	5.9	1
66	MSTRG.12260	1	124.33	0	1	NA	NA	4920	1	42.99	237	0.37434	4.97784	1	0.999783	1	27.87	29.15	21.44	21.54	7.14	7.34	5.73	7.64	5.59	9.29	7.44	6.83	7.05	7.3	4.25	2.85	8.09	5.2	4.03	4.23	0
67	MSTRG.12261	2	49.68	2807.71	13	0.1114	6.93163	13126	0	51.58	203	0.27554	5.31488	1	0.978528	1	25.82	22.37	22.43	29.38	8.47	5.5	4.88	6.96	3.56	5.96	7	5.86	4.36	4.3	5.74	8.03	9.42	6.61	4.81	8.54	1
68	MSTRG.12262	3	54.15	22.972	1	1	NA	11097	0	52.01	203	0.29864	5.31488	1	0.983993	1	25.16	22.83	22.64	29.38	8.18	5.57	4.72	6.68	3.71	6.16	6.86	6.09	4.33	4.52	5.81	7.97	8.92	6.57	5.25	8.64	0
69	MSTRG.12265	6	172.23	8.41653	3	NA	8.51496	1990	2	34.72	62	0.2905	9.51923	1	0.029219	-1	26.13	39.15	18.14	16.58	7.94	9.55	3.82	4.78	8.35	14.68	8.85	7.29	4.73	8.2	3.22	2.01	5.13	6.74	2.26	2.46	0
70	MSTRG.12269	2	94.315	11.4009	2	0.60895	8.12263	4672	4	41.01	293	0.34547	5.5827	1	0.999959	1	29.54	29.45	20.8	20.21	8.82	7.62	5.22	7.88	5.54	10.75	7	6.17	7.06	6.59	4.86	2.27	8.09	4.5	3.73	3.9	1
71	MSTRG.12270	7	86.035	9.57294	3	NA	NA	11509	1	36.15	96	0.32464	7.8537	1	0.109571	-1	30.71	33.15	18.06	18.09	10.7	9.37	4.67	5.97	7.54	12	6.59	7.02	6.74	6.03	3.48	1.8	5.73	5.75	3.31	3.3	1
72	MSTRG.12278	4	180.88	26.709	5	0.333075	6.85784	6870	2	41.67	163	0.32642	5.76349	1	0.896633	1	28.01	30.32	19.55	22.13	8.56	7.1	4.69	7.66	5.63	11.18	6.52	6.97	6.27	6.3	4.22	2.75	7.53	5.74	4.12	4.75	1
73	MSTRG.12288	2	73.64	6.77815	1	NA	2.18962	996	2	35.94	65	0.28048	9.23529	1	0.0308392	-1	33.43	30.62	19.48	16.47	11.46	9.25	6.33	6.43	8.54	10.75	6.33	5.03	7.44	6.33	3.72	1.91	6.03	4.22	3.12	3.12	1
74	MSTRG.12289	3	123.77	175.713	12	0.5	5.08806	3740	5	38.45	88	0.29343	10.7061	1	0.0672208	-1	31.2	30.35	17.91	20.53	10.16	9.28	5	6.77	9.92	9.01	5.4	6.02	4.97	5.48	4.17	3.26	6.15	6.58	3.32	4.49	1
75	MSTRG.12291	3	93.385	1803.8	9	0.41905	3.76106	5098	5	40.86	90	0.29818	5.10919	1	0.188811	-1	31.46	27.68	19.99	20.87	10.32	7.83	6.28	7.04	6.87	9.3	5.49	6	6.87	5.93	4.38	2.83	7.42	4.63	3.85	4.98	1
76	MSTRG.12296	2	172.093	6.01314	2	0.54948	7.04625	6209	4	42.36	366	0.3556	7.26239	1	0.999997	1	28.49	29.15	20.89	21.47	7.96	7.02	5.82	7.68	5.57	9.31	7.35	6.93	6.8	7.33	4.11	2.66	8.17	5.49	3.61	4.2	1
77	MSTRG.12302	10	185.065	6.44463	4	0.600979	7.02128	3522	1	42.59	164	0.39015	10.7294	-1	0.212648	-1	31.23	26.18	22.26	20.33	11.64	6.33	5.51	7.75	5.2	8.18	6.28	6.53	6.9	7.75	6.45	1.14	7.5	3.89	4.03	4.91	1
78	MSTRG.12304	2	161.57	9.33814	3	0.600337	7.59525	4738	4	41.49	251	0.32256	5.72968	1	0.998876	1	29.61	28.89	21.04	20.45	9.2	7.3	5.09	8.02	5.3	10.43	7.07	6.1	6.86	6.88	5.02	2.26	8.25	4.26	3.86	4.07	1
79	MSTRG.12312	5	87.07	5377.67	6	0.2956	5.94079	5768	3	40.33	136	0.26731	8.9201	1	0.20477	-1	33.08	26.6	21.2	19.12	11.96	7.75	6.38	6.99	7.21	7.66	6.55	5.17	6.97	6.45	4.54	3.23	6.94	4.72	3.73	3.75	1
80	MSTRG.12315	2	174.495	35.5838	4	0.48045	8.16874	5301	1	43.37	173	0.34566	9.2984	1	0.801701	1	28.24	28.39	22.6	20.77	7.74	6.87	6.32	7.32	5.42	8.98	7.85	6.13	7.66	7.15	4.51	3.28	7.43	5.38	3.92	4.04	1
81	MSTRG.12321	6	93.9	43.6114	10	0.35	3.20755	1673	1	36.16	45	0.33448	4.78046	1	0.0226388	-1	29.11	34.73	14.58	21.58	9.87	9.33	4.07	5.86	8.37	13.82	4.9	7.6	3.35	4.19	3.35	3.71	7.54	7.42	2.27	4.37	0
82	MSTRG.12326	5	156.477	2.65125	3	0.775	NA	3176	4	38.82	96	0.30846	6.98505	1	0.113015	-1	34.98	26.2	20.94	17.88	12.03	7.31	8.54	7.12	6.33	7.78	6.71	5.39	8.69	7.02	3.18	2.02	7.94	4.06	2.52	3.37	1
83	MSTRG.12334	5	174.06	3.36869	3	0.52	NA	4541	4	39.59	178	0.30895	4.67914	1	0.973143	1	27.24	33.16	17.77	21.82	7.18	8.37	4.8	6.87	6.61	12.14	6.43	8	6.3	6.17	2.91	2.4	7.16	6.48	3.63	4.56	1
84	MSTRG.12362	3	97.21	94.321	4	0.33115	6.09397	2984	1	38.57	161	0.34188	5.64899	1	0.91995	1	26.11	35.32	16.45	22.12	8.58	7.68	3.79	6.07	6.03	13.71	7.24	8.35	4.36	6.81	2.35	2.92	7.11	7.14	3.08	4.79	0
85	MSTRG.12364	1	70.81	1.68158	1	NA	NA	1039	1	37.63	44	0.32388	7.7547	1	0.0114446	-1	30.9	31.47	17.61	20.02	10.02	9.63	4.05	7.23	7.13	10.69	6.84	6.84	6.94	6.36	2.79	1.45	6.74	4.82	3.95	4.53	1
86	MSTRG.12379	2	106.19	8.04284	1	0.4	5.6073	1663	1	47.14	235	0.46383	8.61896	1	0.99975	1	22.49	30.37	24.53	22.61	6.68	5.6	4.75	5.42	2.71	8	9.87	9.81	6.08	10.41	4.93	3.13	7.04	6.38	4.99	4.21	1
87	MSTRG.12380	2	137.605	47.7662	3	NA	4.58399	1599	1	31.46	67	0.35398	10.1569	1	0.052251	-1	32.46	36.09	15.57	15.88	10.58	12.89	4.63	4.38	9.7	13.83	5.76	6.76	6.13	4.69	2.82	1.94	6.01	4.69	2.38	2.82	1
88	MSTRG.12381	1	163.18	0	1	NA	NA	1561	1	31.39	67	0.35398	10.1569	1	0.052251	-1	32.35	36.26	15.76	15.63	10.64	12.88	4.68	4.1	9.81	13.91	5.9	6.67	6.22	4.81	2.76	1.99	5.71	4.62	2.44	2.88	0
89	MSTRG.12383	2	75.27	3.82861	1	NA	NA	1067	0	35.43	27	0.36448	6.69183	1	0.00521192	-1	35.15	29.43	16.78	18.65	13.41	8.63	5.35	7.79	7.04	10.6	6.57	5.16	6.19	5.35	2.81	2.44	8.54	4.88	2.06	3.19	1
90	MSTRG.12394	2	89.17	12.3161	1	NA	NA	1014	3	32.74	43	0.31691	11.6699	1	0.0229327	-1	39.55	27.71	16.07	16.67	16.68	10.66	4.84	7.31	7.01	9.28	6.22	5.23	7.01	4.74	2.17	2.17	8.88	3.06	2.76	1.97	1
91	MSTRG.12404	2	87.14	0.09841	1	NA	NA	681	1	45.96	100	0.42861	7.62018	1	0.407308	-1	28.34	25.7	19.09	26.87	8.82	7.21	5.29	6.91	4.26	3.24	7.35	10.88	5	7.21	2.79	4.12	10.29	7.94	3.68	5	0
92	MSTRG.12416	3	138.5	3.35753	2	0.425933	8.28947	2253	1	42.74	651	0.42602	9.31097	-1	0.964693	1	28.41	28.85	22.15	20.59	9.77	7.46	4.88	6.31	4.75	8.61	8.57	6.88	6.35	9.06	4.57	2.18	7.55	3.73	4.13	5.2	1
93	MSTRG.12429	4	140.155	43.4636	8	0.373013	6.5391	4907	1	40.29	94	0.41579	10.3738	1	0.305861	-1	33.52	26.19	18.59	21.7	10.95	7.83	5.65	9.11	6.07	7.75	5.54	6.81	7.64	5.4	3.85	1.69	8.87	5.22	3.53	4.1	1
94	MSTRG.12434	4	71.345	45.7355	3	0.8462	7.57807	1430	0	43.29	65	0.35539	10.3582	1	0.0500744	-1	33.64	23.08	18.18	25.1	11.9	7.14	5.04	9.59	5.25	7.14	5.46	5.18	6.51	4.41	3.64	3.64	10.01	4.34	4.06	6.72	1
95	MSTRG.12438	6	79.4	1248.03	2	0.525433	6.49226	37635	13	35.58	245	0.2831	6.15289	1	0.992614	1	31.94	32.48	17.74	17.84	11.5	9.62	5.17	5.65	8.1	11.82	6.22	6.34	6.3	5.61	3.47	2.36	6.04	5.43	2.88	3.48	0
96	MSTRG.12472	4	96.29	1.27266	1	NA	NA	936	1	37.82	29	0.30544	11.0086	1	0.0158024	-1	23.61	38.57	11.97	25.85	5.99	8.45	2.46	6.63	6.74	16.47	5.56	9.84	2.99	4.17	1.28	3.53	7.91	9.41	2.67	5.88	0
97	MSTRG.12525	2	106.825	2.01185	1	0.125	8.55568	1077	0	38.25	41	0.27472	8.12262	-1	0.15951	-1	39.09	22.66	22.28	15.97	18.03	6.32	8.18	6.51	5.76	7.53	5.95	3.44	7.62	5.86	5.02	3.81	7.71	2.88	3.16	2.23	0
98	MSTRG.12568	18	195.775	9.92049	5	0.258737	8.12719	5058	1	41.99	57	0.31673	7.83746	1	0.0201627	-1	26.75	31.26	20.17	21.83	7.16	6.64	5.3	7.65	5.24	10.12	6.82	9.08	6.98	7.81	4.15	1.21	7.38	6.68	3.88	3.9	1
99	MSTRG.12578	3	150.627	5.80152	8	NA	NA	1266	0	34.76	42	0.33096	4.30768	1	0.0244215	-1	38.07	27.17	21.17	13.59	15.34	10.36	6.96	5.38	7.98	8.22	7.04	3.95	9.17	5.22	4.35	2.45	5.61	3.4	2.85	1.74	0
100	MSTRG.12616	2	66.355	36.2977	1	NA	5.4866	885	0	36.72	54	0.32407	11.6523	1	0.0302344	-1	40.9	22.37	17.51	19.21	19.34	6.9	6	8.6	6.22	7.69	4.86	3.62	6.45	4.64	4.07	2.38	8.94	3.17	2.6	4.52	0
101	MSTRG.12646	13	157.82	40.9321	3	0.4907	6.86878	5314	2	33.35	146	0.29801	6.15021	1	0.644751	1	33.82	32.84	14.06	19.29	13.14	8.88	4.25	7.53	7.7	14.02	4.99	6.14	5.55	4.46	2.24	1.81	7.43	5.46	2.58	3.82	1
102	MSTRG.12652	3	64.83	22.3231	2	0.2	5.05474	1118	1	40.7	80	0.42608	8.28314	1	0.169898	-1	26.83	32.47	20.3	20.39	8.68	7.25	5.28	5.55	7.79	11.28	7.16	6.27	5.28	7.79	4.03	3.22	5.1	6.18	3.76	5.37	1
103	MSTRG.12653	10	71.93	351.481	3	0.5788	8.17324	6981	2	38.56	150	0.30066	9.6618	1	0.346493	-1	31.86	29.58	21.77	16.79	11.48	8.51	6.17	5.7	6.23	10.01	7.99	5.33	8.07	6.33	4.7	2.68	6.07	4.73	2.91	3.08	0
104	MSTRG.12654	7	136.97	40.9323	2	0.5714	6.03448	7935	1	34.42	72	0.28411	6.49445	1	0.0485504	-1	28.15	37.43	16.26	18.16	8.99	10.05	4.07	5.05	8.81	14.65	6.84	7.12	5	6.29	2.46	2.51	5.36	6.45	2.87	3.48	0
105	MSTRG.12725	2	70.68	8.40385	2	NA	NA	787	2	33.67	42	0.33073	10.015	1	0.0178184	-1	27.06	39.26	18.17	15.5	8.65	10.43	3.05	4.83	8.02	17.56	8.27	5.47	4.33	6.87	3.82	3.18	6.11	4.45	2.93	2.04	1
106	MSTRG.13130	2	76.34	11.4495	1	NA	5.26559	614	0	34.04	38	0.42582	10.3323	1	0.0314992	-1	29.97	35.99	19.54	14.5	11.42	8.81	5.71	4.08	7.99	15.17	6.53	6.2	6.36	5.87	4.89	2.45	4.08	6.2	2.45	1.79	0
107	MSTRG.1321	3	80.445	16.8388	5	0.499833	8.69806	992	0	39.52	73	0.36027	10.5168	1	0.0709366	-1	35.89	24.6	20.26	19.25	12.92	8.98	6.96	7.06	5.85	6.16	6.36	6.26	10.19	5.15	3.53	1.41	6.86	4.34	3.43	4.54	0
108	MSTRG.13722	3	92.095	1.32629	1	0.5	NA	1895	2	32.14	40	0.23373	9.80939	1	0.0344769	-1	36.04	31.82	16.52	15.62	15.52	8.18	6.39	5.97	8.5	13.04	4.8	5.44	5.81	5.91	2.59	2.22	6.18	4.7	2.75	2.01	0
109	MSTRG.13746	2	45.7925	1.14894	3	NA	NA	1634	2	37.03	86	0.33761	9.16669	1	0.0834974	-1	36.72	26.25	16.16	20.87	13.23	9.74	5.57	8.14	7.23	8.08	5.02	5.94	7.41	3.74	2.69	2.33	8.88	4.65	2.88	4.47	0
110	MSTRG.13792	2	74.425	2.06616	2	NA	NA	755	0	31.79	33	0.32456	4.65582	-1	0.0236862	-1	38.54	29.67	14.17	17.62	17.11	8.89	4.38	8.09	7.69	10.61	4.77	6.63	6.1	4.38	2.25	1.46	7.56	5.84	2.79	1.46	0
111	MSTRG.13833	5	128.13	3.10499	4	NA	NA	2083	1	39.32	65	0.36672	6.70441	1	0.043395	-1	29.14	31.54	18.43	20.88	8.93	9.22	4.51	6.48	6.1	11.24	7.4	6.77	6.48	5.76	3.36	2.83	7.64	5.33	3.17	4.76	0
112	MSTRG.13856	2	91.57	20.5132	1	NA	NA	547	0	36.56	39	0.33553	6.47113	1	0.0093226	-1	29.62	33.82	17.73	18.83	8.79	10.07	4.76	6.04	7.33	11.9	6.41	8.24	6.41	6.78	3.11	1.47	6.96	5.13	3.48	3.11	0
113	MSTRG.13857	2	88.07	69.6181	3	0.122	5.54581	1001	0	40.06	39	0.34314	6.47113	1	0.00948629	-1	30.37	29.57	19.98	20.08	9.4	8.7	5.7	6.6	6.5	9.6	6.7	6.7	7.5	5.7	4.1	2.7	7	5.6	3.5	4	1
114	MSTRG.13860	2	84.32	3.38769	1	NA	NA	972	3	34.57	50	0.35631	9.82001	1	0.0257378	-1	37.96	27.47	20.16	14.4	14.52	10.4	7.72	5.25	6.49	8.24	7.72	5.05	10.71	4.22	2.88	2.37	6.28	4.53	1.85	1.75	1
115	MSTRG.14188	1	166.365	0	1	NA	NA	423	0	43.03	31	0.34298	9.51996	1	0.010348	-1	26.71	30.26	27.19	15.84	9.72	4.98	6.4	5.45	4.98	10.9	8.77	5.69	7.11	9.95	8.53	1.66	4.98	4.5	3.32	3.08	0
116	MSTRG.14217	2	66.975	2.33646	1	NA	NA	1043	2	34.61	41	0.36208	4.90277	1	0.0193502	-1	26.46	38.93	13.61	21	8.25	9.79	3.74	4.7	6.43	15.16	5.95	11.32	4.61	5.47	1.92	1.63	7.2	8.54	2.02	3.26	0
117	MSTRG.14236	3	156.685	17.6242	6	0.1	8.26693	2806	1	34.53	57	0.35843	9.30157	1	0.0313742	-1	35.71	29.76	19.49	15.04	14.8	8.88	6.35	5.67	6.95	11.02	6.42	5.38	8.59	5.7	3.42	1.78	5.38	4.14	3.32	2.21	1
118	MSTRG.14239	5	122.515	2.67372	5	NA	NA	2948	0	32.5	40	0.30489	4.25092	1	0.0258077	-1	39.28	28.22	17.81	14.69	16.36	9.5	6.82	6.62	8.14	9.64	6.11	4.31	8.01	5.09	2.95	1.76	6.79	3.97	1.93	2	0
119	MSTRG.14262	7	213.238	30.6684	8	0.541667	8.5608	3245	1	41.45	102	0.31389	11.551	1	0.0955269	-1	22.5	36.06	20.55	20.89	7.09	5.98	3.88	5.52	5.06	12.45	9.16	9.4	4.75	9.86	3.48	2.47	5.61	7.77	4.04	3.48	1
120	MSTRG.14306	3	63.0925	14.9293	1	0.49375	NA	2862	0	38.61	96	0.36915	6.58063	1	0.21984	-1	36.97	24.42	19.5	19.11	13.81	6.85	7.1	9.23	6.92	6.96	5.77	4.79	7.55	6.68	3.64	1.64	8.7	3.95	2.97	3.46	0
121	MSTRG.14389	4	74.86	1.28463	1	0	NA	935	1	38.93	26	0.24526	7.99884	1	0.0133272	-1	38.07	22.99	26.52	12.41	16.38	7.82	9.85	3.96	6	5.67	8.14	3.21	10.06	6.85	5.89	3.75	5.67	2.57	2.68	1.5	0
122	MSTRG.14400	2	57.02	5.78561	3	0.586386	6.67153	2515	2	49.54	112	0.34165	10.2868	1	0.210745	-1	28.67	21.79	20.56	28.99	8.07	7.48	5.69	7.44	5.49	4.18	6.64	5.49	5.09	4.49	4.3	6.64	10.02	5.61	3.94	9.43	1
123	MSTRG.14411	5	154.825	14.7518	5	NA	NA	7765	5	37.13	232	0.26107	8.71124	1	0.806936	1	33.82	29.05	16.2	20.93	12.56	8.26	4.93	8.08	6.74	10.34	5.78	6.2	5.96	5.28	2.6	2.36	8.57	5.16	2.89	4.3	0
124	MSTRG.14430	2	95.295	25.3582	4	0.433333	4.98113	1150	2	43.39	67	0.3303	11.4902	1	0.0445623	-1	24.61	32	26.09	17.3	8.09	6.01	5.74	4.7	5.57	11.75	10.7	4	6.35	8.27	6.7	4.79	4.61	6.01	2.87	3.83	1
125	MSTRG.14431	4	81.04	721.173	4	NA	5.92	1961	2	40.9	67	0.26383	11.4902	1	0.0485307	-1	35.14	23.97	25.55	15.35	13.78	7.3	9.39	4.64	8.37	5.97	6.43	3.21	7.81	6.58	6.63	4.54	5.2	4.08	3.11	2.96	1
126	MSTRG.14432	5	159.185	44.1888	4	0.520537	7.73077	2592	1	39.2	95	0.2887	10.0535	1	0.0772342	-1	25.77	35.03	18.67	20.52	8.26	7.18	4.59	5.71	6.02	13.05	6.95	9.03	5.44	7.64	3.36	2.24	6.06	7.14	3.78	3.55	1
127	MSTRG.14438	4	49.71	100.946	10	NA	5.85261	3796	4	33.06	61	0.26498	4.02765	1	0.17987	-1	32.74	34.19	15.17	17.89	13.23	9.17	4.69	5.64	7.77	13.04	5.98	7.4	5.32	5.98	2.4	1.48	6.43	6.01	2.11	3.35	1
128	MSTRG.14444	2	58.56	11.4107	1	0.2	7.1547	2903	6	31.9	85	0.31418	7.57489	1	0.0662078	-1	32.66	35.45	14.43	17.46	14.23	9.55	3.72	5.17	8.89	15.64	4.96	5.93	4.79	4.72	3.2	1.72	4.76	5.51	2.55	4.65	1
129	MSTRG.14456	4	148.715	10.9911	2	0.465163	5.94602	1502	1	36.95	76	0.30268	8.43866	1	0.0423101	-1	27.1	35.95	16.18	20.77	8.59	8.79	4.66	5	8.06	13.52	6.26	8.13	5.4	5.06	2.66	3.06	5.06	8.53	2.6	4.6	1
130	MSTRG.14459	2	106.27	3.54409	1	NA	NA	1064	1	41.92	80	0.34671	4.37091	1	0.204555	-1	26.69	31.39	19.08	22.84	7.81	8.18	4.61	6.02	5.93	11.38	6.68	7.43	5.55	4.8	5.17	3.57	7.43	7.06	2.63	5.74	1
131	MSTRG.14461	4	105.955	14.3424	3	0.416075	2.22222	13103	3	35.18	440	0.29204	7.99188	1	0.99998	1	32.73	32.09	16.93	18.26	11.87	9.11	5.66	6.08	7.95	11.27	6.3	6.58	6.13	6.24	2.62	1.95	6.79	5.48	2.34	3.65	0
132	MSTRG.14463	2	161.46	5.31835	1	NA	NA	1126	1	39.88	12	0.30405	10.0009	1	0.00696085	-1	32.24	27.89	25.04	14.83	10.67	7.2	7.82	6.58	6.76	8.36	9.16	3.64	9.69	8.53	4.8	2.04	5.07	3.82	3.29	2.58	1
133	MSTRG.14466	2	145.93	0	1	NA	NA	977	2	40.33	57	0.41115	10.3004	1	0.0633257	-1	38.08	21.6	22.11	18.22	13.52	6.56	8.91	9.12	4.71	6.45	5.43	4.92	12.81	5.02	3.18	1.13	7.07	3.59	4.61	2.97	1
134	MSTRG.14485	2	97.53	5.08317	1	0.341729	8.19018	6585	3	39.54	201	0.3	5.20844	1	0.98448	1	30.17	30.28	18.36	21.18	10.92	8.2	4.22	6.83	5.8	10.83	6.97	6.68	5.74	5.73	4.09	2.79	7.72	5.53	3.08	4.86	1
135	MSTRG.14489	2	75.04	179.602	5	0.57755	4.25791	917	0	36.97	48	0.34717	5.59637	1	0.0197243	-1	36.86	26.17	18.87	18.1	12.45	10.26	7.1	7.1	8.84	7.97	5.13	4.15	6.99	5.46	3.17	3.28	8.52	2.51	3.49	3.6	0
136	MSTRG.14514	2	78.64	63.1764	1	NA	6.8254	1165	0	36.65	45	0.32528	4.38104	1	0.0279081	-1	39.74	23.61	19.83	16.82	17.96	7.22	6.79	7.82	6.1	7.65	5.67	4.12	8.08	4.9	4.12	2.75	7.65	3.78	3.26	2.15	0
137	MSTRG.14532	3	74.33	8.8595	3	0.75	7.93395	2633	2	36.65	53	0.28555	8.81732	1	0.0196038	-1	25.64	37.71	16.9	19.75	7.67	8.43	3.72	5.78	6.76	15.92	7.26	7.79	4.98	6.5	2.96	2.47	6.23	6.84	2.96	3.72	1
138	MSTRG.14580	2	83.5	2.63209	1	0.4	9.24419	1619	1	38.42	63	0.32732	4.1391	1	0.0871455	-1	24.58	37	14.82	23.59	5.87	9.15	3.58	5.93	7.79	13.78	5.01	10.44	3.89	5.93	2.53	2.47	7.05	8.16	3.71	4.7	1
139	MSTRG.14581	2	98.175	10.4543	2	0.50024	8.37295	5241	3	45.72	589	0.38008	6.00555	1	1	1	26.31	27.97	23.41	22.3	6.41	6.3	6.24	7.35	4.9	9.06	7.73	6.28	6.93	7.31	5.19	3.99	8.07	5.29	4.26	4.69	1
140	MSTRG.14583	6	86.4625	8.82039	3	0.6667	7.99742	1849	1	33.21	64	0.31766	8.93085	1	0.0301767	-1	37.26	29.53	17.58	15.63	14.99	9.15	6.11	7.03	7.68	10.82	6.33	4.71	7.25	5.74	3.14	1.46	7.36	3.84	2	2.38	1
141	MSTRG.14585	5	121.34	11.3696	3	0.4	5.83969	1531	0	34.68	58	0.32464	10.6901	1	0.0338062	-1	27.17	38.15	17.11	17.57	8.37	9.02	4.12	5.69	7.91	15.29	7.58	7.32	4.84	8.04	2.35	1.9	6.08	5.75	3.07	2.68	1
142	MSTRG.14586	4	82.83	0.820647	1	NA	NA	984	0	44.21	54	0.35042	11.1155	1	0.0340987	-1	31.81	23.98	25.91	18.29	11.39	7.02	7.73	5.7	5.8	6.51	7.93	3.66	9.36	6.1	5.7	4.78	5.29	4.37	4.48	4.17	0
143	MSTRG.14591	1	97.97	0	1	NA	NA	2841	1	48.61	91	0.40561	9.29828	1	0.231677	-1	26.12	25.27	25.48	23.13	8.42	5.92	4.4	7.39	4.3	7.22	9.08	4.68	5.77	7.92	5.99	5.77	7.64	4.23	5.99	5.28	1
144	MSTRG.14592	3	125.945	18.9318	4	0.607717	7.09929	96853	52	39.98	367	0.29367	8.52069	1	0.999383	1	29.59	30.43	19.17	20.81	9.3	8.22	5.13	6.95	6.76	10.35	6.54	6.79	6.28	6.29	4.04	2.56	7.26	5.57	3.47	4.51	1
145	MSTRG.14594	2	129.68	3.89396	1	0.4	NA	1683	2	41.83	90	0.42731	6.03412	-1	0.0409471	-1	32.56	25.61	22.7	19.13	10.76	6.66	7.61	7.55	4.88	8.2	6	6.54	10.46	6.24	5.23	0.71	6.42	4.52	3.86	4.34	1
146	MSTRG.14595	5	98.15	2301.33	15	0.1707	6.07361	8142	5	39.31	110	0.27943	4.22333	1	0.604837	1	30.02	30.67	14.33	24.98	9.27	7.79	4	8.94	7.76	11.13	4.51	7.27	4.46	4.03	2.76	3.08	8.52	7.73	3.06	5.67	1
147	MSTRG.14598	2	94.37	4.69351	1	0.5	5.8277	666	3	34.98	24	0.32732	6.52094	1	0.00428754	-1	34.53	30.48	19.22	15.77	13.68	9.02	6.47	5.41	7.52	11.28	7.82	3.91	6.17	7.07	3.16	2.86	7.22	3.01	1.8	3.61	1
148	MSTRG.14599	3	143.7	29.4061	5	0.225	7.34759	4681	2	40.85	271	0.32642	5.54327	1	0.999726	1	29.5	29.65	19.63	21.21	9.1	7.71	4.89	7.78	6	10.47	6.58	6.6	6.54	6.54	4.47	2.09	7.86	4.94	3.7	4.72	1
149	MSTRG.14600	7	171.097	4.15234	2	0.6667	9.18091	1954	3	35.98	83	0.38081	9.20587	1	0.120704	-1	32.29	31.73	14.07	21.9	11.11	8.7	4.35	8.09	7.48	11.32	4.4	8.55	5.58	5.17	2.25	1.08	8.14	6.55	3.07	4.15	1
150	MSTRG.14603	3	117.57	1257.97	13	0.6016	5.17749	5127	3	44.84	150	0.28366	7.73236	1	0.425898	-1	27.83	27.33	23.93	20.91	7.92	7.65	6.5	5.77	6.91	8.33	6.67	5.4	6.98	6.09	5.85	5.01	6.03	5.27	4.92	4.7	1
151	MSTRG.14605	1	55.425	0	1	NA	3.83295	873	2	48.91	24	0.39934	11.4196	1	0.0146202	-1	25.89	25.2	27.72	21.19	7.45	6.88	6.65	4.82	5.5	6.77	8.03	4.93	7.11	6.88	7.22	6.54	5.85	4.7	5.73	4.93	0
152	MSTRG.14606	4	209.06	15.2351	3	0.51597	7.44613	2626	2	39.64	99	0.39139	4.82111	1	0.541188	1	29.86	30.5	19.15	20.49	9.83	8.11	4.95	6.93	6.32	9.9	7.01	7.28	6.13	6.59	4.19	2.25	7.58	5.9	3.01	4	1
153	MSTRG.14608	3	113.985	26.6959	3	0.375	6.20438	1016	1	37.2	91	0.41366	6.4986	1	0.286661	-1	26.48	36.32	18.11	19.09	8.67	8.57	4.73	4.43	4.83	16.16	7.09	8.28	5.52	6.21	3.65	2.76	7.49	5.42	2.56	3.65	1
154	MSTRG.14620	4	72.07	5.14595	2	0.725	NA	2205	1	36.15	113	0.38387	10.1408	1	0.370675	-1	28.34	35.51	16.96	19.18	9.94	9.57	3.63	5.17	6.81	13.29	7.94	7.49	4.58	6.53	3.13	2.72	6.99	6.13	2.27	3.81	1
155	MSTRG.14630	2	89.2	5.58507	2	0.166675	8.79944	788	2	39.09	31	0.37331	10.1824	1	0.0139854	-1	29.95	30.96	20.81	18.27	8.77	8.13	6.48	6.61	7.62	10.8	7.37	5.08	6.23	6.86	4.45	3.3	7.37	5.21	2.41	3.3	1
156	MSTRG.14631	3	106.54	1.85365	2	0	NA	3218	3	36.08	329	0.41795	5.20782	1	1	1	30.83	33.1	14.92	21.16	9.95	9.85	4.07	6.96	6.78	11.28	6.19	8.83	6.37	5.69	1.24	1.62	7.74	6.28	3.42	3.73	1
157	MSTRG.14635	2	83.225	4.0583	2	NA	NA	654	2	34.71	40	0.25312	11.4831	1	0.0388805	-1	25.69	39.6	18.35	16.36	7.96	11.33	3.22	3.22	8.88	17.15	8.27	5.21	4.59	5.36	3.37	5.05	4.29	5.67	3.52	2.91	1
158	MSTRG.14636	2	74.275	1.92558	2	0.875	NA	695	1	37.99	131	0.40151	4.81781	1	0.919021	1	29.21	32.81	12.09	25.9	9.65	8.65	3.75	7.06	6.48	10.95	4.47	10.95	3.89	4.47	1.87	1.87	9.22	8.79	2.02	5.91	0
159	MSTRG.14637	4	135.45	6.65348	2	0.47915	9.06957	2176	1	49.91	81	0.41442	9.12823	1	0.167487	-1	26.24	23.85	27.07	22.84	8.18	4.74	6.02	7.31	3.63	6.39	7.95	5.89	7.03	8.23	6.94	4.87	7.4	4.51	6.16	4.74	1
160	MSTRG.14639	2	70.0225	26.402	6	0.355612	7.78673	30339	9	42.21	202	0.36864	8.84393	1	0.971829	1	28.87	28.92	20.27	21.94	9.7	7.79	4.88	6.5	5.99	8.72	6.89	7.32	6.23	6.45	4.52	3.07	6.95	5.96	3.98	5.05	1
161	MSTRG.14640	2	58.6925	0	2	NA	NA	30179	9	42.26	202	0.36864	8.84393	1	0.971829	1	28.76	28.98	20.26	22	9.62	7.79	4.84	6.51	5.99	8.75	6.89	7.34	6.2	6.46	4.53	3.07	6.95	5.98	4	5.08	1
162	MSTRG.14642	2	89.065	40.0421	1	0.3433	3.01552	4268	4	44.12	111	0.31345	10.2888	1	0.145318	-1	29.62	26.27	25	19.12	9.75	7.48	6.87	5.53	8.13	6.4	7.48	4.27	6.87	7.41	6.59	4.15	4.87	4.99	4.08	5.16	1
163	MSTRG.14646	2	61.97	0	1	NA	NA	809	1	36.59	33	0.41405	7.99908	1	0.0111212	-1	35.23	28.18	20.77	15.82	12	9.16	6.93	7.18	7.92	7.92	8.66	3.71	7.8	8.17	2.85	1.98	7.43	2.97	2.35	2.97	0
164	MSTRG.14648	2	129.84	5.19864	2	0.498825	6.91138	1597	3	46.71	181	0.3375	9.31927	1	0.816802	1	25.74	27.55	22.17	24.55	7.39	6.7	4.32	7.33	3.45	8.21	7.96	7.89	7.14	6.83	4.57	3.63	7.77	5.76	5.33	5.7	1
165	MSTRG.14649	2	192.34	41.0793	2	0.488833	6.10778	1502	2	42.74	53	0.38013	5.50934	1	0.0354498	-1	28.1	29.16	18.11	24.63	8.66	7	4.4	8.06	5.73	7.53	7.86	7.99	5.46	6.46	2.86	3.33	8.26	8.19	3	5.2	1
166	MSTRG.14653	5	118.275	1.42658	7	NA	NA	1492	0	35.12	52	0.28472	10.6974	-1	0.176899	-1	38.2	26.68	18.77	16.35	15.22	9.66	6.37	6.91	6.51	8.85	5.9	5.43	8.58	4.76	2.95	2.48	7.91	3.35	3.55	1.54	0
167	MSTRG.14654	2	172.88	0	1	NA	NA	1496	0	35.43	62	0.31342	10.386	1	0.0353589	-1	37.97	26.6	18.98	16.44	14.98	9.63	6.42	6.96	6.56	8.56	6.02	5.42	8.63	4.82	3.01	2.54	7.83	3.55	3.55	1.54	0
168	MSTRG.14659	2	84.295	0	1	NA	NA	36552	10	38.86	108	0.28334	6.62787	1	0.186338	-1	29.28	31.86	20.46	18.4	9.8	7.65	5.74	6.1	6.75	10.81	7.79	6.5	7.04	8.06	3.32	2.04	5.69	5.34	3.6	3.76	0
169	MSTRG.14660	2	156.062	44.173	5	0.44565	7.72135	5296	1	45.69	94	0.29776	10.0532	1	0.0795167	-1	28.13	26.17	21.88	23.81	9.07	6.53	5.08	7.46	4.99	6.21	7.91	7.06	6.16	7.31	4.36	4.04	7.91	6.12	4.53	5.25	1
170	MSTRG.14666	11	219.22	8.58589	5	0.6667	8.68911	2791	2	32.86	80	0.35026	9.11432	1	0.0747281	-1	29.09	38.05	14.12	18.74	10.11	9.71	3.58	5.66	8.21	15.27	6.09	8.49	4.37	6.38	1.72	1.65	6.38	6.7	2.72	2.94	1
171	MSTRG.14675	2	160.88	14.4842	1	0.63055	NA	3650	1	41.84	80	0.3068	6.21429	1	0.0717579	-1	24.85	33.32	20.47	21.37	7.37	6.85	3.97	6.63	4.41	11.56	8.8	8.55	6.52	8.74	4	1.21	6.55	6.14	3.7	4.99	0
172	MSTRG.14678	5	120.218	10.9125	9	NA	NA	2087	2	32.87	50	0.34193	6.71442	1	0.0163262	-1	29.04	38.09	16.05	16.82	9.88	8.77	4.31	6.04	8.49	15.48	7.72	6.42	4.6	7.57	2.3	1.58	6.09	6.28	1.73	2.73	0
173	MSTRG.14680	6	178.712	10.0313	5	0.5714	8.98834	3488	3	42.17	112	0.26413	11.3194	1	0.0952655	-1	24.68	33.14	22.28	19.9	6.85	7	4.82	5.99	5.08	10.78	9.98	7.31	6.45	9	3.7	3.13	6.31	6.37	3.76	3.47	1
174	MSTRG.14682	2	47.535	33.0643	3	0.518175	4.00871	1129	1	38.8	138	0.39606	5.22406	1	0.922415	1	25.42	35.78	19.31	19.49	8.16	7.36	4.96	4.88	5.5	15.43	7.45	7.45	4.34	7	4.34	3.63	7.45	5.94	2.57	3.55	1
175	MSTRG.14683	2	141.4	1.49155	1	NA	NA	577	1	37.44	103	0.34088	10.3498	-1	0.169762	-1	32.06	30.5	27.56	9.88	13.37	8.85	7.29	2.6	5.38	10.76	11.63	2.6	10.07	7.64	7.12	2.78	3.3	3.12	1.56	1.91	0
176	MSTRG.14685	1	101.63	2.32841	1	0.361117	6.9765	2850	2	39.19	76	0.31027	8.211	1	0.0435312	-1	32	28.81	20.11	19.09	12	7.97	5.23	6.81	6.6	8.99	7.02	6.18	7.02	7.34	4.07	1.68	6.35	4.53	3.79	4.42	1
177	MSTRG.14688	2	110.435	3.02482	1	NA	NA	3244	2	32.77	115	0.30736	10.6622	1	0.144902	-1	30.52	36.71	17.76	15.01	11.1	10.73	4.04	4.66	7.89	14.65	8.6	5.55	6.2	6.38	3.18	2	5.33	4.96	1.91	2.81	1
178	MSTRG.14689	3	130.46	2.40627	2	0.45	NA	1052	1	39.07	56	0.47363	4.4339	1	0.113443	-1	33.46	27.47	15.4	23.67	11.42	7.42	6.28	8.28	7.14	8.37	3.81	8.18	6.18	5.04	2.66	1.52	8.75	6.57	2.66	5.71	1
179	MSTRG.14691	3	115.602	4.97092	2	NA	7.57256	33763	23	40.05	402	0.2895	5.38617	1	0.999999	1	31.09	28.87	20.07	19.98	9.91	7.95	5.93	7.3	6.55	9.13	6.54	6.64	7.13	6.64	4.21	2.09	7.49	5.14	3.39	3.95	0
180	MSTRG.14692	5	220.31	12.1094	6	0.4	8.58588	4888	8	41.37	117	0.35996	9.05927	1	0.330261	-1	30.67	27.97	20.32	21.05	10.21	7.76	5.38	7.33	6.32	7.2	7.53	6.92	6.83	7.14	3.74	2.6	7.31	5.85	3.66	4.22	1
181	MSTRG.14696	6	207.04	6.74555	2	NA	NA	3314	2	38.47	62	0.27527	10.2073	1	0.0343461	-1	33.74	27.79	22.3	16.17	12.41	8.69	7.09	5.52	7.21	8.06	7.97	4.56	8.45	6.79	4.65	2.41	5.67	4.23	2.6	3.68	1
182	MSTRG.14697	2	171.725	0	1	NA	NA	1511	1	36.14	62	0.31895	10.2073	1	0.0351628	-1	34.15	29.72	19.92	16.21	13.97	8.74	5.43	6.03	7.75	9.74	7.62	4.57	6.95	6.89	4.37	1.72	5.5	4.3	2.52	3.91	0
183	MSTRG.14700	2	98.93	2.40895	2	0.8	NA	1861	1	45.57	98	0.37463	10.1336	1	0.20678	-1	30.41	24.02	20.9	24.66	10.48	6.45	5.05	8.44	4.95	5.05	6.94	7.04	6.67	6.72	4.3	3.23	8.33	5.75	4.62	5.97	1
184	MSTRG.14703	2	61	14.7789	3	0.1111	3.65042	1047	2	32.86	36	0.35997	6.52875	1	0.00856303	-1	35.91	31.23	17.96	14.9	15.11	9.46	5.35	6.02	7.93	11.09	7.17	5.07	7.55	6.21	2.68	1.43	5.35	4.4	2.77	2.39	1
185	MSTRG.14706	2	98.6	2.13469	1	NA	NA	650	0	33.23	47	0.29132	9.7309	1	0.0195753	-1	44.46	22.31	14.62	18.62	19.72	10.32	6.47	8.01	8.78	6.01	3.24	4.16	5.7	3.54	2.62	2.77	10.17	2.47	2.31	3.7	1
186	MSTRG.14711	2	135.72	48.2607	5	0.507975	6.81419	16468	5	42.99	1106	0.31793	6.63629	1	1	1	28.05	28.96	21.34	21.64	7.68	7.01	5.74	7.62	5.21	9.8	7.04	6.91	7.07	7.17	4.64	2.47	8.1	4.98	3.92	4.64	1
187	MSTRG.14713	3	89.07	66.1818	4	0.5	5.04231	3113	0	37.2	81	0.2887	6.2182	1	0.076872	-1	26.34	36.46	17.15	20.04	9.29	8.55	3.57	4.95	6.23	14.69	7.36	8.16	4.76	6.36	2.96	3.08	6.04	6.88	3.28	3.86	1
188	MSTRG.14719	5	188.35	10.5169	7	0.6667	9.03211	2917	2	43.95	88	0.34028	8.73773	1	0.0907996	-1	22.8	33.25	21.87	22.08	6.07	5.93	4.73	6.04	4.7	10.77	8.81	8.98	5.73	9.33	3.94	2.88	6.28	7.24	4.39	4.18	1
189	MSTRG.14720	3	82.93	8.62593	3	NA	NA	1025	0	31.51	18	0.3363	10.0523	1	0.0075427	-1	34.63	33.85	14.54	16.98	13.09	10.35	4.98	6.15	8.89	13.09	5.76	6.15	4.79	5.96	2.25	1.56	7.91	4.39	1.56	3.12	1
190	MSTRG.14725	3	188.29	4.73293	2	NA	NA	1718	2	35.22	58	0.31369	9.74762	1	0.0278549	-1	25.67	39.12	18.04	17.17	8.33	8.79	3.61	4.95	6.99	15.9	8.27	7.92	4.54	7.75	3.67	2.1	5.77	6.7	2.5	2.21	0
191	MSTRG.14727	3	87.8925	886.796	18	0.336083	3.03975	1541	2	37.51	39	0.34103	4.9527	1	0.0149992	-1	25.18	37.31	13.3	24.21	5.84	8.7	3.57	7.01	9.61	15.06	4.68	7.99	3.25	4.09	2.6	3.38	6.49	9.42	2.47	5.84	1
192	MSTRG.14732	4	195.36	14.6951	2	0.0694583	8.96968	3002	1	42.24	48	0.3112	10.0972	1	0.0216589	-1	34.51	23.25	21.09	21.15	11.66	6.33	7.3	9.23	5.33	6.3	6.16	5.43	8.7	5.73	3.63	3.03	8.83	4.9	4	3.43	1
193	MSTRG.14733	3	85.2	3.40811	2	0.4752	5.3128	3250	2	36.18	106	0.37508	11.0152	1	0.245897	-1	31.38	32.43	20.31	15.88	10.34	10.77	5.88	4.4	8.31	10.5	7.26	6.34	7.29	6.43	4.4	2.19	5.42	4.74	2.77	2.95	1
194	MSTRG.14734	5	91.35	9.1306	5	NA	2.40821	1510	0	34.64	82	0.28127	4.64642	1	0.20153	-1	24.64	40.73	16.42	18.21	7.62	9.15	2.65	5.17	6.69	16.77	8.48	8.81	5.17	8.02	2.19	1.06	5.17	6.83	3.11	3.11	1
195	MSTRG.14735	4	72.31	10.2455	3	0.2	7.42802	3184	5	29.49	49	0.34834	5.33746	1	0.0232313	-1	38.88	31.63	17.93	11.56	15.3	12.91	6.5	4.18	11.25	10.78	6.09	3.49	7.41	4.71	3.55	2.26	4.93	3.2	1.79	1.63	1
196	MSTRG.14738	3	56.19	5.83464	2	NA	7.30216	1039	1	42.16	71	0.33856	8.94	1	0.0455408	-1	22.43	35.42	21.85	20.31	5.39	7.9	3.37	5.68	5.68	12.33	10.12	7.32	6.07	8.86	5.39	1.54	5.3	6.36	2.89	5.78	1
197	MSTRG.14789	3	83.455	3.3419	1	NA	NA	814	1	35.01	47	0.33864	10.0876	1	0.0222498	-1	36.86	28.13	17.2	17.81	17.84	7.38	4.55	7.13	8.12	9.96	5.66	4.31	5.41	5.41	3.57	2.83	5.54	5.29	3.44	3.57	1
198	MSTRG.14800	1	74.79	2.40423	1	NA	NA	821	2	41.78	107	0.33813	6.26508	1	0.276469	-1	25.94	32.28	14.62	27.16	7.44	8.05	2.8	7.56	7.32	12.44	5.61	6.95	4.15	4.27	2.68	3.54	7.07	7.56	3.54	9.02	0
199	MSTRG.14809	2	43.75	4.87504	2	NA	NA	790	0	44.05	97	0.3354	9.72296	1	0.124016	-1	20.51	35.44	28.35	15.7	5.45	7.48	4.69	2.92	5.96	11.66	11.53	6.34	6.46	10.39	8.75	2.79	2.66	5.96	3.3	3.68	1
200	MSTRG.14812	4	150.24	1.07858	2	NA	NA	1742	1	37.08	65	0.39612	10.6464	1	0.076518	-1	31.4	31.52	19	18.08	11.43	8.44	5.23	6.26	7.18	11.26	7.12	5.97	6.78	6.15	3.68	2.41	6.03	5.63	2.99	3.45	0
201	MSTRG.14830	3	97.43	8.44687	1	0.75	6.84906	1448	1	39.57	47	0.44355	4.53876	1	0.0694213	-1	28.94	31.49	18.16	21.41	9.05	8.36	4.91	6.57	5.6	10.92	6.43	8.57	6.7	5.67	3.66	2.14	7.6	6.57	3.11	4.15	1
202	MSTRG.14839	5	86.97	3.2423	3	0.702508	8.68659	2972	1	41.45	281	0.45895	5.33038	1	0.999997	1	29.24	29.31	16.18	25.27	8.68	7.61	4.07	8.85	5.69	10.03	5.12	8.48	5.12	5.02	3.23	2.83	9.76	6.66	3.77	5.08	1
203	MSTRG.14970	2	91.59	4.74094	1	NA	NA	980	1	36.22	202	0.4031	7.66742	1	0.994005	1	26.63	37.14	19.49	16.73	7.25	8.99	5.92	4.39	8.27	13.28	7.97	7.66	6.74	8.89	2.76	1.12	4.29	6.03	2.86	3.58	1
204	MSTRG.1500	4	92.96	0.29451	1	NA	NA	1107	0	40.92	67	0.38051	4.03571	1	0.179976	-1	25.47	33.6	21.5	19.42	7.87	7.59	4.79	5.15	6.24	11.57	8.77	7.05	5.24	8.59	4.88	2.8	6.15	5.88	3.07	4.34	0
205	MSTRG.15070	2	58.86	1.68492	1	NA	NA	703	1	44.52	116	0.44346	6.69305	1	0.72656	1	25.04	30.44	29.45	15.08	8.12	6.98	6.55	3.28	4.27	8.83	12.11	5.27	9.4	9.97	6.84	3.28	3.28	4.7	3.85	3.28	1
206	MSTRG.151	2	102.71	3.14604	1	0.293886	NA	1658	0	43.24	56	0.35721	7.82782	1	0.0236529	-1	30.1	26.66	20.93	22.32	10.26	7.12	5.07	7.6	5.49	7.91	7.3	5.97	6.94	6.4	4.22	3.38	7.42	5.19	4.35	5.37	0
207	MSTRG.15112	2	74.7125	6.40235	5	NA	3.67733	907	2	33.08	52	0.34008	9.64313	1	0.0244409	-1	38.37	28.56	18.3	14.77	16.23	8.94	7.28	5.96	7.73	10.26	5.19	5.3	8.83	4.42	3.42	1.66	5.63	4.97	2.43	1.77	0
208	MSTRG.15113	1	99.23	0	1	NA	NA	880	2	33.52	52	0.34008	9.64313	1	0.0244409	-1	38.07	28.41	18.64	14.89	16.27	8.99	7.17	5.69	7.39	10.01	5.57	5.46	8.53	4.66	3.53	1.93	5.92	4.78	2.39	1.71	0
209	MSTRG.15156	5	161.433	50.7961	15	0.9565	4.83838	4499	3	32.59	75	0.26243	9.35748	1	0.0438891	-1	34.65	32.76	16.03	16.56	12.21	10.23	5.49	6.71	9.47	12.12	5.85	5.34	6.07	5.38	2.65	1.93	6.89	5.05	2.05	2.58	0
210	MSTRG.15166	3	78	1.21036	2	NA	NA	2590	3	29.65	38	0.25198	9.51263	1	0.0209458	-1	36.87	33.47	16.1	13.55	14.6	11.55	5.95	4.79	10.04	12.32	5.87	5.21	6.57	5.52	2.47	1.54	5.64	4.09	1.82	2.01	0
211	MSTRG.15562	3	66.675	15.2156	1	NA	NA	1282	3	37.29	38	0.42272	9.18512	1	0.021851	-1	32.84	29.88	20.59	16.69	12.26	8.43	6.4	5.78	6.95	9.76	7.42	5.78	7.1	7.34	3.59	2.58	6.56	4.37	3.12	2.58	1
212	MSTRG.15667	3	136.81	6.26307	2	NA	NA	1007	0	34.06	31	0.29675	11.3648	1	0.0187421	-1	31.48	34.46	14.5	19.56	11.13	9.74	3.98	6.56	6.96	13.42	6.06	8.05	4.77	5.77	1.99	1.99	8.55	5.57	2.49	2.98	1
213	MSTRG.15960	11	124.17	22.0325	2	0.5278	NA	18476	8	31.82	115	0.23373	12.0041	1	0.113523	-1	36.26	31.92	16.53	15.28	14.34	10.68	5.48	5.76	9.28	11.29	5.89	5.46	6.75	5.15	3.03	1.61	5.89	4.8	2.14	2.46	0
214	MSTRG.16102	2	104.597	0	2	NA	7.03791	986	0	35.19	54	0.42587	11.5746	1	0.0678526	-1	40.26	24.54	19.27	15.92	19.7	9.34	5.48	5.69	6.29	8.22	6.8	3.25	6.5	4.67	4.16	3.96	7.72	2.34	2.84	3.05	0
215	MSTRG.17218	3	146.95	125.128	7	0.202233	4.34182	1860	0	38.12	87	0.29077	9.06195	1	0.0598887	-1	36.13	25.75	20.27	17.85	12.75	10.54	6.24	6.56	7.26	6.51	7.26	4.73	7.26	5.54	3.87	3.6	8.88	3.17	2.85	2.96	0
216	MSTRG.17219	1	126.71	0	1	NA	NA	2140	0	38.04	87	0.31947	9.06195	1	0.0724899	-1	35.05	26.92	20.19	17.85	12.11	10.33	6.03	6.55	7.43	7.53	6.97	5	7.2	5.56	4.07	3.37	8.32	3.51	3.13	2.9	0
217	MSTRG.17478	13	118.565	20.4092	1	0.383	2.19444	12045	1	37.49	186	0.28165	6.04193	1	0.913793	1	28.07	34.44	17.29	20.2	9.33	8.64	4.23	5.87	6.64	13.12	6.93	7.75	5.19	6.5	2.86	2.73	6.91	6.18	3.26	3.85	0
218	MSTRG.17790	4	110.19	46.9958	1	0.7714	NA	6101	0	40.71	76	0.33746	8.68573	1	0.0539878	-1	30.83	28.45	20.6	20.11	10.08	8.36	5.85	6.52	6	9.26	6.62	6.57	7.05	6.13	4.1	3.33	7.7	4.69	4.03	3.69	0
219	MSTRG.17880	2	81.3575	2.97895	1	NA	6.51132	12508	2	39.21	510	0.35339	8.04083	1	1	1	28.7	32.08	18.42	20.79	9.91	8.04	4.65	6.11	5.85	11.88	7.15	7.2	5.66	6.36	3.29	3.1	7.28	5.8	3.33	4.38	0
220	MSTRG.17888	3	97.74	4.27933	1	0.64475	4.68599	1631	0	34.89	45	0.33281	6.22931	1	0.013273	-1	35.93	29.18	19.93	14.96	14.79	9.2	6.56	5.34	5.83	10.74	7.55	5.09	8.47	6.2	3.5	1.78	6.87	3.01	2.33	2.76	0
221	MSTRG.17909	6	90.5875	8.60978	8	NA	1.17744	2021	0	38.89	76	0.28716	4.56317	1	0.154347	-1	33.05	28.06	20.39	18.51	11.53	8.76	6.19	6.53	6.78	8.56	6.68	6.04	7.33	6.19	4.16	2.72	7.43	4.5	3.37	3.22	0
222	MSTRG.1845	2	70.6	1.03106	1	NA	NA	843	1	32.62	68	0.33305	7.77948	1	0.0352526	-1	31.79	35.59	15.78	16.84	11.05	10.93	4.04	5.7	8.79	14.37	5.82	6.65	6.18	5.11	3.68	0.83	5.7	5.23	2.26	3.68	0
223	MSTRG.18815	2	84.31	3.7854	1	NA	NA	760	1	36.58	52	0.43113	6.20184	1	0.0418128	-1	29.21	34.21	12.89	23.68	9.62	8.43	3.29	7.91	6.06	13.31	4.74	10.14	5.01	4.22	1.71	1.84	8.56	8.3	3.16	3.69	1
224	MSTRG.18923	2	53.62	13.3678	2	0.36905	8.79986	1781	1	39.25	512	0.49078	6.68842	-1	0.986225	1	30.94	29.81	19.37	19.88	11.01	7.3	5.51	7.08	6.01	9.27	8.43	6.12	6.57	8.15	2.7	1.97	7.3	5.11	2.75	4.72	1
225	MSTRG.19158	2	101.81	1.69053	1	NA	NA	1040	3	33.94	42	0.38014	5.79169	1	0.0164614	-1	28.56	37.5	17.4	16.54	9.53	10.68	4.14	4.23	6.93	14.24	8.76	7.6	6.54	6.45	2.5	1.83	5.58	6.06	2.02	2.89	0
226	MSTRG.19159	2	116.58	1.20705	1	NA	NA	959	3	33.99	44	0.31353	9.69403	1	0.017146	-1	37.33	28.68	17.31	16.68	13.67	10.96	6.47	6.16	7.31	9.5	5.85	6.05	7.83	4.38	3.13	1.98	8.56	3.76	1.88	2.51	0
227	MSTRG.19166	2	79.325	0.409394	1	NA	NA	816	1	35.17	26	0.39106	9.81976	1	0.0110528	-1	42.52	22.3	16.18	19	19.88	7.36	6.5	8.83	6.01	7.24	4.54	4.42	6.5	4.54	2.82	2.33	10.18	3.07	2.33	3.44	0
228	MSTRG.1930	2	127.615	4.17619	1	NA	5.12593	1053	0	38.65	16	0.35389	6.70392	-1	0.02834	-1	31.15	30.2	22.79	15.86	10.55	9.03	6.84	4.75	5.99	11.12	7.22	5.89	8.84	6.37	4.85	2.76	5.8	3.61	3.9	2.47	0
229	MSTRG.19341	2	79.77	6.67834	1	NA	8.51852	854	2	37.7	43	0.40046	10.256	1	0.0294555	-1	35.13	27.17	19.2	18.5	14.65	7.85	5.04	7.5	5.74	8.21	8.32	4.92	5.74	6.8	3.05	3.63	9.03	4.34	2.81	2.34	1
230	MSTRG.19344	2	38.815	0.916286	1	NA	NA	842	0	31.59	70	0.29128	7.60602	1	0.0339372	-1	28.62	39.79	16.86	14.73	7.61	12.84	4.76	3.33	10.7	15.7	6.9	6.54	6.78	4.28	3.33	2.5	3.57	6.9	1.9	2.38	0
231	MSTRG.19484	16	214.955	1.11858	1	NA	NA	5383	1	33.59	90	0.29618	11.1221	1	0.0700966	-1	35.09	31.32	16.09	17.5	13.71	9.25	5.96	6.17	7.54	11.63	5.13	7.02	6.35	4.81	2.95	1.97	7.49	5.63	2.03	2.34	0
232	MSTRG.19517	2	71.03	1.85579	1	NA	NA	719	1	31.15	26	0.28785	8.63275	1	0.00747531	-1	37	31.85	15.44	15.72	16.3	11.84	3.2	5.71	9.19	9.75	6.96	5.85	5.99	5.29	2.37	1.81	5.43	5.01	2.92	2.37	0
233	MSTRG.19537	2	75.72	152.271	1	NA	6.09195	950	0	36.63	44	0.30436	7.99774	1	0.011863	-1	39.05	24.32	19.68	16.95	17.18	8.43	6.32	7.17	6.01	7.69	6.22	4.32	7.17	4.95	4.53	3.06	8.75	3.16	2.63	2.42	0
234	MSTRG.19619	1	151.925	0.879598	1	NA	NA	878	1	36.33	78	0.30192	7.77509	1	0.0461722	-1	32.8	30.87	19.93	16.4	10.95	10.83	5.13	5.82	8.44	8.44	8.32	5.7	8.1	6.39	2.96	2.51	5.36	5.13	3.53	2.39	0
235	MSTRG.19678	2	75.985	12.5883	1	0.475	NA	2498	2	32.03	106	0.26715	5.23492	1	0.374009	-1	34.31	33.67	15.77	16.25	13.82	10.61	4.33	5.57	8.89	13.1	5.69	6.01	5.73	4.81	3.2	2.04	5.85	5.17	2.56	2.64	1
236	MSTRG.19696	2	71.01	9.8333	2	NA	NA	934	2	34.58	48	0.30825	5.37628	1	0.0212642	-1	25.91	39.51	15.74	18.84	8.79	9.86	3.43	3.86	7.07	16.29	7.18	8.9	4.39	6.32	2.79	2.25	5.68	7.07	2.36	3.75	1
237	MSTRG.19743	3	82.32	4.34574	5	NA	NA	1865	2	40.7	75	0.3887	5.5871	1	0.133784	-1	27.08	32.23	22.9	17.8	7.83	8.74	4.72	5.79	6.28	10.62	9.01	6.33	8.21	7.78	4.88	2.04	4.77	5.1	4.29	3.59	1
238	MSTRG.19749	2	57.365	2.71718	2	NA	NA	1476	2	34.82	69	0.31097	10.2864	1	0.0426375	-1	26.76	38.41	14.43	20.39	8.75	9.56	2.92	5.49	6.64	15.59	6.85	9.36	4.27	6.24	1.76	2.17	7.12	7.05	2.92	3.32	1
239	MSTRG.19774	3	69.205	5.84743	2	NA	NA	2158	0	32.62	79	0.26228	11.1339	1	0.0579479	-1	40.41	26.97	15.15	17.47	16.6	9.83	6.58	7.42	9.13	8.99	3.94	4.91	6.49	4.45	2.46	1.72	8.21	3.71	2.18	3.38	1
240	MSTRG.19777	17	229.282	17.9523	9	0.451433	8.23213	4922	1	41.1	803	0.3896	8.63922	-1	0.977182	1	31.23	27.67	21.03	20.07	10.2	7.52	6.08	7.44	5.75	7.56	7.64	6.73	8.58	7.68	3.58	1.2	6.71	4.9	3.74	4.71	1
241	MSTRG.19779	6	147.54	2.98116	1	NA	NA	1408	1	34.09	56	0.3167	4.43732	1	0.0504774	-1	30.47	35.44	16.48	17.61	10.16	9.67	4.9	5.69	8.32	14	6.25	6.89	6.75	5.61	2.35	1.78	5.26	6.11	2.99	3.27	1
242	MSTRG.19796	2	175.22	1.79921	2	NA	NA	1995	4	21.8	49	0.32762	4.66266	1	0.0299245	-1	40.25	37.94	9.82	11.98	15.1	17.7	3.16	4.26	16.25	12.49	4.81	4.41	4.01	3.51	0.9	1.4	4.91	4.26	0.9	1.91	1
243	MSTRG.19806	6	229.375	16.4194	7	0.4	8.88023	53776	40	33.53	626	0.24304	7.89081	1	0.999998	1	33.46	33.01	17.69	15.84	12.54	10.21	5.67	5.03	8.62	12.27	6.19	5.93	6.58	5.73	3.21	2.16	5.71	4.8	2.61	2.72	1
244	MSTRG.19813	2	87.52	3.00398	1	NA	6.10899	1187	0	39.85	38	0.34976	6.48895	1	0.00917443	-1	33.78	26.37	19.97	19.88	12.14	7.5	6.58	7.59	5.56	9.19	5.4	6.24	7.93	5.23	4.05	2.78	8.18	4.47	3.96	3.2	1
245	MSTRG.19827	2	103.22	14.8735	2	0.77715	7.85417	3634	2	48.05	79	0.39586	10.9031	1	0.13164	-1	29.72	22.23	25.7	22.34	10.38	6.77	5.64	6.91	4.05	5.81	8.73	3.66	6.52	6.72	6.03	6.44	8.78	2.92	5.31	5.34	1
246	MSTRG.19831	5	196.28	23.4528	11	0.19165	8.84081	2328	2	40.34	87	0.43497	6.91022	1	0.266771	-1	29.85	29.81	19.89	20.45	9.63	7.35	5.37	7.48	5.89	10.79	7.22	5.93	6.36	7.13	4	2.41	7.99	4.56	3.27	4.64	1
247	MSTRG.19833	2	182.89	3.78936	1	NA	5.90506	1087	2	32.66	47	0.27057	9.89972	1	0.0229741	-1	30.91	36.43	13.43	19.23	10.22	10.41	3.31	6.91	8.1	13.44	5.62	9.3	6.26	4.6	1.93	0.64	6.35	8.01	2.58	2.3	1
248	MSTRG.19838	2	54.67	0.906085	1	NA	NA	440	1	40.91	25	0.39661	9.78851	1	0.0108197	-1	29.55	29.55	23.64	17.27	10.93	6.15	5.92	6.38	6.61	10.25	7.06	5.69	5.47	7.29	7.74	3.19	6.61	5.92	2.73	2.05	0
249	MSTRG.19840	2	134.89	12.2407	1	0.314275	6.875	903	0	43.41	122	0.36024	5.37177	1	0.666717	1	28.9	27.69	17.17	26.25	9.53	7.32	3.99	7.98	5.21	8.65	4.99	8.87	6.54	5.54	3.33	1.77	7.65	6.21	4.88	7.54	1
250	MSTRG.19841	2	97.79	5.20444	2	NA	NA	1050	0	38.57	37	0.34223	12.0693	1	0.0177234	-1	28.29	33.14	15.24	23.33	8.96	9.15	3.53	6.67	4.96	12.96	6.29	8.96	5.53	4.86	1.81	2.96	8.77	6.2	3.62	4.77	1
251	MSTRG.19843	4	169.255	5.44478	2	0.375167	5.41031	1727	2	35.55	80	0.37491	5.80328	1	0.137387	-1	35.9	28.55	19.22	16.33	13.56	9.27	6.89	6.2	6.6	9.97	5.97	6.03	8.81	5.62	3.13	1.62	6.89	3.71	3.24	2.49	1
252	MSTRG.19856	3	83.69	5.69414	2	0	6.63061	2626	3	36.75	98	0.39544	8.8172	1	0.263401	-1	27.38	35.87	18.35	18.39	8.76	9.3	3.47	5.83	7.05	13.9	7.5	7.43	5.83	7.35	3.28	1.9	5.75	5.33	4.11	3.2	0
253	MSTRG.19864	3	193.83	25.2529	5	0.125	7.73734	2684	1	33.83	101	0.33228	5.83405	1	0.240092	-1	35.69	30.48	20.19	13.64	14.72	9.21	7.6	4.14	7.04	10.18	7.27	6	8.57	6.67	3.28	1.68	5.37	4.4	2.05	1.83	1
254	MSTRG.19865	1	166.04	0	1	NA	NA	1997	1	35.75	101	0.39358	5.83405	1	0.427034	-1	31.55	32.7	21.33	14.42	11.72	9.62	5.76	4.46	5.96	12.53	8.52	5.71	8.62	6.16	4.41	2.1	5.26	4.41	2.61	2.15	1
255	MSTRG.19871	2	87.29	6.35689	2	0	NA	1251	3	41.17	76	0.3504	10.1679	1	0.0707075	-1	27.98	30.86	18.94	22.22	8.72	7.84	4.08	7.28	6	13.28	5.52	6.08	5.84	4.88	5.52	2.72	7.44	4.88	3.76	6.16	1
256	MSTRG.19877	3	96.135	4.74189	2	NA	NA	2241	1	34.09	39	0.29368	4.82697	1	0.0204257	-1	32.22	33.69	16.91	17.18	12.95	10.22	4.29	4.73	7.59	12.54	7.72	5.85	4.6	5.71	2.99	3.62	7.1	5.18	1.92	2.99	1
257	MSTRG.19884	2	74.6875	25.6063	2	0.20345	7.28508	1113	2	34.95	34	0.30453	6.51288	1	0.00779102	-1	35.22	29.83	20.84	14.11	14.12	8.81	6.12	6.12	6.65	10.25	8.27	4.68	7.82	7.1	4.41	1.53	6.65	3.69	2.07	1.71	1
258	MSTRG.19885	2	NA	NA	1	NA	NA	1056	2	34.85	34	0.30453	6.51288	1	0.00779102	-1	35.32	29.83	20.93	13.92	14.22	9	5.88	6.16	6.45	10.24	8.44	4.74	8.15	6.82	4.64	1.33	6.54	3.7	1.99	1.71	0
259	MSTRG.19886	2	130.79	3.93495	1	NA	NA	645	0	29.92	55	0.28868	8.66583	1	0.0202721	-1	38.29	31.78	17.98	11.94	15.06	11.02	7.3	4.81	9.47	11.65	5.59	5.12	9.16	6.21	1.86	0.78	4.66	2.95	3.26	1.09	1
260	MSTRG.19889	2	63.81	823.819	2	0.18175	5.35985	19248	7	37.98	189	0.31512	9.65033	1	0.735859	1	30.83	31.19	19.44	18.55	10.68	9.04	5.56	5.55	7.78	10.29	6.73	6.39	6.2	6.21	3.86	3.17	6.17	5.65	3.29	3.44	1
261	MSTRG.19890	6	181.86	12.3855	4	0.38035	8.94027	7242	1	39.2	139	0.33031	9.55377	1	0.398437	-1	31.5	29.3	20.51	18.7	10.69	8.89	6.05	5.87	6.88	9.11	7.13	6.17	7.18	6.34	3.99	3	6.75	4.94	3.34	3.66	1
262	MSTRG.19894	2	97.56	9.12057	2	0.307562	7.74624	2896	3	45.89	109	0.33447	11.3693	1	0.147374	-1	25.24	28.87	23.27	22.62	5.53	6.87	5.04	7.81	4.97	8.05	8.84	7.01	7.36	8.08	4.87	2.97	7.39	5.87	4.49	4.84	1
263	MSTRG.19896	3	94.44	41.7704	4	0.31572	5.67105	2687	2	42.2	61	0.37128	7.89581	1	0.0343556	-1	26.57	31.22	18.16	24.04	7.67	7.67	4.13	7.07	7.89	11.58	5.85	5.92	4.17	5.58	3.83	4.58	6.85	6.4	4.32	6.48	1
264	MSTRG.19901	4	210.535	26.6359	3	0.32	9.51943	91870	57	41.74	533	0.28683	8.48175	1	0.999997	1	28.37	29.45	21.97	20.2	8.92	7.68	5.42	6.35	6.19	9.49	7.42	6.35	6.66	6.97	5.11	3.23	6.6	5.31	4.02	4.28	1
265	MSTRG.19905	6	164.9	15.5716	4	0.608333	7.196	2896	1	39.85	63	0.38329	11.1046	1	0.0607011	-1	35.95	24.21	20.96	18.89	12.64	6.56	7.91	8.84	5.42	7.53	6.08	5.18	9.36	6.29	3.49	1.8	8.5	3.83	3.49	3.07	1
266	MSTRG.19906	8	163.815	30.5499	2	0.5125	NA	3698	2	36.02	57	0.32961	9.8869	1	0.0294453	-1	34.07	29.91	16.2	19.82	12.52	9.09	5.14	7.33	7.2	10.79	5.33	6.6	6.38	4.6	2.79	2.43	7.98	5.44	2.95	3.44	1
267	MSTRG.19908	2	66.7175	319.033	2	0.45775	5.55556	451	1	41.91	28	0.36023	9.51532	1	0.00949378	-1	30.16	27.94	22.39	19.51	9.56	6.89	5.78	8	8	10	6.67	3.11	6.22	5.11	6.89	4.22	6.44	6	2.89	4.22	1
268	MSTRG.19909	4	136.765	63.0241	10	0.5935	8.66621	3055	2	43.7	199	0.46254	10.1942	1	0.997217	1	30.64	25.66	19.57	24.12	9.66	7.66	5.14	8.19	5.73	7.92	5.57	6.45	6.06	4.42	5.04	4.03	9.2	5.66	3.83	5.44	1
269	MSTRG.19915	2	166.83	11.4083	7	0.489701	7.91819	5206	1	46	100	0.33472	9.30121	1	0.135779	-1	28.12	25.87	22.38	23.63	9.2	6.17	5.42	7.32	5	6.17	7.84	6.88	6.21	7.24	4.82	4.11	7.7	6.3	4.3	5.32	1
270	MSTRG.19917	2	86.805	8.32311	2	0.340733	4.75746	1145	1	47.07	61	0.45048	4.89764	1	0.134474	-1	23.67	29.26	17.64	29.43	6.21	5.86	3.76	7.78	3.85	10.23	6.03	9.18	4.2	6.21	2.97	4.28	9.35	6.99	4.9	8.22	1
271	MSTRG.19922	5	211.845	9.17339	2	0.325	9.68481	2307	2	41.48	222	0.46342	10.8011	-1	0.436385	-1	30.73	27.79	18.94	22.54	8.5	7.07	6.16	9.02	5.9	8.85	6.07	6.94	7.59	5.94	3.3	2.12	8.76	5.94	3.43	4.42	1
272	MSTRG.19929	5	108.308	23.9064	4	0.323117	7.19208	3071	0	46.21	76	0.34669	7.91632	1	0.0566524	-1	27.35	26.44	20.58	25.63	9.12	6.22	4.2	7.82	4.1	8.08	7.92	6.35	5.02	6.29	4.63	4.63	9.12	5.86	3.84	6.81	1
273	MSTRG.19930	3	121.13	17.7407	3	NA	7.30929	1076	2	34.57	53	0.3241	9.18451	1	0.0213633	-1	27.42	38.01	17.94	16.64	10.42	8.09	3.63	5.21	6.79	15.26	9.67	6.33	4.74	7.91	2.88	2.42	5.4	6.79	1.77	2.7	1
274	MSTRG.19931	5	200.825	6.96165	5	0.25	NA	3308	2	39.69	208	0.34931	6.49689	1	0.990099	1	24.76	35.55	19.29	20.41	7.2	7.02	4.63	5.9	5.29	12.94	8.38	8.95	5.84	7.77	3.39	2.3	6.44	7.8	2.9	3.27	1
275	MSTRG.19932	5	201.255	8.59265	4	0.201383	8.82461	3137	1	40.36	158	0.31512	9.60126	1	0.48847	-1	25.18	34.46	19.7	20.66	7.46	6.6	4.59	6.54	5.2	12.69	8.23	8.32	5.8	8.04	3.22	2.65	6.73	7.14	3.67	3.12	1
276	MSTRG.19935	4	179.52	11.8585	3	NA	6.40359	7610	2	38.44	96	0.28159	10.6966	1	0.0769246	-1	31.42	30.14	22.34	16.1	10.62	8.36	6.3	6.15	6.69	9.2	8.06	6.19	8.71	7.79	4.57	1.26	5.4	4.8	3.4	2.5	1
277	MSTRG.19936	2	59.25	10.5363	1	NA	8.85204	629	0	31.64	25	0.42632	5.06036	1	0.0111167	-1	29.09	39.27	16.85	14.79	8.92	10.99	4.14	4.94	8.28	16.24	8.12	6.69	6.05	7.32	1.91	1.59	5.89	4.78	2.55	1.59	1
278	MSTRG.19938	5	121.83	2.16036	2	0.55	NA	4936	2	40.62	112	0.28518	8.33051	1	0.132955	-1	30.53	28.85	21.54	19.08	10.46	7.7	6.34	6.04	5.86	8.65	7.42	6.93	7.34	7.74	4.28	2.19	6.89	4.74	3.51	3.93	1
279	MSTRG.19941	4	91.26	26.5093	12	0.54165	8.36616	119844	31	40.14	482	0.29202	8.35309	1	0.999992	1	30.74	28.76	19.61	20.88	10.31	7.32	5.64	7.47	6.54	8.67	6.56	6.98	6.6	6.74	3.75	2.53	7.29	6.03	3.66	3.9	1
280	MSTRG.19942	2	88.23	0	3	NA	NA	28385	6	41.12	120	0.28683	5.65436	1	0.417496	-1	28.94	29.89	21.57	19.6	9.5	7.24	5.76	6.43	6.2	9.26	8.23	6.2	7.38	7.56	3.8	2.83	5.85	5.84	3.77	4.13	0
281	MSTRG.19949	2	87.66	0	1	NA	NA	114821	8	39.53	912	0.29583	5.45343	1	1	1	32.21	28.26	18.47	21.05	10.33	7.55	6.03	8.29	7.06	8.8	5.47	6.93	6.46	6.12	3.46	2.43	8.36	5.79	3.52	3.39	0
282	MSTRG.19950	2	162.757	108.52	9	0.375706	5.44771	160347	24	38.78	912	0.29178	5.45343	1	1	1	32.56	28.66	17.97	20.81	10.6	7.78	5.89	8.29	7.41	9.06	5.24	6.94	6.28	6.02	3.37	2.29	8.27	5.8	3.45	3.29	1
283	MSTRG.19951	2	74.19	0	1	NA	NA	10157	1	44.37	515	0.32661	5.95831	1	1	1	27.73	27.89	22.89	21.48	7.53	6.49	6.23	7.48	4.66	9.1	7.58	6.56	7.47	7.36	4.99	3.06	8.06	4.95	4.09	4.38	0
284	MSTRG.19958	1	84.45	2.44766	1	0.625	3.03461	2253	1	40.21	97	0.33029	7.94891	1	0.119568	-1	32.13	27.65	19.75	20.46	11.46	7.9	5.68	7.1	5.86	7.55	7.37	6.88	7.02	6.75	3.73	2.22	7.77	5.46	2.98	4.26	1
285	MSTRG.19972	2	143.235	52.9362	2	0	6.52727	2896	1	41.16	124	0.3582	9.8537	1	0.375246	-1	28.25	30.59	19.85	21.31	7.53	7.7	5.11	7.91	6.53	10.6	6.74	6.7	6.53	6.53	4.46	2.35	7.67	5.77	3.52	4.35	1
286	MSTRG.19974	5	77.39	18.4034	2	0.0769	5.92258	1814	1	35.28	63	0.31589	8.29584	1	0.0266526	-1	28.67	36.05	16.87	18.41	9.21	9.93	4.36	5.13	7.45	13.4	6.89	8.33	6.23	6.29	2.54	1.82	5.79	6.4	3.09	3.14	1
287	MSTRG.19975	2	168.84	27.9625	1	0.41665	7.53943	1376	2	36.63	49	0.40996	9.3028	1	0.0347069	-1	37.57	25.8	16.13	20.49	14.98	8.22	5.31	9.09	7.78	7.56	4.73	5.67	6.76	4.58	3.2	1.6	8.07	5.45	2.84	4.15	1
288	MSTRG.19978	2	190.39	9.99466	1	NA	8.80515	627	1	39.07	33	0.39151	9.36957	1	0.0134407	-1	32.38	28.55	23.6	15.47	10.54	8.47	7.51	5.91	6.23	7.99	7.83	6.55	10.38	6.87	5.43	0.8	5.27	5.27	2.88	2.08	1
289	MSTRG.19979	2	186.32	17.821	1	0.5263	8.37146	2440	2	38.93	49	0.31494	9.58087	1	0.0197953	-1	34.59	26.48	19.43	19.51	13.49	7.63	5.45	8.04	8.57	7.79	5.82	4.31	6.6	5.66	4.06	3.12	5.9	5.41	4.1	4.06	1
290	MSTRG.19980	5	183.245	8.64087	5	NA	9.03758	2888	1	41.79	119	0.35262	4.72382	1	0.700166	1	24.93	33.28	22.47	19.32	7.27	6.93	4.92	5.82	5.33	10.63	9.94	7.38	5.99	9.39	4.12	2.94	6.34	6.34	3.46	3.19	1
291	MSTRG.19981	3	70.73	23.992	3	0.5556	9.19521	3767	5	38.36	67	0.31488	9.29767	1	0.0351843	-1	32.97	28.67	18.32	20.04	10.91	8.26	5.5	8.28	8.18	9.64	5.76	5.1	6.85	5.42	3.72	2.34	7.04	5.34	3.35	4.33	1
292	MSTRG.20000	3	137.74	6.11022	4	NA	7.76866	11230	6	41.27	162	0.36225	9.40009	1	0.790346	1	27.94	30.78	20.33	20.94	9.47	7.35	4.38	6.74	5.3	9.73	7.98	7.77	6.55	7.97	4.21	1.6	6.63	5.73	3.76	4.83	1
293	MSTRG.20006	5	58.3	9.18278	5	NA	NA	1954	2	31.32	48	0.29624	6.49811	1	0.0157737	-1	27.02	41.66	14.33	16.99	9.32	9.88	2.97	4.86	9.11	17.67	6.81	8.04	3.43	7.63	2.36	0.92	5.12	6.5	2.2	3.17	1
294	MSTRG.20007	2	97.69	5.81262	1	0.8889	6.5702	2099	3	43.69	146	0.30633	9.64594	1	0.342292	-1	30.3	26.01	23.92	19.77	11.39	5.82	7.29	5.82	5.86	7.34	8.15	4.67	6.82	8.48	4.96	3.67	6.24	4.39	3.53	5.58	1
295	MSTRG.20013	2	102.965	1.84609	1	NA	NA	675	1	38.67	75	0.41113	6.53265	1	0.124232	-1	28.15	33.19	20.15	18.52	8.46	6.97	6.97	5.79	4.9	13.65	5.93	8.61	7.86	7.86	3.41	1.04	6.97	4.75	3.86	2.97	0
296	MSTRG.20015	4	84.665	15.3093	5	0.29051	7.39921	3249	3	42.87	101	0.37025	6.99921	1	0.251928	-1	27.36	29.76	21.88	20.99	8.31	7.02	5.08	6.96	5.33	9.54	7.3	7.57	6.93	7.57	5.23	2.16	6.77	5.63	4.28	4.31	1
297	MSTRG.20018	3	158.683	159.358	3	0.544033	6.68184	2747	2	41.21	232	0.3126	9.16046	1	0.939766	1	31.53	27.27	20.35	20.86	10.82	8.23	6.34	6.15	8.19	7.76	5.64	5.64	5.83	6.26	4.41	3.86	6.66	5.03	3.97	5.21	1
298	MSTRG.20023	5	178.85	21.4239	12	0.6	5.83916	6392	2	42.01	101	0.3351	9.50909	1	0.141316	-1	27.75	30.24	20.71	21.29	8.56	6.73	5.65	6.82	5.3	10.77	6.93	7.24	6.98	6.73	3.96	3.05	6.9	6.02	4.18	4.18	1
299	MSTRG.20067	4	181.9	4.21273	2	NA	NA	2606	3	40.94	204	0.33346	9.11639	1	0.916743	1	25.52	33.54	21.95	18.99	7.79	6.99	4.64	6.07	5.34	11.13	9.52	7.56	6.3	9.4	3.84	2.42	6.1	6.03	3.92	2.96	1
300	MSTRG.20077	4	138.45	4.19236	1	0.2353	2.70492	1416	1	33.83	55	0.31136	4.3515	1	0.0514693	-1	27.4	38.77	14.27	19.56	8.34	10.74	3.39	4.88	8.06	15.27	6.43	9.05	4.66	5.8	2.05	1.77	6.36	7	2.33	3.89	1
301	MSTRG.20102	3	132.05	5.89288	2	0.5	7.88171	970	1	36.08	150	0.4302	6.08832	1	0.961883	1	28.56	35.36	11.96	24.12	7.84	9.49	3.72	7.43	5.99	12.8	5.78	10.84	5.47	4.54	0.72	1.24	9.18	8.57	1.75	4.64	1
302	MSTRG.20114	2	85.04	0.271749	1	NA	NA	1842	0	38.06	57	0.38891	8.38495	1	0.0348298	-1	29.75	32.19	17.05	21.01	9.4	8.42	4.78	7.12	6.68	11.62	5.49	8.42	6.14	6.03	3.2	1.68	7.5	6.14	3.59	3.8	0
303	MSTRG.20128	2	50.41	1.15331	1	NA	NA	3903	4	26.67	62	0.22328	9.20685	1	0.0582011	-1	37.05	36.28	12.73	13.94	14.4	13.66	4.41	4.56	12.1	13.89	4.77	5.54	5.23	4.41	2.13	0.97	5.33	4.33	1.44	2.84	1
304	MSTRG.20173	2	108.57	0.70435	1	NA	NA	527	0	31.69	58	0.43243	4.383	1	0.145191	-1	37	31.31	12.52	19.17	14.07	12.36	4.75	5.89	8.75	11.6	3.8	7.22	5.51	3.23	2.09	1.52	8.56	4.18	1.9	4.56	0
305	MSTRG.20179	2	87.015	23.7142	3	NA	5.9379	1063	2	34.34	63	0.28813	9.77313	1	0.0315402	-1	39.79	25.87	17.69	16.65	16.95	10.08	6.5	6.21	7.16	8.57	5.46	4.71	8.38	3.48	3.58	2.26	7.34	3.77	2.17	3.39	1
306	MSTRG.20212	5	70.7275	32.4348	1	0.8462	NA	2709	0	34.88	81	0.25066	10.3655	1	0.0606147	-1	39.2	25.91	19.49	15.39	16.84	8.31	7.13	6.91	6.83	8.9	5.91	4.28	8.38	4.87	3.95	2.29	7.13	3.84	2.51	1.92	0
307	MSTRG.20245	2	86.08	16.6054	1	NA	5.05357	1036	0	36.1	89	0.33124	6.79437	-1	0.0784819	-1	24.23	39.67	15.54	20.56	6.47	9.47	3.86	4.44	7.34	15.75	6.86	9.76	4.54	6.67	1.84	2.42	5.89	7.83	3	3.86	1
308	MSTRG.20280	2	103.96	2.00997	1	NA	NA	707	1	37.62	102	0.49563	5.85931	1	0.547272	1	30.69	31.68	17.68	19.94	12.18	8.78	3.12	6.52	4.67	11.33	8.22	7.51	5.38	5.38	4.11	2.83	8.36	6.23	2.27	3.12	1
309	MSTRG.20312	4	74.95	7.62828	2	0.6667	7.26098	1125	1	36.44	55	0.28176	7.78265	-1	0.145584	-1	35.82	27.73	21.51	14.93	12.46	10.5	7.03	5.87	8.19	7.65	6.49	5.43	10.23	4.98	4.63	1.6	4.98	4.54	3.38	2.05	1
310	MSTRG.20607	3	90.4925	8.08521	4	NA	4.54644	1218	0	39.9	62	0.38519	9.50714	1	0.0519346	-1	27.26	32.84	18.88	21.02	8.87	8.46	4.52	5.34	5.18	10.68	8.71	8.3	5.92	7.07	3.37	2.55	7.31	6.66	2.3	4.77	0
311	MSTRG.20664	3	155.84	1.72287	3	NA	NA	1596	1	34.59	60	0.2798	9.93622	1	0.0304815	-1	38.6	26.82	19.24	15.35	16.18	9.47	6.83	6.14	6.14	8.53	7.27	4.83	9.53	4.95	2.7	2.07	6.77	3.82	2.45	2.32	0
312	MSTRG.20692	3	96.965	10.4855	1	NA	NA	9285	2	36.36	863	0.32414	5.64105	1	1	1	30.75	32.89	15.75	20.61	11.2	9.14	4.16	6.24	6.96	11.86	5.81	8.27	5.32	6.03	2.73	1.67	7.27	5.86	3.06	4.43	0
313	MSTRG.20699	2	99.45	52.4224	4	0.468275	4.28748	2506	1	44.73	462	0.45981	9.48444	1	1	1	26.58	28.69	20.59	24.14	7.86	6.95	4.35	7.39	5.07	8.14	7.5	7.98	4.91	7.35	4.35	3.99	8.74	6.27	4.39	4.75	1
314	MSTRG.20776	3	71.155	51.8586	2	NA	NA	8254	6	27.24	67	0.23537	9.73236	1	0.0526585	-1	35.01	37.75	13.96	13.28	14.07	12.01	4.43	4.51	11.06	15.9	5.33	5.45	5.39	4.7	2.46	1.41	4.5	5.14	1.73	1.91	0
315	MSTRG.20810	2	54.255	1.03198	1	NA	NA	703	1	38.83	52	0.4332	6.03339	1	0.0444642	-1	33.57	27.6	19.63	19.2	8.83	7.41	9.4	7.98	8.4	8.83	4.7	5.56	7.69	4.84	3.99	3.13	8.69	6.41	1.57	2.56	0
316	MSTRG.20834	2	82.485	2.06902	2	NA	NA	744	1	36.29	39	0.377	9.09955	1	0.0150142	-1	34.54	29.17	21.51	14.78	13.59	8.61	6.46	5.92	6.59	9.15	7.94	5.38	7.54	7.67	4.58	1.75	6.86	3.63	2.56	1.75	0
317	MSTRG.20871	2	77.29	1.53989	1	NA	NA	805	1	40.12	57	0.40281	9.3598	1	0.0482856	-1	34.16	25.71	18.88	21.24	13.68	6.72	6.59	7.09	6.34	7.71	4.98	6.72	6.47	6.47	3.36	2.61	7.59	4.85	3.98	4.85	0
318	MSTRG.20955	2	124.468	13.261	3	0.25	3.47339	1158	1	39.81	33	0.30329	11.7114	1	0.0192888	-1	32.47	27.72	24.96	14.85	10.46	7.61	7.78	6.66	6.66	8.12	8.82	4.15	9.59	8.12	5.1	2.16	5.79	3.89	3.2	1.9	1
319	MSTRG.21099	2	77.2025	108.843	2	0.39665	2.69173	764	0	38.61	66	0.31343	9.51068	1	0.0349197	-1	39.27	22.12	20.68	17.93	17.3	7.47	6.82	7.6	4.19	7.47	6.16	4.33	8.78	3.54	4.85	3.54	8.91	3.67	2.88	2.49	0
320	MSTRG.21278	3	69.64	16.8815	4	0.38095	3.626	1649	2	36.02	102	0.32578	9.76666	1	0.130994	-1	29.53	34.45	15.16	20.86	9.95	8.8	3.58	7.16	7.46	12.99	6.25	7.77	4.79	6.49	2.06	1.82	7.28	6.19	3.28	4.13	1
321	MSTRG.2131	8	193.04	67.6602	10	0.2667	6.76792	7982	4	39.8	259	0.2765	12.098	1	0.433425	-1	28.34	31.86	21.07	18.73	8.86	8.65	4.84	6	7.44	10.5	7.96	5.96	6.54	6.73	4.4	3.4	5.49	5.99	3.88	3.37	0
322	MSTRG.2132	1	156.46	0	1	NA	NA	2242	0	34.26	66	0.33972	4.56305	1	0.0842978	-1	28.55	37.2	20.03	14.23	8.66	9.59	4.91	5.4	9.01	14.55	8.08	5.58	6.34	7.9	4.19	1.56	4.55	5.18	2.86	1.65	0
323	MSTRG.21342	2	120.035	139.563	2	0.2843	6.51292	920	0	32.61	39	0.28535	6.5108	1	0.0117323	-1	32.83	34.57	15.98	16.63	13.38	9.47	4.9	5.11	8.71	14.04	4.9	6.96	5.55	5.44	3.59	1.31	5.22	5.55	2.61	3.26	0
324	MSTRG.2138	2	70.6925	1.94315	2	NA	NA	576	0	37.5	39	0.40519	6.51532	1	0.0141864	-1	31.6	30.9	15.97	21.53	11.83	9.74	4.7	5.22	8	10.26	4.87	7.83	3.48	5.39	3.13	4	8.35	5.57	3.3	4.35	0
325	MSTRG.21654	2	64.77	1.54626	2	NA	4.90358	819	0	39.93	93	0.42986	8.59308	1	0.320776	-1	29.67	30.4	20.02	19.9	11	7.58	4.65	6.36	6.48	10.64	6.11	7.21	5.5	7.21	4.4	2.93	6.6	5.01	4.89	3.42	0
326	MSTRG.21696	5	92.64	6.11344	6	0.432887	9.4842	5693	2	39.93	118	0.35867	10.1826	1	0.314093	-1	34.09	25.98	21.45	18.48	12.28	7.87	5.96	7.99	6.54	8.75	5.99	4.69	8.2	5.76	5.24	2.25	7.08	3.58	4.27	3.55	0
327	MSTRG.2207	6	87.525	46.8031	4	0.9	6.95312	2057	1	36.8	50	0.28534	6.10394	1	0.0214518	-1	23.19	40.01	17.79	19.01	6.52	8.66	3.11	4.91	5.98	15.56	9.78	8.71	4.77	9.34	1.85	1.8	5.89	6.47	3.06	3.6	1
328	MSTRG.22331	2	74.645	0.935769	1	NA	NA	2000	2	30.35	38	0.31989	5.18915	1	0.0128824	-1	38.15	31.5	15.1	15.25	18.71	9.35	5	5.1	8.6	12.51	5.4	5	4.8	4.95	2.65	2.65	6.05	4.65	2.05	2.5	0
329	MSTRG.2258	2	96.9625	4.36986	2	NA	3.04636	2019	1	38.98	67	0.45181	9.00665	1	0.138899	-1	32.14	28.88	20.01	18.97	10.6	7.93	5.8	7.83	6.05	9.12	7.14	6.59	8.08	6.1	4.16	1.64	7.38	5.75	2.92	2.92	1
330	MSTRG.22790	2	NA	NA	1	NA	NA	403	0	44.67	21	0.4741	6.49579	1	0.00623847	-1	28.54	26.8	26.55	18.11	9.2	7.21	7.46	4.48	6.47	7.46	7.46	5.47	6.97	8.46	6.97	4.23	5.97	3.48	4.73	3.98	0
331	MSTRG.237	2	72.105	3.76209	1	NA	NA	992	0	35.69	49	0.31195	10.1735	1	0.0227616	-1	39.62	24.7	20.16	15.52	16.95	9.08	6.46	7.16	7.87	6.96	6.36	3.53	8.68	5.45	3.73	2.22	6.16	3.23	3.53	2.62	0
332	MSTRG.243	13	228.56	2.10105	1	NA	NA	4446	0	34.44	98	0.28978	10.7447	1	0.0831668	-1	36.28	29.28	15.72	18.71	14.96	9.29	5.22	6.82	7.45	10.73	5.11	6.01	6.07	4.43	2.68	2.54	7.81	4.84	2.72	3.33	0
333	MSTRG.245	4	115.185	27.8648	3	0.498958	4.4023	1436	0	40.67	41	0.42842	10.6398	1	0.0399459	-1	28.2	31.13	20.47	20.19	9.55	6.83	4.95	6.83	5.85	10.8	7.8	6.69	5.99	8.15	3.83	2.51	6.83	5.37	3.9	4.11	0
334	MSTRG.2583	3	149.278	7.96709	2	0.5	4.74093	1162	1	36.06	30	0.33848	11.539	1	0.0155413	-1	24.96	38.98	14.89	21.17	6.72	8.87	2.5	6.8	6.46	16.37	7.41	8.79	4.74	6.8	1.38	1.98	7.06	6.98	3.53	3.62	1
335	MSTRG.2596	2	72.03	20.5102	1	0.2083	4.60342	1118	2	34.88	41	0.28863	4.90277	1	0.0234455	-1	26.12	39	14.04	20.84	7.88	9.94	3.49	4.83	6.62	15.49	6.09	10.74	5.01	5.37	1.97	1.7	6.62	8.24	2.51	3.49	0
336	MSTRG.2608	2	101.31	1.81983	1	NA	NA	1164	0	36.86	96	0.33087	9.57819	1	0.113639	-1	26.89	36.25	15.64	21.22	9.11	7.48	4.04	6.28	5.67	15.05	6.96	8.6	4.99	6.36	2.06	2.15	7.14	7.31	2.58	4.21	0
337	MSTRG.2621	7	169.3	4.6053	2	0.373367	7.26321	2506	1	39.19	56	0.37998	10.1561	1	0.0422761	-1	29.25	31.56	23.34	15.84	9.58	8.1	6.19	5.39	5.71	11.02	8.26	6.59	8.66	8.5	4.99	1.2	5.31	3.91	3.91	2.67	1
338	MSTRG.2720	2	86.83	7.55511	1	NA	3.49593	823	1	38.4	38	0.3747	9.64545	1	0.0164799	-1	32.2	29.4	17.38	21.02	13.02	8.27	4.38	6.57	5.11	10.71	8.03	5.6	3.65	5.96	2.8	4.87	10.34	4.5	2.19	4.01	1
339	MSTRG.275	2	68.64	7.87297	3	0.5	7.41083	2573	0	41.51	80	0.35571	9.38287	1	0.0811449	-1	25.11	33.39	18.58	22.93	6.8	7.66	4.08	6.53	5.64	12.33	6.8	8.63	5.17	6.96	3.77	2.68	7.5	6.45	3.89	5.09	0
340	MSTRG.2763	2	45.97	8.20808	1	0.5	8.64943	765	1	39.48	86	0.43426	6.58282	1	0.266385	-1	28.37	32.16	12.68	26.8	8.77	8.51	2.88	8.25	5.37	10.6	5.37	10.73	3.93	5.1	1.7	1.96	10.34	7.85	2.75	5.89	1
341	MSTRG.2764	3	79.64	7.60037	2	0.633333	NA	2578	3	40.3	90	0.34981	8.61456	1	0.108968	-1	27.97	31.73	25.99	14.31	8.42	8.77	5.74	5.04	5.78	9.93	9.9	6.09	9.04	9.51	6.17	1.28	4.73	3.49	4.19	1.9	1
342	MSTRG.2771	7	155.37	4.90034	4	0.525	8.81103	4152	1	36.9	78	0.28684	6.00629	1	0.0750257	-1	33.77	29.34	20.88	16.02	11.92	9.23	6.38	6.24	7.18	8.84	7.3	6	8.67	6.79	4	1.42	5.97	4.48	3.2	2.36	1
343	MSTRG.2825	2	71.765	35.5204	2	NA	2.19243	691	1	33.86	34	0.40198	11.7114	1	0.0217114	-1	25.76	40.38	18.09	15.77	9.57	11.01	2.46	2.75	7.97	17.25	8.99	6.23	4.2	6.81	3.91	3.04	3.91	5.36	2.75	3.77	0
344	MSTRG.2832	6	201.24	38.5634	7	0.3706	7.84919	2691	1	41.06	93	0.36118	8.39618	1	0.140779	-1	23.41	35.53	19.7	21.37	7.06	6.62	3.9	5.8	5.32	12.6	8.48	9.14	5.5	8.44	3.2	2.57	5.54	7.88	4.09	3.87	1
345	MSTRG.2840	3	78.2575	19.2636	2	0.1111	8.21959	915	2	38.36	43	0.34025	10.612	1	0.0215755	-1	35.63	26.01	19.34	19.02	15.1	7.77	5.03	7.66	5.47	7.22	8.64	4.7	5.91	6.67	2.84	3.94	9.08	4.38	2.84	2.74	1
346	MSTRG.2845	4	119.98	3.03823	5	NA	NA	1505	2	41.46	55	0.36957	9.3952	1	0.0320184	-1	30.76	27.77	19.47	21.99	10.9	7.91	3.92	7.98	5.05	8.71	6.72	7.31	6.58	6.18	4.52	2.19	8.18	4.99	4.32	4.52	0
347	MSTRG.2874	1	78.87	4.45401	1	0.125	NA	1013	1	35.04	149	0.35966	9.39545	1	0.661882	1	35.93	29.02	16.19	18.85	14.03	10.08	6.03	5.73	8.99	9.29	4.74	6.03	5.34	4.84	2.17	3.85	7.61	4.74	3.26	3.26	1
348	MSTRG.2877	2	71.915	1.99658	1	NA	NA	741	1	43.59	49	0.39908	4.89594	1	0.0455765	-1	32.93	23.48	13.77	29.82	10.68	7.43	4.19	10.68	4.32	7.57	2.57	9.05	5.14	2.03	2.97	3.51	12.7	6.49	4.05	6.62	1
349	MSTRG.2887	2	50.85	17.2374	1	NA	8.5906	1239	1	43.18	88	0.26744	11.4523	1	0.064961	-1	40.68	16.14	24.13	19.05	16.56	5.65	8.24	10.26	5.25	3.63	5.17	2.02	9.85	4.28	6.3	3.72	9.05	2.5	4.44	3.07	1
350	MSTRG.2891	3	142.952	17.5567	4	NA	4.66548	1223	2	35.98	60	0.32061	9.86615	1	0.0312699	-1	28.45	35.57	17.91	18.07	9.74	9.33	3.6	5.81	7.69	13.26	7.86	6.79	5.24	6.55	3.76	2.29	5.81	6.38	2.7	3.19	0
351	MSTRG.2893	1	123.085	0	1	NA	NA	1223	2	35.98	60	0.32061	9.86615	1	0.0312699	-1	28.45	35.57	17.91	18.07	9.74	9.33	3.6	5.81	7.69	13.26	7.86	6.79	5.24	6.55	3.76	2.29	5.81	6.38	2.7	3.19	0
352	MSTRG.2910	2	87.42	3.87236	1	0.4	5.66346	1120	0	38.39	46	0.31934	8.57037	1	0.01404	-1	40.36	21.25	20.18	18.21	19.03	8.04	7.33	5.9	6.26	5.45	4.83	4.74	7.6	4.74	4.65	3.22	7.51	2.95	3.4	4.38	1
353	MSTRG.2911	1	59.81	0	1	NA	NA	779	0	40.44	32	0.34764	10.1824	1	0.0133513	-1	39.67	19.9	20.8	19.64	18.77	7.07	7.2	6.68	5.27	4.63	5.27	4.76	6.68	5.4	5.4	3.21	8.87	2.83	2.96	5.01	0
354	MSTRG.2912	8	156.332	13.6202	6	NA	NA	2765	0	32.12	47	0.27397	9.65411	1	0.0209568	-1	42.86	25.03	15.66	16.46	19.1	10.2	6.55	7.02	9.04	8.03	4.02	3.91	6.91	3.44	2.97	2.35	7.81	3.36	2.13	3.15	1
355	MSTRG.2913	2	48.88	6.26083	1	0.25	6.2946	2282	4	44.65	88	0.36783	9.61591	1	0.130276	-1	27.65	27.7	19.94	24.72	8.07	6.97	4.52	8.07	5.44	7.1	7.15	8.02	6.27	6.8	4.12	2.76	7.85	6.84	4.16	5.87	1
356	MSTRG.2915	3	181.015	1.98643	1	0.41665	9.59929	2694	1	38.75	87	0.35772	9.50714	1	0.110518	-1	28.1	33.15	23.79	14.96	9.8	8.76	5.57	3.97	5.94	10.43	9.8	6.98	7.84	8.65	5.35	1.93	4.49	5.31	3.08	2.08	1
357	MSTRG.2918	2	99.59	12.8845	2	NA	6.15793	1771	1	46.19	194	0.41071	4.54901	1	0.999108	1	22.7	31.11	24.34	21.85	6.67	5.76	4.8	5.42	3.45	8.76	9.83	9.1	5.93	10.34	4.92	3.16	6.67	6.27	4.75	4.18	1
358	MSTRG.2923	2	89.56	1.88175	1	NA	NA	650	0	36.15	47	0.4205	9.61871	1	0.0384283	-1	28.62	35.23	16.15	20	9.4	9.71	3.54	6.01	8.17	11.86	6.63	8.47	3.39	7.55	3.24	2	7.55	6.16	2.77	3.54	1
359	MSTRG.2926	3	72.48	11.3695	1	NA	5.83333	874	1	41.08	32	0.42299	9.51337	1	0.0177547	-1	31.69	27.23	21.4	19.68	11.34	7.45	6.07	6.76	7.33	8.59	5.96	5.38	6.3	5.96	5.84	3.32	6.64	5.27	3.55	4.24	1
360	MSTRG.2928	3	132.605	17.961	5	NA	6.93841	1325	1	34.94	41	0.39079	8.38397	1	0.0153831	-1	27.92	37.13	17.36	17.58	10.65	8.69	3.25	5.29	6.72	15.86	7.93	6.65	5.21	6.42	3.47	2.27	5.36	6.12	2.72	3.4	1
361	MSTRG.2956	3	108.84	40.406	4	0.807175	6.67614	3682	3	42.04	94	0.40328	5.43304	1	0.406016	-1	30.12	27.84	21.92	20.12	10.46	8.04	5.3	6.3	6.38	8.77	7.36	5.32	5.43	7.09	5.32	4.07	7.85	3.91	3.94	4.43	1
362	MSTRG.2964	4	109	2785.51	8	0.4	5.22143	15100	11	35.55	129	0.2759	8.4151	1	0.201542	-1	32.7	31.75	20.14	15.41	12.15	9.29	6.05	5.2	7.64	11.19	7.29	5.62	7.13	6.74	4.08	2.19	5.77	4.53	2.72	2.4	1
363	MSTRG.2965	3	90.7275	209.139	6	0.6591	4.88513	1155	1	43.12	44	0.40742	9.1507	1	0.0251936	-1	29.61	27.27	25.28	17.84	8.41	7.97	7.89	5.29	7.63	7.02	7.63	5.03	9.01	6.41	6.15	3.73	4.51	5.89	3.64	3.81	1
364	MSTRG.2966	4	141.95	1.9366	1	NA	NA	1333	0	34.43	69	0.32263	7.65582	1	0.034747	-1	25.36	40.21	16.88	17.55	7.51	10.21	3.68	3.98	7.36	16.52	6.83	9.46	5.11	6.76	3.45	1.58	5.41	6.68	2.93	2.55	1
365	MSTRG.2990	3	93.16	12.6349	5	0.5119	7.9572	1101	3	33.33	50	0.33183	10.1064	1	0.0242582	-1	35.42	31.24	17.44	15.89	14.18	9.64	5.18	6.36	7.18	11.18	7.18	5.73	7.45	6	2.45	1.55	6.64	4.36	2.64	2.27	1
366	MSTRG.2992	4	223.873	7.65593	4	0	7.21703	2427	1	36.05	47	0.33852	10.0197	1	0.0218984	-1	33.62	30.33	19.65	16.4	12.9	8.16	6.27	6.31	6.6	10.88	6.51	6.35	7.75	6.84	3.59	1.48	6.35	4.45	3.3	2.27	1
367	MSTRG.2999	2	73.48	5.48742	1	0.7287	8.80389	3088	2	44.66	82	0.38742	8.88104	1	0.121873	-1	25.62	29.73	20.6	24.06	8.33	6.48	4.54	6.25	4.08	11.14	7.52	7	5.09	6.61	3.89	5.02	8.13	5.51	4.63	5.8	1
368	MSTRG.3001	1	66.835	1.15304	1	0	NA	702	1	45.58	19	0.32847	5.87665	1	0.00360661	-1	25.21	29.2	19.52	26.07	5.85	8.7	3.42	7.13	5.71	8.42	7.13	7.99	4.56	5.42	4.71	4.85	8.99	6.7	4.28	6.13	1
369	MSTRG.3008	3	104.53	3.0496	1	0.2857	NA	1077	3	40.3	52	0.34002	6.13385	1	0.0201284	-1	27.48	32.22	18.85	21.45	7.81	8.92	5.02	5.76	7.43	11.62	6.51	6.69	5.11	6.32	3.35	4	7.16	5.39	4	4.93	1
370	MSTRG.3012	3	145.548	4.43715	2	0.6713	8.10977	1920	1	43.85	200	0.41223	8.49493	1	0.992681	1	25.42	30.73	23.28	20.57	6.25	6.93	5.32	6.93	4.59	10.68	8.44	7.03	7.14	8.23	5.11	2.76	7.4	4.9	4.43	3.86	1
371	MSTRG.3014	2	104.12	338.442	3	0.6838	4.76237	2128	2	39.05	100	0.27218	7.60101	1	0.101951	-1	25.75	35.2	14.99	24.06	6.86	7.8	3.9	7.19	8.32	13.96	5.12	7.8	4.56	4.09	2.87	3.43	6.02	9.31	3.1	5.64	1
372	MSTRG.3016	3	166.56	13.3036	8	NA	7.4277	34120	13	41.13	493	0.32237	8.07074	1	1	1	28.7	30.17	20.21	20.92	8.09	7.67	5.73	7.22	6.11	10.06	6.88	7.12	6.98	6.82	3.97	2.43	7.51	5.62	3.63	4.16	0
373	MSTRG.3017	3	85.65	980.096	5	0.5833	5.58388	58946	36	40.84	493	0.29367	8.07074	1	0.999997	1	28.64	30.52	20.01	20.84	8.49	7.65	5.35	7.15	6.09	10.42	7.07	6.94	6.59	6.89	4.04	2.49	7.46	5.56	3.55	4.26	1
374	MSTRG.3025	5	213.44	15.4029	7	0.46255	8.88838	3076	1	43.34	73	0.27356	11.5704	1	0.0494871	-1	34.56	22.11	22.14	21.2	11.84	5.79	7.61	9.33	4.68	5.98	5.98	5.46	9.56	5.72	4.1	2.76	8.49	4.59	4.46	3.64	1
375	MSTRG.3033	3	134.02	2.31492	1	0.2857	8.23691	1539	3	36.71	47	0.35913	8.19025	1	0.0160399	-1	36.19	27.1	18.26	18.45	14.5	9.62	5.33	6.76	7.09	7.87	6.57	5.53	7.67	4.81	3.71	2.08	6.96	4.81	2.67	4.03	0
376	MSTRG.3036	3	88.315	9.72821	1	NA	5.75937	10085	3	43.2	375	0.3387	9.38885	1	0.999914	1	29.22	27.58	21.96	21.24	8.57	7.45	5.89	7.32	4.88	9.01	7.34	6.35	8.04	6.44	4.49	2.99	7.74	4.68	4.24	4.57	0
377	MSTRG.3039	2	118.395	6.40993	2	0.3	5.16049	10369	3	42.96	75	0.32607	11.4742	1	0.0542992	-1	27.62	29.41	21.28	21.68	9.09	7.47	4.68	6.39	4.86	8.76	7.84	7.96	6.35	7.4	4.61	2.92	7.33	5.79	4.16	4.41	1
378	MSTRG.3043	2	92.535	0	1	NA	NA	8286	3	42.23	343	0.38046	8.20013	1	0.999991	1	30.07	27.7	20.88	21.35	9.26	7.4	5.14	8.28	5.03	9.16	7.16	6.35	7.21	6.69	4.9	2.08	8.58	4.44	3.68	4.65	0
379	MSTRG.3050	3	162.29	9.40858	3	0.483333	9.65278	8440	4	42.88	152	0.32442	9.32855	1	0.5	1	29.15	27.97	21.71	21.17	9.4	7.36	5.39	7	5.55	7.31	8.11	7	6.84	7.68	4.24	2.95	7.36	5.63	3.97	4.22	1
380	MSTRG.3054	10	149.65	4.09068	2	0.337462	7.03738	3515	3	39	192	0.29603	4.59955	1	0.986224	1	32.77	28.22	15.16	23.84	10.98	7.85	4.95	8.96	6.35	8.85	4.04	8.99	6.66	5.01	2.45	1.05	8.76	6.52	3.73	4.84	1
381	MSTRG.3061	3	93.1	10.6025	2	NA	NA	6572	1	48.52	223	0.35181	8.8244	1	0.981622	1	29.5	21.97	26.2	22.32	10.23	6.47	5.95	6.86	4.03	5.62	8.4	3.91	7.2	6.47	6.1	6.44	8.05	3.42	5.74	5.11	0
382	MSTRG.3063	4	152.15	4.55721	3	0.297406	8.06695	6626	1	48.35	223	0.35181	8.8244	1	0.981622	1	29.57	22.08	26.14	22.22	10.29	6.46	5.99	6.82	4.05	5.72	8.39	3.92	7.2	6.49	6.05	6.38	8.03	3.4	5.71	5.09	1
383	MSTRG.3064	2	189.47	36.3717	4	0.311412	6.69987	3595	4	40.72	201	0.33105	9.53754	1	0.880865	1	28.76	30.51	20.56	20.17	7.9	7.99	5.73	7.12	6.96	10.02	6.82	6.73	6.93	6.73	4.34	2.56	6.98	5.79	3.67	3.73	1
384	MSTRG.3075	5	113.53	4.28455	2	0.49844	6.87758	2794	1	50.39	69	0.38266	4.44073	1	0.161505	-1	27.59	22.01	25.52	24.87	9.2	4.8	5.87	7.73	3.72	5.51	7.34	5.41	6.27	7.23	6.12	5.91	8.41	4.44	6.19	5.84	1
385	MSTRG.3081	3	162.92	169.157	4	0.5626	7.62373	5099	1	44.15	76	0.34103	10.2895	1	0.0653902	-1	28.5	27.36	21.65	22.49	9.3	6.77	5.18	7.26	5.1	7.22	7.85	7.2	6.26	7.38	4.41	3.61	7.83	6	4.22	4.43	1
386	MSTRG.3084	2	218.17	4.64216	1	NA	NA	506	2	37.15	61	0.40371	9.88116	1	0.0650584	-1	35.97	26.88	16.21	20.95	13.66	8.51	5.74	7.92	6.73	7.52	4.75	7.92	7.72	4.36	2.77	1.39	7.72	6.53	2.97	3.76	1
387	MSTRG.3095	4	138.04	21.1546	5	0.75	4.69741	2475	1	37.9	131	0.42096	4.68573	1	0.942626	1	29.21	32.89	15.68	22.22	9.22	9.46	4.04	6.47	7.28	11.32	5.25	9.05	5.66	5.42	2.59	2.02	7.07	6.67	3.8	4.69	1
388	MSTRG.3099	4	65.52	9.23697	5	NA	NA	1146	1	34.64	76	0.33733	9.3526	1	0.057761	-1	39.27	26.09	17.8	16.84	13.54	10.04	6.2	9.52	7.34	9	5.68	4.1	8.56	3.84	4.1	1.31	9.87	3.14	1.83	1.92	1
389	MSTRG.3100	3	120.11	4.23429	2	NA	4.7619	1316	1	37.16	91	0.44222	5.10419	1	0.507764	1	33.59	29.26	14.67	22.49	11.94	8.67	3.88	9.05	6.62	9.13	4.71	8.82	5.86	5.4	2.43	0.99	9.13	6.08	3.65	3.65	1
390	MSTRG.3105	5	201.42	18.0638	3	0.541267	8.42262	2947	1	42.48	108	0.4111	4.8576	1	0.737256	1	24.43	33.08	22.57	19.92	6.75	6.65	4.75	6.25	5.16	10.45	9.91	7.57	6.01	9.54	4.18	2.85	6.48	6.45	3.73	3.26	1
391	MSTRG.3107	3	123.435	8.73971	2	0.465883	8.17539	2918	4	39.03	104	0.36212	6.57526	1	0.28638	-1	28.86	32.11	19.29	19.74	8.23	7.85	5.31	7.44	7.23	11.79	6.48	6.62	5.86	7.16	4.15	2.13	7.54	5.31	3.36	3.53	1
392	MSTRG.3110	2	165.55	5.3655	2	0.2857	6.40686	1372	2	41.62	99	0.29665	11.6661	1	0.0774555	-1	27.48	30.9	16.18	25.44	8.68	6.71	4.01	8.02	6.27	9.77	5.54	9.34	3.57	7.22	2.63	2.77	8.9	7.22	4.01	5.32	1
393	MSTRG.3124	2	71.155	34.1722	5	0.42585	4.85667	1119	1	38.07	55	0.43912	11.4875	-1	0.161911	-1	36.37	25.56	19.39	18.68	15.92	7.51	5.81	7.16	5.72	8.32	7.33	4.11	7.6	4.74	3.76	3.31	7.16	4.92	2.5	4.11	1
394	MSTRG.3126	2	104.845	10.4423	3	0.229175	3.85902	1049	1	37.94	43	0.43354	6.68866	1	0.0222239	-1	35.75	26.31	19.54	18.4	14.98	7.82	5.82	7.06	6.01	8.87	7.25	4.2	7.73	4.96	3.91	2.96	7.06	4.68	2.58	4.1	1
395	MSTRG.3133	5	60.8125	18.1428	2	NA	7.67291	1413	0	32.84	35	0.33031	6.36139	1	0.00766408	-1	39.92	27.25	18.33	14.51	16.78	9.84	7.29	5.95	7.72	8.64	6.37	4.53	7.44	5.45	3.26	2.2	8	3.26	1.42	1.84	1
396	MSTRG.3141	2	64.66	3.1361	1	0.7692	7.10843	856	1	38.2	48	0.33074	10.5772	1	0.0247167	-1	33.76	28.04	20.56	17.64	10.53	10.53	6.78	5.96	6.43	8.07	7.84	5.73	7.72	5.03	3.86	3.98	9.12	4.33	2.11	1.99	1
397	MSTRG.3161	3	98	8.67863	2	NA	3.42612	5616	7	37.3	76	0.32382	9.16779	1	0.0506749	-1	33.33	29.36	18.89	18.41	11.7	9.4	5.25	6.96	7.36	9.1	6.46	6.45	7.14	5.63	3.86	2.26	7.12	5.24	3.31	2.74	0
398	MSTRG.3206	21	216.28	7.02337	4	0.283553	7.2513	6052	3	42.51	70	0.3735	4.43097	1	0.154371	-1	26.62	30.87	19.83	22.69	6.91	6.59	5.14	7.98	5.44	10.11	6.74	8.58	6.71	7.49	4.12	1.52	7.57	6.68	3.82	4.61	1
399	MSTRG.3234	1	77.405	1.93283	1	0.6	2.97272	1062	0	37.57	42	0.34243	4.88934	1	0.0184593	-1	25.61	36.82	18.64	18.93	8.39	8.77	3.86	4.62	6.31	14.51	8.67	7.35	4.81	6.88	3.02	3.86	6.03	6.69	3.11	3.11	0
400	MSTRG.3247	8	115.56	14.1427	3	NA	NA	2664	0	32.58	66	0.26738	8.8913	-1	0.173682	-1	24.55	42.87	16.74	15.84	7.51	10.14	3.27	3.64	9.16	18.74	8.07	6.91	3.79	7.21	3.34	2.4	4.06	6.8	2.07	2.89	1
401	MSTRG.3276	2	75.845	0.99807	1	0.3	NA	1033	1	39.11	177	0.35383	7.03876	-1	0.144689	-1	27.3	33.59	20.14	18.97	7.66	8.24	5.62	5.81	5.04	11.92	8.82	7.75	7.85	7.95	3.39	0.97	6.69	5.52	2.33	4.46	0
402	MSTRG.3286	3	90.845	1.87587	1	NA	NA	1187	1	36.23	69	0.3129	10.644	1	0.0445034	-1	33.95	29.82	19.88	16.34	13.41	8.77	5.48	6.32	6.75	10.12	7.59	5.4	7.67	5.82	3.88	2.53	6.07	5.14	2.95	2.11	1
403	MSTRG.3448	2	117.69	1.14286	3	NA	NA	617	0	38.09	55	0.29374	9.78168	1	0.024971	-1	27.55	34.36	17.67	20.42	8.6	9.25	3.9	5.68	5.36	13.31	8.28	7.47	5.68	5.68	3.08	3.25	7.79	6.17	2.44	4.06	0
404	MSTRG.3516	6	151.175	2.05435	1	0.3333	NA	3959	1	37	133	0.42392	9.81647	1	0.79333	1	30.84	32.15	20.76	16.24	10.06	10.64	5.81	4.35	7.78	10.28	7.96	6.11	7.25	6.32	4.35	2.85	5.76	4.9	2.65	2.93	1
405	MSTRG.3637	2	62.76	32.3688	2	0.1667	6.08896	1221	0	34.81	54	0.28266	10.1679	1	0.0271926	-1	27.85	37.35	14.17	20.64	8.85	9.59	3.85	5.57	8.03	13.85	6.23	9.18	4.43	5.49	1.64	2.62	6.56	8.36	2.46	3.28	0
406	MSTRG.3655	4	116.42	5.31273	3	0.476125	9.17835	3368	2	38.24	82	0.34967	9.5141	1	0.0833488	-1	29.45	32.3	23.37	14.88	9.33	8.88	6.59	4.66	6.47	10.72	8.82	6.3	8.7	8.02	4.75	1.87	4.96	4.66	3.21	2.05	1
407	MSTRG.379	2	67.7875	12.3336	2	NA	8.30966	856	1	39.02	32	0.42386	10.0244	1	0.0210948	-1	27.34	33.64	19.39	19.63	7.84	8.07	4.56	6.78	5.73	13.22	9.01	5.73	5.03	7.37	2.92	4.09	8.77	5.03	2.92	2.92	1
408	MSTRG.388	2	43.81	68.156	1	NA	4.50704	974	2	57.8	258	0.39418	9.52228	-1	0.305409	-1	24.23	17.97	46.3	11.5	6.06	4.01	10.89	3.29	2.98	4.32	8.22	2.47	11.82	8.02	21.79	4.62	3.39	1.64	5.34	1.13	0
409	MSTRG.402	2	72.86	1.63769	1	NA	NA	1151	0	36.23	61	0.31289	5.04694	1	0.0475822	-1	30.32	33.45	16.16	20.07	9.83	9.48	3.83	7.13	6.7	13.39	7.04	6.35	4.96	5.39	2.87	2.96	8.78	5.22	2.43	3.65	0
410	MSTRG.4043	2	68.26	0.5231	1	NA	NA	880	0	38.52	54	0.35379	6.70245	1	0.0216019	-1	35.68	25.8	19.66	18.86	12.06	8.08	7.74	7.85	6.83	8.08	6.26	4.66	7.96	5.92	2.73	2.96	8.76	3.75	2.96	3.41	0
411	MSTRG.4060	2	74.15	0.143674	1	NA	NA	2466	3	28.26	60	0.25198	6.23053	1	0.0543985	-1	36.29	35.44	13.99	14.27	14.69	12.62	4.95	4.06	10.79	14.85	4.14	5.68	5.4	3.73	2.96	1.87	5.44	4.22	1.95	2.68	0
412	MSTRG.4077	2	101.96	9.813	2	NA	4.07254	1111	0	32.85	40	0.33828	9.22516	1	0.013496	-1	37.08	30.06	17.55	15.3	16.76	9.37	5.86	5.14	7.12	10.36	7.03	5.5	7.66	5.5	2.25	2.16	5.59	4.77	2.43	2.52	0
413	MSTRG.4374	2	70.715	1.85373	1	NA	NA	748	1	34.22	29	0.40336	6.51373	1	0.00759487	-1	40.24	25.53	21.12	13.1	17.8	8.17	8.03	6.16	6.96	7.5	6.29	4.82	9.1	7.23	3.48	1.34	6.43	2.54	3.35	0.8	0
414	MSTRG.4625	3	97.84	60.1011	1	0.5389	5.95289	1545	0	35.02	48	0.34895	10.0519	1	0.0239926	-1	28.87	36.12	20.32	14.69	10.3	9.26	4.73	4.53	8.35	14.7	8.1	4.99	5.83	6.74	4.66	3.11	4.4	5.38	2.85	2.07	0
415	MSTRG.4672	2	63.8	487.74	1	0.3938	5.67455	1364	1	39	67	0.3715	3.41681	1	0.235629	-1	26.03	34.97	19.94	19.06	8.58	8.66	4.33	4.4	6.31	13.65	8.8	6.24	4.92	7.34	3.45	4.26	6.16	5.36	3.37	4.18	1
416	MSTRG.4675	1	94.68	3.56243	1	NA	NA	992	0	37.9	32	0.29987	9.00592	1	0.009497	-1	22.48	39.62	17.64	20.26	7.57	6.76	2.62	5.55	5.05	18.16	9.18	7.16	4.04	8.27	2.12	3.23	5.85	6.36	3.73	4.34	1
417	MSTRG.4683	2	48.455	59.1335	2	NA	NA	757	0	32.5	60	0.40306	4.58429	1	0.111969	-1	36.86	30.65	15.19	17.31	11.9	13.23	4.76	7.01	9.13	8.07	6.08	7.28	6.61	4.89	2.51	1.19	9.13	4.5	1.85	1.85	0
418	MSTRG.4844	2	64.69	2.01153	1	NA	NA	767	0	36.25	61	0.36212	11.2062	1	0.0464237	-1	35.72	28.03	20.08	16.17	15.01	7.7	7.31	5.74	6.66	9.66	6.4	5.22	7.05	6.66	3.92	2.48	6.92	4.05	2.48	2.74	0
419	MSTRG.4873	2	65.815	65.903	6	0.5578	6.38682	1170	0	37.86	80	0.30195	9.07013	1	0.0503214	-1	24.19	37.95	18.12	19.74	7.19	8.73	3.34	4.88	7.53	14.46	8.81	7.19	4.19	7.61	2.74	3.59	5.3	7.1	3.25	4.11	0
420	MSTRG.4994	2	86.64	17.6654	1	NA	6.71498	1435	0	38.05	42	0.35162	8.58856	1	0.0131225	-1	28.43	33.52	18.19	19.86	9.48	8.37	4.25	6.28	6.07	12.34	7.67	7.46	5.02	6.9	3.42	2.86	7.88	5.86	2.86	3.28	0
421	MSTRG.501	8	166	0.986271	1	0.2	NA	2164	0	38.59	134	0.36547	11.7386	1	0.351949	-1	34.7	26.71	18.21	20.38	12.9	8.92	5.32	7.54	6.75	8.18	5.46	6.33	7.17	4.95	3.47	2.64	7.91	4.67	3.98	3.84	0
422	MSTRG.5319	2	126.1	6.83323	3	NA	6.48456	936	0	34.62	38	0.35988	10.1874	1	0.0175914	-1	40.81	24.57	18.91	15.71	16.9	10.37	6.52	7.06	7.27	6.74	5.88	4.6	8.98	4.92	3.53	1.5	7.59	2.57	2.99	2.57	0
423	MSTRG.5375	4	149.42	35.4933	1	0.355117	NA	7422	0	41.05	111	0.33282	5.42963	1	0.408158	-1	30.4	28.55	22.22	18.84	10.79	7.01	5.92	6.67	5.78	9.66	7.56	5.55	6.75	6.87	5.17	3.42	7.06	5.01	3.57	3.19	0
424	MSTRG.5437	2	76.895	20.9423	2	0.8	7.83217	639	1	35.37	58	0.3392	11.2686	1	0.0365218	-1	41.31	23.32	15.65	19.72	18.18	7.84	5.96	9.25	6.43	7.37	4.08	5.49	6.58	3.45	3.45	2.19	10.19	4.55	2.19	2.82	0
425	MSTRG.5554	3	94.2775	0.646937	2	NA	NA	1979	0	41.79	52	0.43692	11.0001	1	0.0780735	-1	28.3	29.91	20.82	20.97	8.44	8.14	4.65	7.03	5.06	9.1	8.09	7.68	7.38	6.42	3.99	3.03	7.43	6.22	4.1	3.24	0
426	MSTRG.5642	2	92.275	7.61015	1	NA	NA	695	0	35.4	61	0.40746	12.0059	1	0.0600139	-1	35.25	29.35	13.24	22.16	14.7	8.07	3.89	8.5	6.77	10.09	4.9	7.64	4.61	5.76	1.73	1.15	9.22	5.48	2.74	4.76	1
427	MSTRG.5734	2	54.24	19.5274	1	0	8.33333	853	0	33.88	31	0.32074	4.00165	1	0.0158325	-1	26.03	40.09	13.01	20.87	7.63	9.04	2.7	6.57	6.57	18.31	6.1	9.15	3.64	6.22	1.76	1.41	8.22	6.57	2.35	3.76	0
428	MSTRG.5744	6	211.255	58.9072	20	0.630567	6.88731	5036	0	37.87	112	0.29297	10.5041	1	0.119171	-1	40.31	21.82	20.15	17.71	16.03	8.68	7.01	8.6	6.53	5.28	5.96	4.03	8.88	4.81	4.27	2.2	8.86	3.06	2.92	2.88	0
429	MSTRG.5765	6	67.64	9.94668	2	0.2	NA	3433	0	39.15	55	0.2895	10.52	1	0.0293968	-1	32.48	28.37	19.49	19.66	11.48	8.45	5.62	6.93	6.93	8.65	6.53	6.26	6.7	6.24	3.7	2.86	7.37	5.01	3.64	3.61	0
430	MSTRG.5876	3	174.415	4.62392	2	NA	6.92004	1271	0	37.45	34	0.32296	8.76862	1	0.00907634	-1	25.33	37.21	17.07	20.38	8.5	8.82	3.31	4.72	6.22	13.54	7.17	10.24	4.72	8.27	2.13	1.97	5.83	6.61	4.49	3.46	0
431	MSTRG.5898	2	58.6575	33.5066	6	NA	NA	454	0	45.81	44	0.39485	8.737	1	0.0201554	-1	32.6	21.59	17.84	27.97	13.91	6.62	4.86	7.06	2.87	4.86	8.17	5.74	3.97	2.65	3.75	7.51	11.92	7.51	1.1	7.51	0
432	MSTRG.5900	2	80.91	5.35208	2	NA	5.67029	573	1	42.06	117	0.41409	8.80267	1	0.579828	1	34.55	23.39	21.47	20.59	15.21	7.69	5.77	5.77	6.64	6.29	5.94	4.55	4.9	5.94	4.37	6.29	7.87	3.5	5.24	4.02	1
433	MSTRG.6042	3	96.7825	113.822	6	0.1279	5.47112	1641	3	35.83	64	0.38216	9.69415	1	0.0567566	-1	27.91	36.26	14.87	20.96	7.8	9.88	4.21	6.04	11.04	13.9	4.39	6.89	3.84	5.06	2.44	3.54	5.18	7.44	3.84	4.51	1
434	MSTRG.6126	2	70.4525	6.23022	2	0.672233	NA	882	1	36.17	33	0.38174	6.48773	1	0.00828341	-1	36.62	27.21	19.84	16.33	12.71	9.53	6.7	7.72	8.06	7.49	7.6	4.09	8.06	7.04	3.18	1.59	7.83	3.18	2.27	2.95	1
435	MSTRG.6139	2	64.715	1.90025	3	NA	5.98288	1031	1	38.7	58	0.33879	8.93427	1	0.0266225	-1	31.91	29.39	20.17	18.53	12.33	8.06	5.44	6.02	6.31	9.71	7.48	5.92	6.12	5.83	4.17	4.08	7.09	5.83	3.11	2.52	0
436	MSTRG.6140	4	111.043	5.54533	2	NA	NA	1713	3	36.43	94	0.37287	8.987	1	0.170849	-1	28.9	34.68	15.12	21.31	9.23	8.7	4.21	6.78	6.37	12.85	6.37	9.11	5.02	6.48	1.69	1.87	8.29	6.6	2.86	3.56	1
437	MSTRG.6175	2	62.66	5.83115	1	NA	NA	1004	0	32.17	76	0.26243	11.2426	1	0.0555501	-1	35.96	31.87	15.24	16.93	16.65	9.47	4.19	5.68	7.38	12.76	5.38	6.28	5.18	5.48	3.29	1.3	6.78	4.09	2.39	3.69	1
438	MSTRG.6181	4	74.925	2.53014	2	NA	NA	980	1	37.14	26	0.36688	7.85858	1	0.00544422	-1	38.57	24.29	25.2	11.94	16.85	8.99	8.89	3.78	7.05	6.44	7.76	3.06	9.5	6.33	5.82	3.58	5.11	2.55	2.76	1.53	0
439	MSTRG.6187	3	81.235	134.483	7	0.1625	6.66667	64207	43	34.18	437	0.25289	9.68597	1	0.993877	1	32.28	33.54	16.95	17.22	11.85	9.87	4.99	5.57	8.2	12.72	6.23	6.4	6.06	5.68	3.1	2.11	6.18	5.27	2.63	3.14	1
440	MSTRG.6212	2	74.715	5.01141	1	NA	NA	1054	0	31.78	29	0.37347	8.99115	1	0.00881456	-1	30.17	38.05	12.62	19.17	11.68	10.26	2.47	5.7	7.88	15.57	5.79	8.83	4.37	5.03	1.61	1.61	6.27	7.12	2.75	3.04	1
441	MSTRG.6219	3	59.86	17.3914	2	NA	7.10024	1908	3	35.27	88	0.30734	9.2547	1	0.0687442	-1	42.24	22.48	18.08	17.19	16.2	8.02	7.13	10.85	6.97	6.71	5.35	3.46	9.12	4.77	2.62	1.57	9.96	2.99	2.99	1.26	1
442	MSTRG.6229	2	82.275	14.4577	4	NA	6.43192	1055	2	32.8	31	0.32964	10.31	1	0.0131432	-1	37.63	29.57	17.91	14.88	14.99	11.67	5.22	5.79	7.69	9.2	7.21	5.41	8.73	4.65	3.42	1.14	6.26	4.08	1.99	2.56	1
443	MSTRG.6241	3	72.12	15.1864	4	NA	4.98392	708	0	33.33	39	0.37072	10.94	1	0.0219814	-1	27.54	39.12	15.82	17.51	9.19	9.76	2.97	5.52	7.78	17.11	7.64	6.65	3.96	6.36	2.4	3.11	6.65	5.8	2.83	2.26	0
444	MSTRG.6251	5	96.34	42.7227	4	0.35085	3.96624	1375	0	35.56	55	0.39955	9.3598	1	0.0422791	-1	34.33	30.11	19.56	16	12.52	9.39	5.6	6.77	7.21	9.46	7.79	5.68	8.01	6.91	3.13	1.53	6.55	4.37	3.06	2.04	1
445	MSTRG.6252	4	153.48	14.8867	5	0.0714	6.42857	5664	4	39.02	151	0.2986	9.93683	1	0.329338	-1	31.78	29.2	22	17.02	10.03	8.99	6.41	6.36	6.48	9.2	7.79	5.72	9.02	6.76	4.24	1.98	6.23	4.26	3.57	2.97	1
446	MSTRG.6273	2	66.145	1.7983	1	NA	NA	523	1	39.58	47	0.4052	6.50751	1	0.0230787	-1	26	34.42	15.3	24.28	6.9	8.05	4.02	6.9	7.28	11.49	5.75	9.96	4.02	6.9	2.49	1.92	7.85	8.05	2.87	5.56	1
447	MSTRG.6276	3	99.445	23.7517	4	0.3333	5.60304	1965	4	32.16	80	0.31286	8.68439	1	0.0522898	-1	33.38	34.45	13.79	18.37	13.59	9.93	3.97	5.86	8.6	13.54	4.84	7.48	4.23	5.45	2.34	1.78	6.92	5.55	2.65	3.26	1
448	MSTRG.6304	2	123.28	2.52469	1	0.425	NA	1385	1	44.98	74	0.34806	9.10016	1	0.0570857	-1	22.53	32.49	22.09	22.89	5.64	6.79	3.68	6.36	4.99	10.26	9.25	8.02	5.78	8.02	4.99	3.32	6.14	7.44	4.19	5.13	1
449	MSTRG.6309	8	182.125	1.91084	3	0.72012	7.69374	2284	1	31.13	90	0.3583	8.80267	1	0.120861	-1	40.02	28.85	11.47	19.66	18	8.89	4.77	8.32	7.01	12.22	3.2	6.44	5.61	3.15	1.53	1.18	9.42	4.56	1.97	3.72	1
450	MSTRG.6317	5	85.61	49.1071	5	0.7692	6.11054	1697	2	39.72	98	0.30685	11.2451	1	0.0882373	-1	23.34	36.95	21.15	18.56	5.72	7.9	4.72	4.95	7.19	13.5	8.61	7.67	6.13	7.55	4.42	3.07	4.3	8.02	3.42	2.83	1
451	MSTRG.6319	6	240.65	12.4549	5	0.92855	8.30886	3058	1	39.99	92	0.40045	6.38373	1	0.271165	-1	24.66	35.35	20.54	19.46	7.62	7.56	4.32	5.17	5.69	12.69	8.7	8.28	5.76	8.41	3.43	2.91	5.56	6.71	4.09	3.11	1
452	MSTRG.6325	4	183.502	50.2398	4	0.39571	8.25352	1874	1	42.64	57	0.31331	9.83698	1	0.0274106	-1	34.53	22.84	24.17	18.46	11.64	5.55	8.65	8.65	5.02	6.25	6.41	5.18	10.73	6.14	5.02	2.3	7.15	4.91	4.06	2.35	1
453	MSTRG.6330	2	85.71	5.09159	1	NA	NA	649	0	34.51	69	0.32544	10.7885	1	0.0476903	-1	35.9	29.58	21.26	13.25	17.28	7.72	6.17	4.63	5.71	11.57	8.02	4.32	8.18	6.64	4.17	2.31	4.78	3.7	2.93	1.85	1
454	MSTRG.6334	3	138.43	20.0165	2	0.6	6.93141	1520	2	44.47	71	0.32068	4.68805	1	0.095852	-1	28.49	27.04	19.67	24.8	8.69	8.29	5.73	5.79	6.98	7.83	5.6	6.58	4.87	5	4.21	5.6	7.97	5.92	4.08	6.85	1
455	MSTRG.6336	3	92.35	2.14563	1	NA	NA	1513	1	37.94	52	0.26009	8.43512	1	0.0221262	-1	25.97	36.09	14.41	23.53	5.75	9.79	3.77	6.68	11.44	13.23	3.7	7.67	2.91	5.62	2.71	3.17	5.89	7.47	4.23	5.95	1
456	MSTRG.6337	2	79.235	3.21976	1	NA	NA	1034	1	37.33	63	0.31487	7.89545	1	0.0259572	-1	36.17	26.5	23.69	13.64	13.07	9.2	8.33	5.52	11.42	6	6.1	3	8.03	7.74	5.13	2.81	3.68	3.48	4.16	2.32	1
457	MSTRG.6349	2	86.655	0.966549	1	NA	NA	2282	2	35.1	74	0.32123	6.54279	1	0.0509717	-1	35.19	29.71	18.62	16.48	14.03	9.86	5.39	5.92	7.85	10	6.66	5.17	7.19	5.87	3.29	2.28	6.14	3.99	3.29	3.07	0
458	MSTRG.6352	2	144.62	1.41625	1	NA	NA	1106	1	39.6	26	0.37798	10.9313	1	0.0136635	-1	31.1	29.29	12.84	26.76	10.32	6.88	4.62	9.32	6.52	10.41	3.26	9.14	3.98	3.62	1.45	3.71	10.23	8.42	3.53	4.62	0
459	MSTRG.6353	2	62.485	3.24392	1	NA	NA	612	0	33.99	47	0.38981	9.69598	-1	0.0948355	-1	29.41	36.6	21.73	12.25	9.17	11.95	5.07	3.11	7.36	13.58	9.66	6.06	8.51	6.22	5.07	1.96	4.26	4.91	1.96	1.15	1
460	MSTRG.6364	2	101.18	2.84164	1	NA	NA	1127	2	42.06	28	0.31365	11.166	1	0.0152512	-1	25.38	32.56	15.62	26.44	6.39	7.46	3.64	7.9	7.46	11.99	5.68	7.37	4.09	4.71	3.02	3.82	7.37	8.44	3.29	7.37	0
461	MSTRG.6365	7	116.15	2.50743	2	NA	NA	12632	11	34.07	126	0.27818	9.08282	1	0.168412	-1	32.94	32.99	18.16	15.91	11.27	10.35	5.45	5.86	8.42	11.55	6.94	6.09	7.13	6.33	3.21	1.5	6.12	4.77	2.56	2.47	1
462	MSTRG.6366	2	104.3	2.6547	1	NA	7.59874	5112	2	48.81	150	0.3263	9.2348	1	0.5	1	22.44	28.76	28.83	19.97	5.65	6.44	5.81	4.54	5.07	9.06	9.06	5.58	6.67	7.53	9.39	5.24	5.05	5.71	4.58	4.62	0
463	MSTRG.6380	2	66.215	2.04256	1	NA	NA	1165	0	45.84	78	0.34284	9.9903	1	0.0698066	-1	29.36	24.81	24.38	21.46	9.19	6.96	6.53	6.7	5.58	6.44	6.62	6.1	6.87	7.9	5.67	3.95	7.65	3.52	5.58	4.73	0
464	MSTRG.6382	1	27.17	5.25338	1	NA	NA	697	0	48.78	71	0.39032	9.84894	1	0.0862118	-1	23.96	27.26	21.09	27.69	5.46	6.75	4.17	7.61	6.9	9.05	5.75	5.6	3.45	5.6	5.75	6.32	8.19	5.89	5.46	8.05	0
465	MSTRG.6389	3	94.27	15.4795	5	0.198433	3.14439	5827	1	43.98	95	0.30958	8.60211	1	0.0880907	-1	29.57	26.45	21.71	22.28	9.51	6.35	4.93	8.77	6.69	7.91	6.92	4.93	6.02	6.99	5.3	3.4	7.35	5.2	4.57	5.17	1
466	MSTRG.6417	2	60.96	2.25066	1	NA	NA	556	1	33.81	49	0.41929	4.07172	1	0.0949435	-1	31.47	34.71	14.75	19.06	11.53	9.91	4.5	5.59	8.47	12.25	6.67	7.21	4.68	5.59	1.44	3.06	6.67	7.03	2.16	3.24	1
467	MSTRG.6420	3	85.89	18.9535	3	0.317425	6.46018	1743	1	35.8	70	0.31074	11.3394	1	0.045536	-1	40.1	24.1	18.19	17.61	16.36	8.61	6.89	8.27	7.41	6.26	4.94	5.45	8.67	5.05	2.47	2.01	7.69	4.13	3.9	1.89	1
468	MSTRG.6427	3	92.595	182.846	8	0.464667	5.51003	13759	2	41.23	96	0.32202	5.00189	1	0.262433	-1	28.9	29.86	21.19	20.05	9.84	7.59	4.66	6.82	5.46	9.55	8.56	6.29	6.68	7.13	4.49	2.89	6.93	5.6	3.47	4.05	1
469	MSTRG.6430	2	68.86	14.1258	1	NA	4.0239	832	1	38.22	19	0.34269	12.0085	1	0.0108047	-1	38.82	22.96	20.91	17.31	16	8.9	6.26	7.7	5.78	6.62	6.26	4.33	7.58	5.29	5.29	2.65	9.51	2.05	3.13	2.65	0
470	MSTRG.6435	6	83.205	7.96002	6	0.25	NA	1607	2	35.22	119	0.31601	6.19171	1	0.361171	-1	28.5	36.28	14.93	20.29	8.28	9.4	3.36	7.41	7.41	14.76	6.91	7.22	5.79	5.67	1.93	1.56	7.04	6.48	2.68	4.11	1
471	MSTRG.6447	2	107.865	8.35056	2	0.4738	NA	1956	1	43.2	64	0.36721	11.1359	1	0.0540221	-1	31.29	25.51	19.22	23.98	10.95	7.11	5.22	7.98	5.12	7.16	6.19	7.06	6.19	5.68	3.99	3.38	9.05	5.58	3.79	5.58	1
472	MSTRG.6448	4	130.545	9.53042	5	NA	NA	1218	1	32.18	56	0.29279	9.42804	-1	0.172374	-1	27.01	40.8	14.04	18.14	8.05	11.01	3.62	4.35	7.31	17.75	7.31	8.38	4.85	5.75	1.23	2.22	6.74	6.33	1.89	3.2	1
473	MSTRG.6452	9	203.46	15.3823	3	0.671689	7.19435	11869	9	39.12	405	0.31985	9.77069	1	0.999833	1	31.51	29.37	19.49	19.63	10.17	9.1	5.33	6.91	6.56	9.31	6.67	6.83	7.68	6.18	3.74	1.89	7.09	4.79	3.74	4.01	1
474	MSTRG.6455	3	171.3	9.82235	3	0.4375	5.98743	1680	2	43.04	103	0.36297	4.59357	1	0.530362	1	25.89	31.07	21.73	21.31	7.27	7.68	3.87	7.03	5.84	10.72	9.23	5.3	4.88	7.15	5.3	4.41	7.92	5.48	3.34	4.59	1
475	MSTRG.6464	5	201	17.4523	6	0.41666	7.70246	3119	2	42.67	190	0.44154	11.951	1	0.974831	1	25.2	32.13	23.02	19.65	7.76	6.51	5.1	5.84	4.94	10.2	9.46	7.54	6.09	8.92	4.91	3.08	6.38	6.51	3.56	3.21	1
476	MSTRG.6471	5	193.998	25.831	4	0.5755	8.4935	3036	1	42.23	128	0.36943	11.6506	1	0.339158	-1	24.87	32.91	22.33	19.89	7.22	6.59	5.21	5.86	5.17	10.64	9.39	7.68	5.83	9.26	4.15	3.1	6.66	6.43	3.56	3.26	1
477	MSTRG.6475	2	135.055	20.6527	3	0.297038	8.04103	4823	1	41.12	129	0.33783	9.89606	1	0.332151	-1	29.55	29.34	21.48	19.64	10.33	7.78	5.02	6.43	5.93	8.94	7.86	6.59	6.7	7.92	4.58	2.28	6.59	4.71	4	4.33	1
478	MSTRG.6487	2	106.8	7.19464	1	NA	4.26326	530	1	39.81	22	0.43493	10.0605	1	0.0146629	-1	27.74	32.45	20.75	19.06	9.83	6.62	4.73	6.62	3.97	13.23	8.51	6.62	5.67	5.86	6.24	3.02	8.32	6.81	1.32	2.65	0
479	MSTRG.6513	3	97.22	27.7302	3	0.5455	6.54775	2816	3	38.85	247	0.43004	5.1225	1	0.999969	1	31.75	29.4	18.22	20.63	10.2	9.88	4.83	6.86	6.61	9.73	5.83	7.25	7.03	4.62	3.66	2.88	7.89	5.19	3.91	3.66	1
480	MSTRG.6518	2	109.93	4.95978	1	0.616667	NA	1754	1	45.55	131	0.37651	8.78986	1	0.576554	1	23.66	30.79	23.89	21.66	4.96	6.56	5.13	6.96	4.68	10.9	8.33	6.9	6.67	8.5	5.42	3.31	7.36	4.85	4.96	4.51	1
481	MSTRG.6519	2	79.5575	98.6043	3	0.3	5.06773	3568	3	37.56	77	0.37441	9.87482	1	0.0924643	-1	31.87	30.58	17.97	19.59	11.69	8.97	5.05	6.17	7.01	11.05	6.78	5.75	5.61	5.83	3.36	3.17	7.54	4.74	2.78	4.51	1
482	MSTRG.6520	7	143.47	1960.76	3	0.437787	4.68208	8772	4	38.17	196	0.31377	9.66681	1	0.772276	1	29.91	31.92	16.75	21.42	8.8	9.03	4.75	7.33	7.87	11.53	5.63	6.9	5.39	5.31	3.47	2.57	7.86	6.05	2.88	4.63	1
483	MSTRG.6526	3	123.192	5.86943	3	0.5	6.97228	1002	2	36.63	43	0.42775	9.05695	1	0.0290875	-1	27.84	35.53	18.06	18.56	8.59	9.69	4.6	4.9	8.99	11.69	7.19	7.69	5	7.19	3	2.9	5.19	6.99	3.3	3.1	1
484	MSTRG.6527	5	140.57	7.31898	3	0.4	NA	1786	3	35.72	44	0.32437	9.62872	1	0.0170513	-1	28.56	35.72	18.03	17.69	9.52	8.96	4.65	5.43	7.28	13.28	7.56	7.56	5.6	7.45	3.14	1.85	6.11	6.05	2.69	2.86	1
485	MSTRG.6530	2	61.31	1.48505	1	NA	NA	819	1	36.75	54	0.38537	9.72968	1	0.0377345	-1	34.92	28.33	20.39	16.36	12.35	8.68	6.72	7.09	7.7	8.56	7.95	4.16	7.33	7.95	3.42	1.71	7.46	3.18	2.32	3.42	0
486	MSTRG.6537	3	169.365	16.7514	4	NA	6.73931	1369	1	41.2	79	0.46798	8.63751	1	0.274151	-1	29.73	29.07	17.46	23.74	9.8	7.53	4.31	8.11	4.82	9.14	5.85	9.21	6.87	6.51	2.92	1.17	8.26	5.85	4.39	5.26	1
487	MSTRG.6547	4	90.545	4.57098	1	NA	NA	1791	2	33.61	41	0.29707	10.5433	1	0.0201269	-1	42.88	23.51	16.92	16.69	18.88	8.49	6.59	8.88	8.1	6.42	4.86	4.13	7.49	4.97	2.85	1.62	8.44	3.63	2.57	2.07	1
488	MSTRG.6550	2	109.77	6.69975	3	NA	NA	1117	1	44.05	43	0.40387	10.0701	1	0.0292909	-1	29.9	26.05	21.22	22.83	9.77	8.6	4.57	6.9	5.38	7.08	7.44	6.18	5.65	5.82	4.84	4.93	9.14	4.57	4.3	4.84	1
489	MSTRG.6558	4	75.57	132.243	4	0.271567	5.8101	2162	1	49.21	133	0.30509	10.7571	1	0.210551	-1	26.69	24.1	28.68	20.54	8.1	5.92	6.25	6.43	3.56	6.43	8.84	5.23	7.91	7.82	7.96	5	7.13	3.93	5.6	3.89	1
490	MSTRG.6563	2	127.05	18.3729	2	0.459167	4.26679	3525	1	41.48	276	0.42208	4.87262	1	0.999996	1	33.67	24.85	20.82	20.65	11.55	6.7	6.33	9.08	4.51	7.49	6.44	6.41	8.6	6.81	4.51	0.91	9.02	3.83	3.55	4.26	1
491	MSTRG.6574	2	85.5975	12.1032	2	0.3333	7.76469	1118	2	33.36	51	0.3173	9.41718	1	0.0205103	-1	39.09	27.55	20.21	13.15	17.37	9.04	7.7	4.92	7.43	9.04	7.16	3.94	8.42	5.73	3.49	2.6	5.91	3.67	1.88	1.7	1
492	MSTRG.6583	6	202.23	27.5667	7	0.4444	7.69187	2828	1	41.41	95	0.38281	9.78265	1	0.206215	-1	34.76	23.83	22.28	19.13	13.02	6.65	7.92	7.18	5.02	7.61	5.94	5.27	8.91	6.01	4.67	2.69	7.78	3.57	3.75	4	1
493	MSTRG.6588	4	112.362	38.6412	6	0.630125	7.12095	5222	2	49.56	166	0.3364	6.95233	1	0.854126	1	23.8	26.64	23.36	26.2	5.98	5.44	4.67	7.72	3.98	8.43	7.64	6.57	5.52	7.28	5.34	5.23	8.33	5.5	5.69	6.68	1
494	MSTRG.6600	5	156.355	3.93765	3	0.270083	7.18843	2805	1	43.03	92	0.32314	11.1672	1	0.0877763	-1	27.63	29.34	20.14	22.89	8.52	7.38	3.64	8.06	5.06	10.73	6.74	6.81	6.56	6.17	4.96	2.46	7.49	5.06	4.81	5.53	1
495	MSTRG.6601	7	219.83	12.0968	7	0.45	8.61945	3069	1	42.07	130	0.35654	10.6951	1	0.386457	-1	34.25	23.69	20.56	21.51	11.96	6.23	6.68	9.39	4.89	7.14	6.1	5.57	7.99	6.32	3.32	2.9	9.39	4.01	4.47	3.65	1
496	MSTRG.6605	2	76.7275	37.0785	1	0.5556	6.92913	6167	6	34.98	123	0.27133	11.7315	1	0.103443	-1	35.17	29.85	16.49	18.49	14.27	9.44	4.93	6.52	8.21	11.73	5.01	4.91	5.53	4.44	3.29	3.23	7.17	4.23	3.26	3.83	1
497	MSTRG.6631	2	60.4	6.24027	1	NA	NA	930	3	36.02	35	0.3904	5.42584	1	0.0134078	-1	26.45	37.53	18.17	17.85	8.83	9.9	3.98	3.66	5.06	15.39	8.4	8.72	5.92	6.14	3.55	2.58	6.67	6.14	2.15	2.91	1
498	MSTRG.6640	2	121.835	7.70802	1	NA	6.03499	767	1	37.94	33	0.31866	11.0003	1	0.0167315	-1	32.86	29.2	22.69	15.25	11.1	7.83	8.49	5.48	5.22	11.88	7.7	4.44	10.18	6.27	3.52	2.74	6.4	3.13	3	2.61	0
499	MSTRG.6650	3	67.625	7.92633	2	NA	NA	875	2	34.51	30	0.40019	7.93378	1	0.00830326	-1	37.94	27.54	14.4	20.11	15.9	9.61	4.58	7.89	7.32	10.3	4.23	5.61	5.03	3.09	3.43	2.86	9.73	4.58	2.17	3.66	1
500	MSTRG.6671	4	122.028	66.6724	4	0.39535	7.53161	1428	1	37.89	75	0.39571	6.37653	1	0.109653	-1	27.45	34.66	17.86	20.03	8.34	8.83	4.98	5.33	7.5	12.89	6.66	7.57	6.31	5.54	3.08	2.94	5.33	7.36	3.15	4.2	1
501	MSTRG.6676	1	NA	NA	1	NA	NA	930	0	47.85	49	0.36248	4.63385	1	0.0362081	-1	24.73	27.42	25.48	22.37	7.97	5.49	5.06	6.24	3.66	8.29	10.55	4.95	6.35	8.61	5.6	4.84	6.67	5.06	4.31	6.35	0
502	MSTRG.6680	2	78.35	233.685	2	NA	6.50943	951	1	39.43	22	0.32639	8.49677	1	0.00506916	-1	35.75	24.82	20.4	19.03	13.79	9.05	6.74	6.11	5.47	7.89	6.74	4.74	6.84	5.05	4.42	4.11	9.68	2.84	2.53	4	1
503	MSTRG.6685	2	53.5	4.90287	2	NA	1.49837	798	0	30.45	44	0.34282	9.7309	1	0.0184956	-1	32.21	37.34	15.16	15.29	11.79	9.66	5.4	5.27	8.78	17.57	5.52	5.52	6.15	5.52	2.63	0.88	5.52	4.52	1.63	3.64	0
504	MSTRG.6691	4	79.6	1.24484	1	NA	NA	943	1	37.86	26	0.28385	7.85858	1	0.00662588	-1	38.39	23.75	25.66	12.2	16.77	7.75	9.87	3.93	6.05	6.26	8.07	3.4	10.08	6.69	5.52	3.4	5.52	2.97	2.23	1.49	1
505	MSTRG.6696	2	115.968	82.0919	3	0.3333	8.44125	1552	1	35.89	75	0.30942	8.95587	1	0.043569	-1	26.48	37.63	14.24	21.65	7.54	9.67	4.26	4.96	7.48	15.41	5.8	8.96	3.93	5.09	1.74	3.48	7.54	7.48	2.45	4.19	1
506	MSTRG.6711	2	62.52	0.180971	1	NA	NA	716	1	36.31	37	0.36894	10.0523	1	0.0170487	-1	26.68	37.01	19.41	16.9	8.81	8.25	3.78	5.73	5.73	16.5	8.95	5.87	5.17	7.83	3.5	2.94	6.99	4.48	3.08	2.38	0
507	MSTRG.6712	3	121.93	40.4592	4	NA	NA	24730	21	34.79	377	0.27818	9.20282	1	0.997157	1	32.93	32.28	18.01	16.78	12.3	9.62	5.47	5.54	8.08	11.69	6.34	6.16	6.7	6.02	3.28	2.02	5.85	4.96	2.92	3.05	1
508	MSTRG.6724	5	98.5	38.214	4	0.6429	6.05067	6400	6	29	124	0.22328	9.73358	1	0.155908	-1	35.02	35.98	14.25	14.75	13.69	12.21	4.49	4.64	11.02	14.25	4.95	5.77	5.77	4.31	2.58	1.58	4.55	5.2	2.23	2.77	0
509	MSTRG.6732	3	91.97	10.2187	2	NA	8.05556	2192	2	34.99	79	0.35341	9.40631	1	0.0762606	-1	36.77	28.24	18.89	16.1	14.47	9.04	6.66	6.57	6.39	9.63	6.44	5.8	8.72	5.57	2.78	1.83	7.17	4.02	3.01	1.92	1
510	MSTRG.6744	2	70.96	11.7884	1	0.4286	5.68951	1254	2	42.82	75	0.35452	11.3627	1	0.0680047	-1	40.91	16.27	23.92	18.9	18.12	5.59	8.62	8.54	4.15	3.83	5.27	3.03	9.5	5.19	5.91	3.35	9.18	1.68	4.15	3.91	0
511	MSTRG.6752	2	111.85	0.25002	1	NA	NA	2386	3	28.54	42	0.23537	9.39777	1	0.0307513	-1	33.82	37.64	15.13	13.41	12.87	11.99	4.57	4.36	11.03	14.09	6.92	5.62	5.41	6.37	2.05	1.3	4.53	5.16	1.59	2.14	0
512	MSTRG.6773	9	71.5675	701.799	8	0.1782	5.03173	8230	4	38.93	232	0.35733	3.85358	1	0.999846	1	34	27.07	19.6	19.33	12.24	8.29	6.04	7.42	7.08	8.49	5.61	5.88	7.52	5.5	4.41	2.16	7.16	4.79	3.54	3.85	1
513	MSTRG.6774	2	49.15	0.944222	1	NA	NA	855	1	31.11	65	0.30585	10.1824	1	0.0366493	-1	31.11	37.78	14.27	16.84	11.83	9.72	3.75	5.74	9.6	17.1	6.21	4.92	5.15	4.92	1.76	2.46	4.57	5.97	2.58	3.75	0
514	MSTRG.6775	4	140.76	48.7144	2	NA	NA	3735	3	40.94	126	0.39847	9.6745	1	0.605591	1	33.79	25.27	19.06	21.87	11.81	8.3	5.89	7.77	7.23	6.7	4.53	6.83	7.23	5.41	4.15	2.28	7.5	4.87	4.5	5.01	1
515	MSTRG.6792	2	81.84	8.58661	2	0.201375	6.28766	4671	1	40.33	1455	0.4685	9.09808	1	1	1	27.27	32.39	18.95	21.39	7.54	7.99	4.95	6.79	5.91	10.41	7.77	8.31	6.77	7.77	2.57	1.84	7.07	6.21	3.66	4.45	1
516	MSTRG.6801	3	95.345	50.0284	2	0.875	6.2141	2920	2	36.54	312	0.40192	8.60773	1	0.999975	1	28.56	34.9	17.19	19.35	9.76	8.56	4.32	5.89	5.72	13.43	7.16	8.6	6.61	6.58	2.54	1.47	6.44	6.34	3.19	3.39	1
517	MSTRG.6806	4	69.865	27.6974	5	0.1667	5.03906	1696	0	38.38	71	0.33005	10.253	1	0.0504663	-1	35.97	25.65	20.17	18.22	13.33	8.2	7.08	7.32	7.14	7.26	6.14	5.13	7.96	6.08	3.6	2.54	7.55	4.07	3.36	3.24	1
518	MSTRG.6905	2	72.985	2.91001	2	0	NA	1054	0	32.73	49	0.31604	11.0479	1	0.0264718	-1	30.08	37.19	17.93	14.8	11.68	11.3	2.94	4.18	7.79	14.53	8.55	6.27	5.32	7.31	4.08	1.23	5.32	3.99	2.37	3.13	0
519	MSTRG.6975	3	165.945	158.785	4	NA	5.38462	1456	0	36.68	63	0.31074	7.76984	1	0.0256387	-1	37.91	25.41	18.75	17.93	14.3	10.31	6.32	7.01	7.35	7.9	5.7	4.47	7.9	4.47	3.23	3.16	8.32	2.75	3.51	3.3	0
520	MSTRG.7025	6	144.905	1.04141	3	NA	NA	2705	0	37.26	50	0.30419	9.51617	1	0.0199806	-1	30.2	32.53	17.63	19.63	9.91	8.1	5.07	7.1	7.47	11.35	6.14	7.58	6.1	6.95	2.7	1.89	6.69	6.14	3.74	3.07	0
521	MSTRG.7161	4	83.715	71.8431	1	0.639125	NA	4506	0	38.02	87	0.31947	11.1652	1	0.0747045	-1	33.49	28.5	20.2	17.82	12.96	8.12	5.55	6.84	6.33	9.61	6.79	5.77	7.44	6.3	4.51	1.95	6.77	4.44	3.35	3.26	0
522	MSTRG.7206	2	69.08	96.1524	1	0.3333	4.66063	4962	2	33.33	72	0.30296	9.51398	1	0.0407684	-1	34.2	32.47	17.35	15.98	12.4	10.5	5.87	5.42	9.49	12.38	5.93	4.68	6.13	5.04	3.1	3.08	6.19	4.54	2.46	2.8	0
523	MSTRG.7321	3	67.6	41.4778	1	0.375	7.41441	2523	2	34.72	177	0.30576	9.35309	1	0.615627	1	30.64	34.64	15.06	19.66	11.86	8.76	3.97	6.03	6.98	14.04	5.31	8.33	5.31	5.67	2.26	1.82	6.5	6.15	3.53	3.49	1
524	MSTRG.7331	2	113.255	0.270753	1	NA	NA	786	1	43.13	24	0.36382	6.69159	1	0.00439483	-1	33.33	23.54	19.59	23.54	11.72	5.99	6.24	9.43	4.71	7.52	4.97	6.37	8.15	4.84	3.69	2.93	8.79	5.22	4.71	4.71	0
525	MSTRG.7394	6	126.845	1.29501	2	NA	NA	2534	1	40.84	272	0.3919	8.84222	1	0.99963	1	30.47	28.69	15.75	25.1	9.12	9.04	4.82	7.46	7.7	8.84	4.22	7.94	4.93	4.03	3.47	3.32	8.69	6.79	3.24	6.4	1
526	MSTRG.7403	5	98.925	30.743	1	NA	NA	3298	1	32.38	131	0.2671	9.38666	1	0.168391	-1	29.96	37.66	15.77	16.62	10.95	9.25	4.7	5.03	9.04	16.32	6.1	6.22	5.37	5.76	2.49	2.15	4.58	6.34	2.49	3.22	0
527	MSTRG.7439	19	116.985	2.12591	1	NA	NA	6797	0	39.31	82	0.26358	9.80804	1	0.0538517	-1	33.12	27.57	21.01	18.3	12.1	7.8	5.93	7.3	5.99	8.51	7.27	5.81	8.06	6.87	4.12	1.94	6.97	4.38	3.69	3.25	0
528	MSTRG.7442	2	67.27	1.5538	1	NA	NA	2489	1	34.87	61	0.27435	5.40179	1	0.0569923	-1	34.31	30.82	17.24	17.64	13.42	9.69	5.14	6.07	8.24	10.61	5.87	6.07	6.31	5.67	3.74	1.53	6.35	4.86	2.49	3.94	0
529	MSTRG.7446	2	93.36	3.21191	1	NA	4.54447	894	0	28.97	66	0.35245	6.22479	1	0.0450633	-1	33.78	37.25	13.42	15.55	13.55	11.76	3.58	4.82	9.18	15.9	5.94	6.27	5.82	4.03	1.9	1.68	5.26	5.49	2.02	2.8	0
530	MSTRG.7461	5	102.31	5.20153	1	NA	NA	5393	2	35.06	71	0.29575	5.07709	1	0.0832721	-1	31.93	33.01	17.89	17.17	10.44	10.59	5.16	5.73	8.05	12.05	6.6	6.31	7.01	5.17	3.8	1.91	6.44	5.19	2.34	3.21	1
531	MSTRG.7492	6	110.11	5.5558	5	0.49365	NA	10564	8	34.67	626	0.3323	9.48724	-1	0.344548	-1	32.82	32.51	17.24	17.44	12.3	9.8	4.98	5.74	8.22	12.37	6.07	5.85	6.13	5.72	3.29	2.1	6.17	4.62	2.91	3.74	0
532	MSTRG.7537	12	66.55	39.0855	1	0.9091	2.66773	3627	0	36.2	75	0.31294	10.2203	1	0.0511969	-1	34.74	29.06	19.38	16.82	12.44	9.38	6.23	6.7	8.33	9.29	5.9	5.52	7.2	6.07	3.97	2.15	6.78	4.3	3.28	2.45	0
533	MSTRG.7634	2	138.145	0.950244	2	NA	NA	1077	0	36.77	39	0.35999	9.69611	1	0.0161061	-1	31.75	31.48	15.04	21.73	11.34	8.55	4.28	7.53	7.62	10.22	4.83	8.83	5.2	6.23	1.86	1.77	7.62	6.41	4.09	3.62	0
534	MSTRG.7644	3	89.35	18.1729	3	0.54128	NA	4321	1	38.93	510	0.42592	9.25079	1	1	1	29.83	31.24	18.07	20.85	10.42	7.8	4.93	6.69	6.18	11.62	6.5	6.94	5.56	6.32	3.01	3.17	7.69	5.51	3.61	4.05	0
535	MSTRG.7706	2	98.91	7.88993	1	NA	5.98693	1035	0	36.04	68	0.28766	10.8442	1	0.0420415	-1	27.63	36.33	19.23	16.81	9.28	8.51	4.93	4.93	7.74	14.99	6.58	7.06	6.87	5.51	4.35	2.42	3.77	7.35	3.29	2.42	0
536	MSTRG.7715	2	50.8775	9.08514	2	NA	4.31169	956	0	33.89	55	0.2778	10.2663	1	0.0291062	-1	35.67	30.44	17.57	16.32	13.19	10.47	6.7	5.34	9.01	10.16	5.65	5.55	6.7	6.28	2.41	2.2	6.7	3.56	2.83	3.25	0
537	MSTRG.7999	5	63.57	275.41	1	0.369633	NA	6352	2	37.69	413	0.36604	8.94464	1	0.999998	1	27.63	34.68	17.22	20.47	9.35	7.84	4.61	5.83	6.27	13.24	6.8	8.38	5.4	6.93	2.72	2.16	6.6	6.68	3.09	4.11	0
538	MSTRG.8056	2	66.265	45.9806	1	NA	3.16294	712	0	37.78	41	0.38375	9.30035	1	0.0183135	-1	22.19	40.03	17.7	20.08	6.33	8.02	3.38	4.5	5.34	17.58	8.86	8.16	4.5	7.88	2.25	3.09	6.05	6.61	3.09	4.36	0
539	MSTRG.8155	2	82.7175	9.17386	2	0.7375	4.88636	1649	0	35.96	52	0.37999	8.18927	1	0.024113	-1	28.62	35.42	16.13	19.83	9.16	9.41	4.07	6.01	6.86	13.77	6.74	8.07	4.73	6.61	2.37	2.37	7.89	5.64	2.97	3.34	0
540	MSTRG.8687	9	159.05	5.28317	4	0.247233	NA	2411	0	38.45	61	0.29637	8.49286	1	0.0242459	-1	34.67	26.88	19.74	18.71	13.44	8.42	6.14	6.68	6.27	8.38	6.22	6.02	7.93	5.39	3.69	2.7	7.01	4.69	3.69	3.32	0
541	MSTRG.8748	1	110.63	6.94327	1	NA	3.66135	1127	0	34.07	103	0.40101	9.48956	1	0.341641	-1	35.67	30.26	19.34	14.73	12.43	10.39	7.46	5.33	9.15	9.33	6.57	5.24	7.82	6.39	3.02	2.13	6.22	4.17	2.31	2.04	0
542	MSTRG.8856	2	123.92	1.82025	1	NA	NA	464	0	39.01	35	0.46368	7.93536	1	0.0192027	-1	32.54	28.45	19.83	19.18	13.61	7.99	4.97	6.05	4.54	9.94	8.86	4.97	7.99	6.26	3.67	1.94	6.48	4.32	2.38	6.05	0
543	MSTRG.9241	3	99.1425	3.22056	2	0.2353	7.99622	1677	2	34.23	48	0.30953	8.67645	1	0.0153921	-1	27.67	38.1	15.62	18.6	10.14	8.05	4.24	5.19	6.68	15.81	6.98	8.65	5.07	6.56	1.79	2.21	5.73	7.7	2.63	2.57	0
544	MSTRG.9245	4	88.79	4.71723	1	0.16665	8.74834	1629	0	36.34	45	0.2655	10.0104	1	0.0236931	-1	36.03	27.62	20.93	15.41	14.31	7.56	7.19	6.94	6.39	9.83	6.94	4.48	8.97	5.96	3.62	2.4	6.39	4.24	3.19	1.6	0
545	MSTRG.9264	2	51.89	15.2788	1	0.8462	NA	7182	0	38.6	140	0.31381	5.88824	1	0.657907	1	31.09	30.31	20.44	18.16	11.1	7.9	5.39	6.71	5.92	10.81	7.39	6.18	7.19	7.02	4.14	2.1	6.88	4.6	3.52	3.16	0
546	MSTRG.9833	6	126.33	0.683057	3	NA	NA	2157	0	35.42	81	0.29279	8.42072	1	0.0489624	-1	27.31	37.27	16.46	18.96	8.95	8.72	4.41	5.24	7	15.31	7.1	7.88	5.52	6.63	2.13	2.13	5.84	6.63	2.78	3.71	0
547	MSTRG.9852	2	88.12	650.123	2	0.380695	7.26891	1833	0	39.83	70	0.3044	11.8787	1	0.0417557	-1	28.86	31.31	21.17	18.66	8.84	8.79	6.5	4.75	7.97	11.08	5.73	6.5	6.66	5.57	4.59	4.37	5.35	5.9	4.37	3.06	0
548	MSTRG.991	7	89.68	3.94133	2	1	NA	1809	1	42.51	123	0.32071	9.50653	1	0.234986	-1	33.44	24.05	15.31	27.2	12.22	6.69	4.2	10.34	3.87	7.02	5.92	7.19	5.75	4.37	2.27	2.93	11.62	5.92	2.93	6.75	0
549	MSTRG.9981	2	59.125	94.1384	3	0.38115	8.54795	1772	1	31.38	47	0.29613	7.95966	1	0.0136461	-1	30.08	38.54	16.82	14.56	10.78	10.78	4.69	3.78	8.7	16.43	7	6.44	5.59	5.93	3.16	2.15	5.03	5.36	1.98	2.2	0
