# Supplementary figures and images for: Nanopore Direct RNA-Seq Reveals Widespread and Predictable Non-Coding Transcriptional Variations in DNA Methylation-deficient Arabidopsis
Source: Research Square preprint supplement (doi:10.21203/rs.3.rs-6399991/v1), 2025-05-07

Primary alignment to genome      Primary alignment to transcriptome

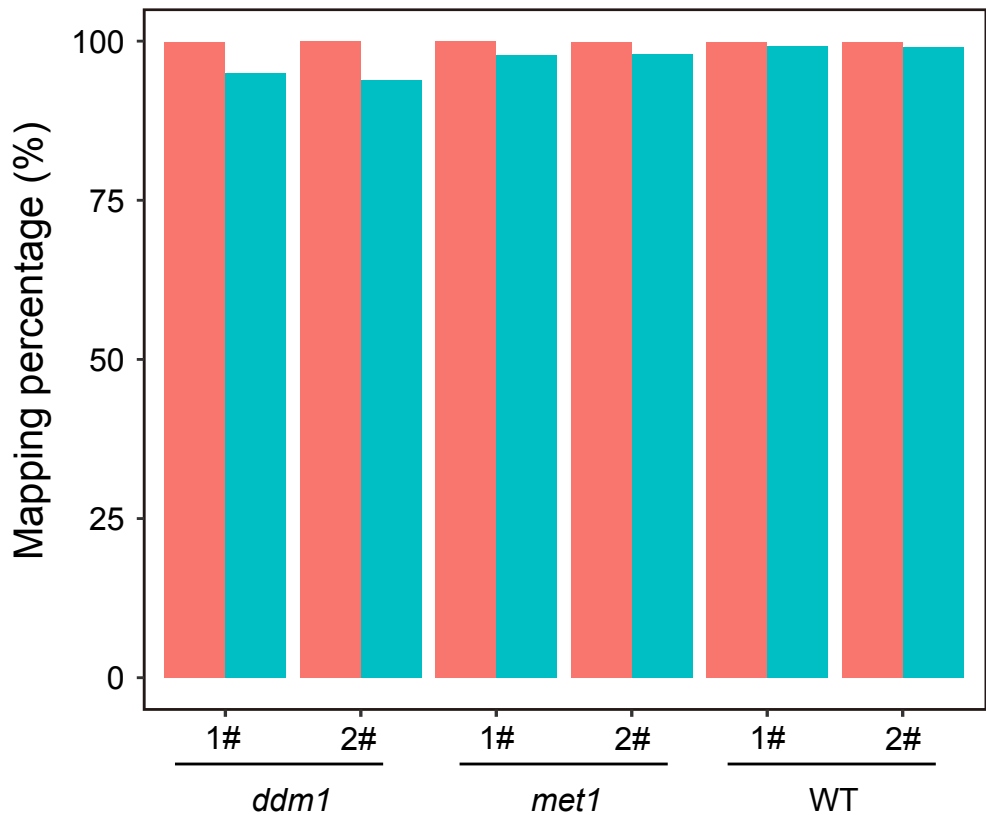

Supplement: Supplementary file 2 [file e6307313d257803dbcc375d5.pdf]
